# Supplementary material for: Solvent-dependent regio- and stereo-selective reactions of 3-formylchromones with 2-aminobenzothiazoles and transacetalization efficiency of the product 3-((benzo[d]thiazol-2-ylimino)butyl)-4H-chromen-4-one
Source: Royal Society of Chemistry journal article supplement (doi:10.1039/c9ra02763g), 2019-01-01

## Solvent dependent *regio*- and *stereo*- selective reactions of 3-formylchromones with 2-aminobenzothiazoles, transacetalization efficiency of the product 3-((benzo[d]thiazol-2-ylimino)butyl)-4H-chromen-4-one.

Owais Ahmed,<sup>a,b</sup> Vandana Cherkadu,<sup>c</sup> Praveen Kumar Kalavagunta,<sup>\*b</sup> and Jing Shang<sup>\*b</sup>

<sup>a</sup> School of Life Sciences and Technology, China Pharmaceutical University, Nanjing 211198. China.

<sup>b</sup> State Key Laboratory of Natural Medicines, Jiangsu Key Laboratory of TCM Evaluation and Translational Research, School of Chinese Pharmacy, China Pharmaceutical University, Nanjing 211198. China.

<sup>c</sup> R&D Centre, CJEX BioChem, 7&8 2nd Cross, Muniswamappa layout, Hosur Road, Bommanahalli, Bangalore 560068, India.

Address for Correspondence:

Jing Shang: [shangjing21cn@163.com](mailto:shangjing21cn@163.com)

Praveen Kumar Kalavagunta: [kgpk81@gmail.com](mailto:kgpk81@gmail.com); [pk.kalavagunta@outlook.com](mailto:pk.kalavagunta@outlook.com).

| Entry | Compounds                                                                                                                                        | Page    |
|-------|--------------------------------------------------------------------------------------------------------------------------------------------------|---------|
| 1     | Spectral data for the Quinoline-, Quinolone- and Indole-3-carbaldehyde derivatives <b>Q1, Q2, Q4, Q5, Q7-Q11</b>                                 | S2-S4   |
| 2     | Spectral data for the compounds <b>3aa-3bk</b>                                                                                                   | S5-S15  |
| 3     | Spectral data for the compounds <b>4a-4g</b>                                                                                                     | S16-S17 |
| 4     | Spectral data for the compounds <b>5a, 5b</b>                                                                                                    | S18     |
| 5     | <sup>1</sup> H & <sup>13</sup> C NMR spectrum for the Quinoline-, Quinolone- and Indole-3-carbaldehyde derivatives <b>Q1, Q2, Q4, Q5, Q7-Q11</b> | S19-S27 |
| 6     | <sup>1</sup> H & <sup>13</sup> C NMR spectrum for the compounds <b>3aa-3bk</b>                                                                   | S18-S65 |
| 7     | <sup>1</sup> H & <sup>13</sup> C NMR spectrum for the compounds <b>4a-4g</b>                                                                     | S66-S72 |
| 8     | <sup>1</sup> H & <sup>13</sup> C NMR spectrum for the compounds <b>5a, 5b</b>                                                                    | S73-S74 |

Spectral data for the Quinoline-, Quinolone- and Indole-3-carbaldehyde derivatives **Q1**, **Q2**, **Q4**, **Q5** and **Q7-Q11**.

4-chloroquinoline-3-carbaldehyde (**Q1**). Color & State: Wheat brown solid. M.P.: 274-276

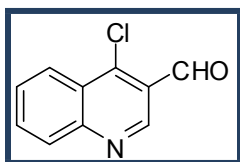

<sup>0</sup>C. <sup>1</sup>H NMR (CDCl<sub>3</sub>, 500 MHz): δ 10.73 (s, 1H), 9.28 (s, 1H), 8.42 (dd, 1H, J<sub>1</sub> = 8.4 Hz, J<sub>2</sub> = 1.5 Hz), 8.19 (d, 1H, J = 8.4 Hz), 7.96-7.91 (m, 1H), 7.78-7.75 (m, 1H); <sup>13</sup>C NMR (CDCl<sub>3</sub>, 75 MHz): δ 189.0, 150.7, 148.5, 148.1, 133.2, 130.1, 128.6, 125.6, 125.0, 124.3; IR: ν<sub>max</sub>, 2917, 1683, 1585, 1491, 1403, 1340, 754 cm<sup>-1</sup>. EI-MS: M<sup>1+</sup>, 191. EI-HRMS: calcd for. C<sub>10</sub> H<sub>7</sub> O N Cl = 192.0211. found: 192.0205.

1,4-dihydro-4-oxoquinoline-3-carbaldehyde (**Q2**). Color & State: Wheat brown solid. M.P.:

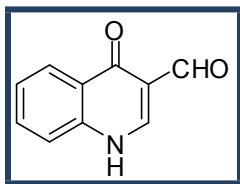

**290-292** <sup>0</sup>C. <sup>1</sup>H NMR (DMSO-d<sub>6</sub>, 300 MHz): δ 10.19 (s, 1H), 8.48 (d, 1H, J = 6.8 Hz), 8.21 (d, 1H, J = 7.7 Hz), 7.80-7.72 (m, 1H), 7.66 (d, 1H, J = 7.9 Hz), 7.47 (t, 1H, J = 7.9 Hz); <sup>13</sup>C NMR (DMSO-d<sub>6</sub>, 75 MHz): δ 188.6, 176.2, 143.1, 139.3, 133.0, 127.7, 125.3, 125.2, 119.3, 116.2; IR: ν<sub>max</sub>, 3438, 3128, 2735, 1665, 1619, 1559, 1466, 1387, 1337, 1280, 1193, 1102, 974, 853, 767 cm<sup>-1</sup>. LC-MS: M-1, 172. EI-HRMS: calcd. for. C<sub>10</sub> H<sub>8</sub> O<sub>2</sub> N = 174.0550. found: 174.0543.

ethyl 3-formyl-4-oxoquinoline-1(4H)-carboxylate (**Q4**): Color & State: Pale yellow solid.

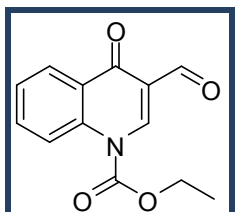

M.P.: **197-199** <sup>0</sup>C. <sup>1</sup>H NMR (DMSO-d<sub>6</sub>, 500 MHz): δ 10.44 (s, 1H), 9.01 (s, 1H), 8.60 (d, 1H, J = 8.7 Hz), 8.47 (dd, 1H, J<sub>1</sub> = 7.9 Hz, J<sub>2</sub> = 1.7 Hz), 7.76-7.71 (m, 1H), 7.52 (t, 1H, J = 8.1 Hz); <sup>13</sup>C NMR (DMSO-d<sub>6</sub>, 75 MHz): δ 188.9, 177.2, 150.7, 142.3, 137.8, 133.6, 127.8, 126.6, 126.5, 120.1, 117.9, 66.2, 14.0; IR: ν<sub>max</sub>, 3401, 3105, 2981, 2937, 2855, 1755, 1691, 1648, 1603, 1560, 1464, 1371, 1345, 1279, 1218, 1093, 1031, 952, 938, 772 cm<sup>-1</sup>. EI-MS: M-COOEt, 172. EI-HRMS: calcd for. C<sub>10</sub> H<sub>8</sub> O<sub>2</sub> N = 174.0550. found: 174.0544.

1,4-dihydro-4-oxo-1-tosylquinoline-3-carbaldehyde (**Q5**). Color & State: Off-white solid.

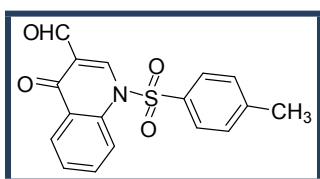

M.P.: **165-167** <sup>0</sup>C. <sup>1</sup>H NMR (DMSO-d<sub>6</sub>, 300 MHz): δ 10.16 (s, 1H), 8.45 (s, 1H), 8.20 (d, 1H, J = 7.9 Hz), 7.76 (t, 1H, J = 8.3 Hz), 7.65 (d, 1H, J = 8.1 Hz), 7.52-7.44 (m, 3H), 7.13 (d, 1H, J = 7.9 Hz), 2.28 (s, 3H); <sup>13</sup>C NMR (DMSO-d<sub>6</sub>, 75 MHz): δ 188.9, 176.5, 145.0, 143.4, 139.4, 138.3, 133.3, 128.3, 127.7, 125.6, 125.4, 119.5, 116.4, 20.9;

IR:  $\nu_{\max}$ , 3089, 3052, 2982, 1688, 1662, 1606, 1464, 1379, 1178, 899, 760  $\text{cm}^{-1}$ . EI-MS: M-Tosyl, 172. EI-HRMS: calcd for.  $\text{C}_{10} \text{H}_8 \text{O}_2 \text{N} = 174.0550$ . found: 174.0543.

tert-butyl 3-formyl-1H-indole-1-carboxylate (**Q7**): Color & State: White solid. M.P.: 130-132

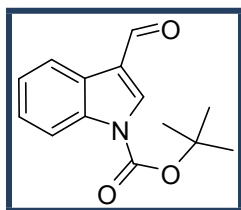

$^{\circ}\text{C}$ .  $^1\text{H}$  NMR ( $\text{CDCl}_3$ , 400 MHz):  $\delta$  10.10 (s, 1H), 8.29 (dd, 1H,  $J_1 = 6.8$  Hz,  $J_2 = 1.6$  Hz), 8.23 (s, 1H), 8.15 (d, 1H,  $J = 7.9$  Hz), 7.44-7.34 (m, 2H), 1.71 (s, 9H);  $^{13}\text{C}$  NMR ( $\text{CDCl}_3$ , 100 MHz):  $\delta$  185.7, 148.8, 136.5, 135.9, 126.1, 126.0, 124.6, 122.1, 121.6, 115.1, 85.6, 28.1; IR:  $\nu_{\max}$ , 2925, 1743, 1679, 1452, 1400, 1372, 1360, 1243, 1158, 761  $\text{cm}^{-1}$ ; ESI-MS: M+1, 246. ESI-HRMS: calcd. for  $\text{C}_{14} \text{H}_{16} \text{O}_3 \text{N} = 246.1125$ . found: 246.1120.

3-(dimethoxymethyl)quinolin-4(1H)-one (**Q8**): Color & State: Yellow solid. M.P.: 217-219

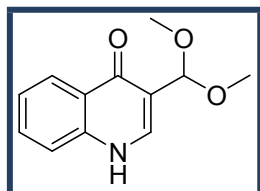

$^{\circ}\text{C}$ .  $^1\text{H}$  NMR ( $\text{DMSO-d}_6$ , 300MHz):  $\delta$  8.11 (d, 1H,  $J = 7.9$  Hz), 7.91 (s, 1H), 7.65 (t, 1H,  $J = 7.7$  Hz), 7.56 (d, 1H,  $J = 8.1$  Hz), 7.33 (t, 1H,  $J = 7.2$  Hz), 5.54 (s, 1H), 3.27 (s, 6H);  $^{13}\text{C}$  NMR ( $\text{DMSO-d}_6$ , MHz):  $\delta$  174.9, 139.5, 137.3, 131.8, 125.4, 125.0, 123.4, 118.4, 116.8, 98.6, 53.2; IR:  $\nu_{\max}$ , 3262, 3062, 1621, 1606, 1593, 1473, 1380, 1280, 1155, 755  $\text{cm}^{-1}$ . ESI-MS: M-32 (MeOH), 187. ESI-HRMS: calcd for.  $\text{C}_{11} \text{H}_{10} \text{O}_2 \text{N} = 188.0706$ . found: 188.0700.

3-((benzo[d]thiazol-2-ylimino)methyl)quinolin-4(1H)-one (**Q9**). Color & State: Yellow solid.

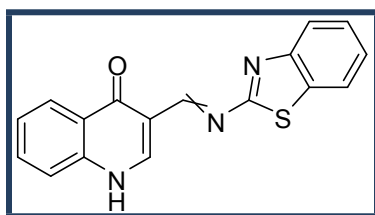

M.P.: 316-318  $^{\circ}\text{C}$ .  $^1\text{H}$  NMR ( $\text{DMSO-d}_6$ , 500 MHz):  $\delta$  10.19 (s, 1H), 8.47 (s, 1H), 8.21 (dd, 1H,  $J_1=7.9\text{Hz}$ ,  $J_2=1.2\text{Hz}$ ), 7.76 (t, 1H,  $J=8.4\text{Hz}$ ), 7.68-7.62 (m, 2H), 7.50-7.42 (m, 3H), 7.32 (d, 1H,  $J=7.5\text{Hz}$ ), 7.19 (t, 1H,  $J = 8.4\text{Hz}$ ), 6.99 (t, 1H,  $J=8.4\text{Hz}$ );  $^{13}\text{C}$  NMR ( $\text{DMSO-d}_6$ , 125 MHz):  $\delta$  188.7, 176.3, 166.4, 152.7, 143.3, 139.4, 133.1, 130.9, 127.7, 125.4, 125.4, 125.3, 120.8, 120.8,

119.4, 117.7, 116.3; ESI-MS: M+1, 306. ESI-HRMS: calcd for.  $\text{C}_{17} \text{H}_{12} \text{O}_3 \text{N}_3 \text{S} = 306.0696$ . found: 306.0696.

N-((1H-indol-3-yl)methylene)benzo[d]thiazol-2-amine (**Q10**): Color & State: Yellow solid.

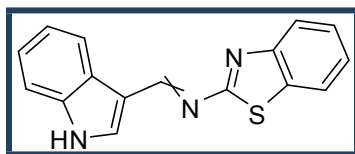

M.P.: 254-256  $^{\circ}\text{C}$ .  $^1\text{H}$  NMR ( $\text{DMSO-d}_6$ , 500 MHz):  $\delta$  12.28 (s, 1H), 9.25 (s, 1H), 8.39-8.33 (m, 2H), 7.99 (d, 1H,  $J = 7.9$  Hz), 7.85 (d, 1H,  $J = 7.9$  Hz), 7.55 (d, 1H,  $J = 6.9$  Hz), 7.46 (t, 1H,  $J = 8.2$  Hz), 7.37-7.26 (m, 3H);  $^{13}\text{C}$  NMR ( $\text{DMSO-d}_6$ , 75 MHz):  $\delta$  173.3, 161.1,

151.6, 138.6, 137.5, 133.4, 126.1, 124.5, 124.2, 123.6, 122.0, 121.9, 121.6, 114.3, 112.5; IR:

$\nu_{\max}$ , 3436, 3109, 3053, 2853, 1606, 1585, 1472, 143, 1238, 741  $\text{cm}^{-1}$ . ESI-MS: M+1, 277.  
ESI-HRMS: Calcd. for  $\text{C}_{16}\text{H}_{12}\text{N}_3\text{S}$  = 278.0746. Found: 278.0742.

*tert*-butyl 3-((4-chlorobenzo[d]thiazol-2-ylimino)methyl)-1H-indole-1-carboxylate (**Q11**):

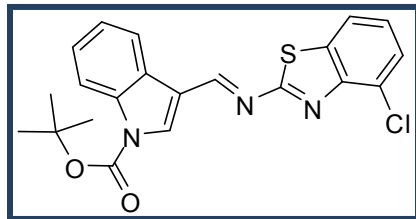

Color & State: Yellow solid. M.P.: 164-166 °C.  $^1\text{H}$  NMR ( $\text{CDCl}_3$ , 400 MHz):  $\delta$  9.30 (s, 1H), 8.57 (d, 1H,  $J = 7.1$  Hz), 8.25 (s, 1H), 8.18 (d, 1H,  $J = 7.8$  Hz), 7.72 (dd, 1H,  $J_1 = 7.9$  Hz,  $J_2 = 0.7$  Hz), 7.51-7.38 (m, 3H), 7.26 (s, 1H), 1.72 (s, 9H);  $^{13}\text{C}$  NMR ( $\text{CDCl}_3$ , 125 MHz):  $\delta$  173.5, 160.1, 148.9, 148.7, 136.2, 136.0, 135.4, 127.4, 126.8, 126.6, 126.1, 125.0, 124.4, 123.1,

120.1, 118.6, 115.1, 85.5, 28.1; IR:  $\nu_{\max}$ , 2925, 1740, 1617, 1474, 1453, 1373, 1235, 1097, 759  $\text{cm}^{-1}$ ; ESI-MS: M+1, 412.

(Z)-3-((benzo[d]thiazol-2-ylamino)methylene)-2-methoxychroman-4-one (**3aa**): Color & State : Lemon

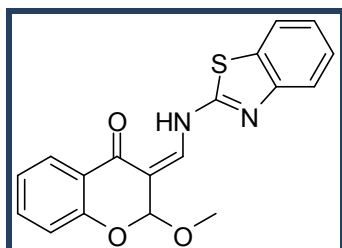

Yellow Solid. mp: 144-146 °C. <sup>1</sup>H NMR (CDCl<sub>3</sub>, 500 MHz): δ 12.29 (d, 1H, *J* = 10.9 Hz), 8.05-7.95 (m, 2H), 7.79-7.71 (m, 2H), 7.52 (t, 1H, *J* = 8.4 Hz), 7.43 (t, 1H, *J* = 7.9 Hz), 7.28 (t, 1H, *J* = 7.6 Hz), 7.13 (t, 1H, *J* = 7.5 Hz), 7.06 (d, 1H, *J* = 8.1 Hz), 5.72 (s, 1H), 3.54 (s, 3H); <sup>13</sup>C NMR (DMSO-*d*<sub>6</sub>, 75 MHz): δ 188.3, 174.9, 166.4, 163.4, 155.6, 152.7, 135.2, 130.9, 126.7, 125.4, 125.3, 124.6, 120.8, 120.0, 118.8, 117.7, 48.6; IR: *v*<sub>max</sub>, 2929, 1649, 1588, 1529, 1465, 1267, 1207, 1146, 1066, 1015, 967, 938, 752, 717 cm<sup>-1</sup>. EI-MS: M-H, 337.

EI-HRMS: calcd for. C<sub>18</sub> H<sub>14</sub> N<sub>2</sub> O<sub>3</sub> S = 338.0725. found: 338.0724.

(Z)-3-((6-bromobenzo[d]thiazol-2-ylamino)methylene)-2-methoxychroman-4-one (**3ab**): Color & State :

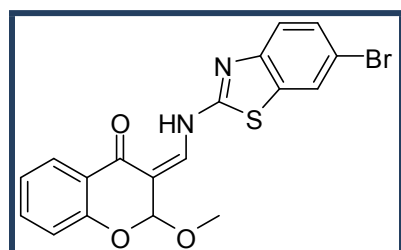

Yellow Solid. mp: 153-155 °C. <sup>1</sup>H NMR (DMSO-*d*<sub>6</sub>, 300 MHz): δ 10.11 (s, 1H), 8.91 (s, 1H), 8.15 (d, 1H, *J* = 7.9 Hz), 7.92-7.84 (m, 2H), 7.74 (d, 1H, *J* = 8.3 Hz), 7.63-7.55 (m, 3H), 7.32 (dd, 1H, *J*<sub>1</sub> = 8.7 Hz, *J*<sub>2</sub> = 1.9 Hz), 7.24 (d, 1H, *J* = 8.5 Hz), 3.16 (s, 3H); <sup>1</sup>H NMR (CDCl<sub>3</sub>, 500 MHz): δ 12.31 (d, 1H, *J* = 10.8 Hz), 7.98 (s, 1H), 7.97-7.95 (m, 1H), 7.85 (d, 1H, *J* = 1.8 Hz), 7.61 (d, 1H, *J* = 8.7 Hz), 7.55-7.50 (m, 2H), 7.14 (t, 1H, *J* = 7.9 Hz), 7.07 (d, 1H, *J* = 7.9 Hz), 5.71 (s, 1H), 3.54 (s, 3H); <sup>13</sup>C NMR

(DMSO-*d*<sub>6</sub>, 75 MHz): δ 188.3, 174.9, 167.1, 163.4, 155.6, 152.0, 135.2, 133.0, 128.2, 126.7, 125.3, 124.6, 123.2, 120.0, 119.1, 118.9, 112.1, 48.6; <sup>13</sup>C NMR (CDCl<sub>3</sub>, 125 MHz): δ 183.0, 160.5, 156.4, 150.1, 140.6, 135.5, 133.3, 130.1, 126.7, 123.9, 122.4, 122.3, 122.2, 118.3, 116.8, 108.0, 101.1, 55.8; IR: *v*<sub>max</sub>, 3082, 2926, 1648, 1590, 1530, 1473, 1412, 1372, 1270, 1221, 1147, 1062, 1021, 930, 811, 757 cm<sup>-1</sup>. EI-MS: M-32, 384. EI-HRMS: calcd for. C<sub>18</sub> H<sub>13</sub> <sup>81</sup>Br<sub>1</sub> N<sub>2</sub> O<sub>3</sub> S = 417.9810. found = 417.9807.

(Z)-2-methoxy-3-((6-methoxybenzo[d]thiazol-2-ylamino)methylene)chroman-4-one (**4ac**): Color & State :

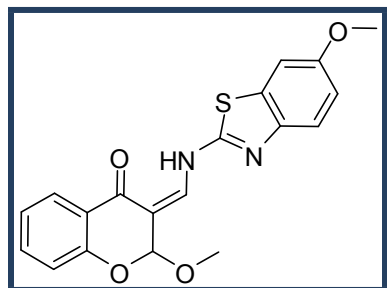

Yellow Solid. mp: 138-140 °C. <sup>1</sup>H NMR (DMSO-*d*<sub>6</sub>, 300 MHz): δ 10.11 (s, 1H), 8.91 (s, 1H), 8.15 (d, 1H, *J* = 7.2 Hz), 7.89 (t, 1H, *J* = 7.6 Hz), 7.75 (d, 1H, *J* = 8.3 Hz), 7.59 (t, 1H, *J* = 7.2 Hz), 7.29-7.17 (m, 3H), 6.80 (dd, 1H, *J*<sub>1</sub> = 8.9 Hz, *J*<sub>2</sub> = 2.3 Hz), 3.72 (s, 3H), 3.16 (s, 3H); <sup>13</sup>C NMR (DMSO-*d*<sub>6</sub>, 75 MHz): δ 188.5, 175.0, 164.9, 163.6, 155.7, 154.3, 146.8, 135.3, 131.9, 126.8, 125.4, 124.7, 120.0, 119.0, 118.1, 113.0, 105.6, 55.6, 48.7; IR: *v*<sub>max</sub>, 3422, 2919, 1647, 1605, 1536, 1466, 1367, 1257, 1223, 1185, 1067, 1014, 932, 830, 755 cm<sup>-1</sup>. EI-MS: M-32, 336. EI-HRMS:

calcd for. C<sub>19</sub> H<sub>16</sub> N<sub>2</sub> O<sub>4</sub> S = 368.0831. found = 368.0820.

(Z)-3-((4,6-difluorobenzo[d]thiazol-2-ylamino)methylene)-2-methoxychroman-4-one (**3ad**): Color & State :

Lemon Yellow Solid. mp: 228-230 °C. <sup>1</sup>H NMR (DMSO-*d*<sub>6</sub>, 300 MHz): δ 10.12 (s, 1H), 8.93 (s, 1H), 8.15 (dd, 1H, *J*<sub>1</sub> = 7.9 Hz, *J*<sub>2</sub> = 1.5 Hz), 7.89 (m, 1H), 7.76 (d, 1H, *J* = 7.9 Hz), 7.72-7.67 (brs, 2H), 7.62-7.55 (m, 1H),

7.51-7.45 (m, 1H), 7.15-7.06 (m, 1H), 3.16 (s, 3H); <sup>1</sup>H NMR (CDCl<sub>3</sub>, 500 MHz): δ 12.34 (d, 1H, *J* = 10.7 Hz), 8.03 (d, 1H, *J* = 10.7 Hz), 7.97 (dd, 1H, *J*<sub>1</sub> = 7.8 Hz, *J*<sub>2</sub> = 1.7 Hz), 7.55-7.50 (m, 1H), 7.26-7.24 (m, 1H), 7.14 (t, 1H, *J* = 7.9 Hz), 7.07 (d, 1H, *J* = 8.1 Hz), 6.99-6.93 (m, 1H), 5.72 (s, 1H), 7.53 (s, 3H); <sup>13</sup>C NMR (DMSO-d<sub>6</sub>, 75 MHz): δ 188.33, 174.9, 166.6, 163.4, 155.5, 154.5, 152.6, 149.1, 135.1, 133.8, 126.7, 125.2, 124.6, 122.2, 119.9, 118.8, 104.2, 104.1, 103.8, 103.7, 101.3, 101.0, 100.9, 100.6, 48.6; IR: ν<sub>max</sub>, 3446, 3086, 2928, 1648, 1612, 1544, 1468, 1422, 1372, 1260, 1220, 1147, 1070, 988, 927, 849, 747 cm<sup>-1</sup>. EI-MS: M-32, 342. EI-HRMS: calcd for. C<sub>18</sub> H<sub>12</sub> F<sub>2</sub> N<sub>2</sub> O S = 342.0638. found = 342.0635.

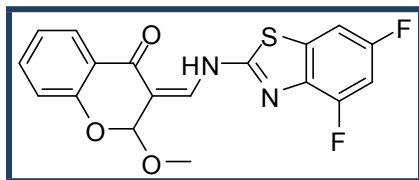

(Z)-3-((benzo[d]thiazol-2-ylamino)methylene)-6-chloro-2-methoxychroman-4-one (**3ae**): Color & State : Wheat Brown Solid. mp: 148-150 °C. <sup>1</sup>H NMR (DMSO-d<sub>6</sub>, 300 MHz): δ 10.09 (s, 1H), 8.96 (s, 1H), 8.07 (d, 1H, *J* = 2.5 Hz), 7.94 (dd, 1H, *J*<sub>1</sub> = 9.1 Hz, *J*<sub>2</sub> = 2.6 Hz), 7.83 (d, 1H, *J* = 8.9 Hz), 7.63 (d, 1H, *J* = 8.1 Hz), 7.46 (s, 1H), 7.32 (s, 1H, *J* = 7.7 Hz), 7.19 (t, 1H, *J* = 7.9 Hz), 6.99 (t, 1H, *J* = 7.7 Hz), 3.17 (s, 3H); <sup>13</sup>C NMR (DMSO-d<sub>6</sub>, 75 MHz): δ 188.0, 173.8, 166.4, 163.7, 161.2, 154.1, 134.9, 131.1, 130.8, 126.4, 125.8, 125.5, 125.3, 124.2, 122.0, 121.3, 121.0, 120.8, 120.4, 119.9, 117.6, 55.1, 48.6; IR: ν<sub>max</sub>, 2998, 1651, 1609, 1533, 1468, 1443, 1363, 1261, 1207, 1184, 1075, 1035, 977, 941, 753 cm<sup>-1</sup>; EI-HRMS: calcd for. C<sub>18</sub> H<sub>13</sub> Cl N<sub>2</sub> O<sub>3</sub> S = 372.0335. found: 372.0334.

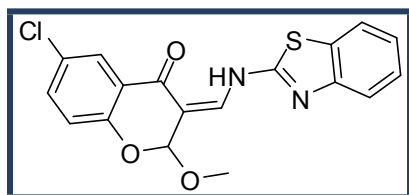

(Z)-3-((benzo[d]thiazol-2-ylamino)methylene)-6-bromo-2-methoxychroman-4-one (**3af**): Color & State: Green Solid. mp: 144-146 °C. <sup>1</sup>H NMR (DMSO-d<sub>6</sub>, 500 MHz): δ 10.09 (s, 1H), 8.96 (s, 1H), 8.21 (d, 1H, *J* = 2.4 Hz), 8.05 (dd, 1H, *J*<sub>1</sub> = 8.8 Hz, *J*<sub>2</sub> = 2.6 Hz), 7.77 (d, 1H, *J* = 8.85 Hz), 7.64 (dd, 1H, *J*<sub>1</sub> = 7.8 Hz, *J*<sub>2</sub> = 0.9 Hz), 7.45 (s, 1H), 7.32 (dd, 1H, *J*<sub>1</sub> = 8.1 Hz, *J*<sub>2</sub> = 0.6 Hz), 7.21-7.17 (m, 1H), 7.01-6.97 (m, 1H), 3.16 (s, 3H). <sup>13</sup>C NMR (DMSO-d<sub>6</sub>, 75 MHz): δ 187.8, 173.5, 166.3, 163.5, 154.4, 152.6, 137.5, 130.8, 127.2, 126.1, 125.3, 123.7, 121.3, 120.7, 119.9, 119.0, 117.6, 48.5; IR: ν<sub>max</sub>, 3062, 2927, 2825, 1651, 1604, 1589, 1527, 1466, 1440, 1370, 1260, 1209, 1148, 1065, 1031, 968, 932, 756 cm<sup>-1</sup>; EI-MS: M-32, 384. EI-HRMS: calcd for. C<sub>17</sub> H<sub>10</sub> <sup>79</sup>Br N<sub>2</sub> O<sub>2</sub> S = 384.9646. found: 384.9644.

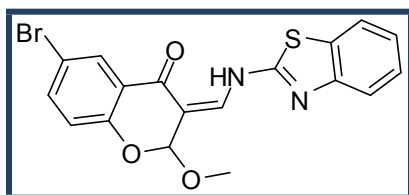

(Z)-6-chloro-2-methoxy-3-((6-methoxybenzo[d]thiazol-2-ylamino)methylene)chroman-4-one (**3ag**): Color & State: Greenish yellow solid. M.P.: 117-119 °C. <sup>1</sup>H NMR (CDCl<sub>3</sub>, 500MHz): δ 12.20 (d, 1H, *J* = 10.8 Hz), 7.98 (d, 1H, *J* = 11.1 Hz), 7.92 (d, 1H, *J* = 2.4 Hz), 7.66 (d, 1H, *J* = 8.8 Hz), 7.43 (dd, 1H, *J*<sub>1</sub> = 8.7 Hz, *J*<sub>2</sub> = 2.6 Hz), 7.05-6.98 (m, 2H), 5.60 (s, 1H), 3.86 (s, 3H), 3.51 (s, 3H); <sup>13</sup>C NMR (CDCl<sub>3</sub>, 100 MHz): δ 181.4, 157.7, 156.9, 154.6, 145.3, 141.7, 134.9, 133.0, 127.7, 126.1, 123.3, 121.7,

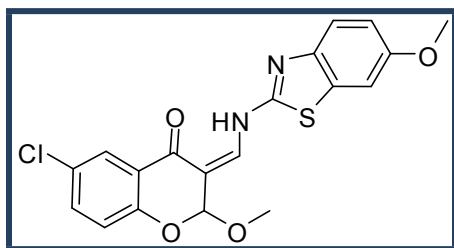

119.8, 115.2, 106.5, 104.8, 101.4, 55.8, 55.8; IR:  $\nu_{\max}$ , 3439, 2923, 1652, 1605, 1591, 1462, 1255, 1065, 802  $\text{cm}^{-1}$ . ESI-HRMS: calcd for.  $\text{C}_{18}\text{H}_{12}\text{ClN}_2\text{O}_3\text{S}$ : 371.02572. found: 371.02483.

(Z)-6-chloro-2-methoxy-3-((6-(trifluoromethoxy)benzo[d]thiazol-2-ylamino)methylene)chroman-4-one

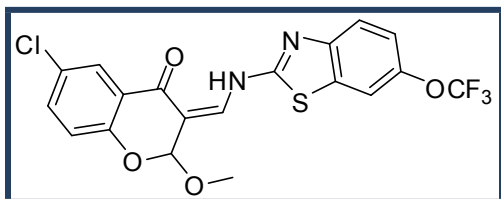

(3ah): Color & State : Yellow Solid. mp: 148-150 °C.  $^1\text{H}$  NMR (DMSO- $d_6$ , 300 MHz):  $\delta$  10.10 (s, 1H), 8.92 (s, 1H), 8.07 (d, 1H,  $J$  = 2.6 Hz), 7.90 (dd, 1H,  $J_1$  = 9.1 Hz,  $J_2$  = 1.7 Hz), 7.80 (d, 1H,  $J$  = 9.1 Hz), 7.70 (brs, 1H), 7.59 (s, 2H), 7.34 (d, 1H,  $J$  = 8.7 Hz), 7.14 (d, 1H,  $J$  = 8.5 Hz), 4.12 (brs, 1.5 H), 3.16 (s, 1.5H);  $^{13}\text{C}$  NMR (DMSO- $d_6$ , 125 MHz):  $\delta$  187.9, 173.8, 167.7, 163.5,

154.2, 151.8, 142.1, 134.9, 131.9, 131.3, 125.9, 124.3, 121.3, 119.9, 119.2, 118.8, 117.9, 114.3, 114.2, 48.6; IR:  $\nu_{\max}$ , 3215, 2927, 1655, 1606, 1531, 1459, 1423, 1259, 1202, 1160, 1065, 1028, 933, 817  $\text{cm}^{-1}$ ; EI-MS: M-32, 424. EI-HRMS: calcd for.  $\text{C}_{18}\text{H}_8\text{ClF}_3\text{N}_2\text{O}_3\text{S}$  = 423.9896. found = 423.9892.

(Z)-6-chloro-3-((4,6-difluorobenzo[d]thiazol-2-ylamino)methylene)-2-methoxychroman-4-one (3ai):

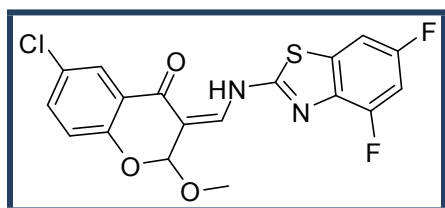

Color & State : Yellow Solid. mp: 170-172 °C.  $^1\text{H}$  NMR (DMSO- $d_6$ , 300 MHz):  $\delta$  10.09 (s, 1H), 8.95 (s, 1H), 8.07 (d, 1H,  $J$  = 2.5 Hz), 7.94 (dd, 1H,  $J_1$  = 9.1 Hz,  $J_2$  = 2.6 Hz), 7.83 (d, 1H,  $J$  = 8.9 Hz), 7.69 (brs, 1H), 7.48 (dd, 1H,  $J_1$  = 8.3 Hz,  $J_2$  = 1.5 Hz), 7.16-7.06 (m, 1H), 3.16 (s, 3H);  $^{13}\text{C}$  NMR (DMSO- $d_6$ , 75 MHz):  $\delta$  188.0, 173.8, 166.6, 163.7, 154.1, 134.9, 133.8, 133.7, 133.6, 133.5, 131.1, 125.8,

124.2, 123.9, 121.3, 119.9, 104.1, 104.1, 103.8, 103.7, 101.2, 101.0, 100.9, 100.6, 48.5; IR:  $\nu_{\max}$ , 3423, 3093, 2931, 1652, 1606, 1585, 1537, 1466, 1426, 1353, 1260, 1204, 1144, 1060, 983, 931, 851,  $\text{cm}^{-1}$ . EI-MS: M-32, 376. EI-HRMS: calcd for.  $\text{C}_{18}\text{H}_{11}\text{ClF}_2\text{N}_2\text{O}_3\text{S}$  = 408.0147. found = 408.0144.

(Z)-3-((6-bromobenzo[d]thiazol-2-ylamino)methylene)-6-chloro-2-methoxychroman-4-one (3aj): Color &

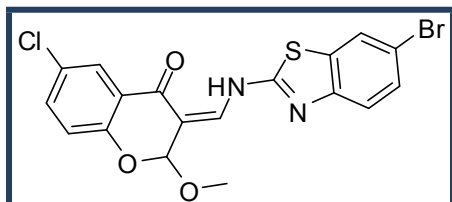

State : Yellow Solid. mp: 164-166 °C.  $^1\text{H}$  NMR (DMSO- $d_6$ , 300 MHz):  $\delta$  10.08 (s, 1H), 8.93 (s, 1H), 8.06 (d, 1H,  $J$  = 2.6 Hz), 7.95-7.78 (m, 3H), 7.61 (s, 1H), 7.33 (dd, 1H,  $J_1$  = 8.5 Hz,  $J_2$  = 2.1 Hz), 7.24 (d, 1H,  $J$  = 8.7 Hz), 3.16 (s, 3H);  $^{13}\text{C}$  NMR (DMSO- $d_6$ , 75 MHz):  $\delta$  188.2, 167.3, 164.0, 154.3, 152.0, 135.1, 133.1, 131.3, 128.4, 126.0, 124.4, 123.4, 121.5, 120.0, 119.2, 112.2, 48.7; IR:

$\nu_{\max}$ , 3056, 2904, 1656, 1605, 1587, 1529, 1419, 1365, 1260, 1205, 1142, 1064, 1030, 975, 815, 732  $\text{cm}^{-1}$ ; EI-MS: M-32, 418. EI-HRMS: calcd for.  $\text{C}_{17}\text{H}_8\text{BrClN}_2\text{O}_2\text{S}$  = 417.9178. found = 417.9177.

(Z)-6-chloro-2-methoxy-3-((6-methylbenzo[d]thiazol-2-ylamino)methylene)chroman-4-one (**3ak**): Color

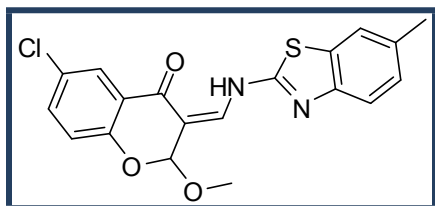

& State : Lemon Yellow Solid. mp: 149-151 °C. <sup>1</sup>H NMR (DMSO-d<sub>6</sub>, 300 MHz): δ 10.09 (s, 1H), 8.94 (s, 1H), 8.08 (d, 1H, *J* = 2.5 Hz), 7.94 (dd, 1H, *J*<sub>1</sub> = 8.9 Hz, *J*<sub>2</sub> = 2.6 Hz), 7.83 (d, 1H, *J* = 8.9 Hz), 7.43 (s, 1H), 7.31 (s, 1H), 7.20 (d, 1H, *J* = 8.1 Hz), 7.00 (dd, 1H, *J*<sub>1</sub> = 7.0 Hz, *J*<sub>2</sub> = 0.9 Hz), 3.16 (s, 3H), 2.30 (s, 3H); <sup>13</sup>C NMR (DMSO-d<sub>6</sub>, 75 MHz): δ 188.1, 173.9, 165.9, 163.9, 154.2, 150.4, 135.0, 131.3, 130.9, 130.1, 127.8, 126.5, 125.9, 124.3, 121.7, 121.4, 121.1, 120.9, 120.0, 117.4, 48.7, 21.0, 20.8; IR: ν<sub>max</sub>, 3423, 2916, 1654, 1605, 1592, 1526, 1470, 1420, 1371, 1260, 1204, 1183, 1064, 1029, 980, 935, 809 cm<sup>-1</sup>; EI-MS: M-32, 354. EI-HRMS: calcd for. C<sub>18</sub> H<sub>10</sub> Cl N<sub>2</sub> O<sub>2</sub> S = 353.0151. found = 353.0151.

(Z)-6-bromo-3-((6-bromobenzo[d]thiazol-2-ylamino)methylene)-2-methoxychroman-4-one (**3al**): Color &

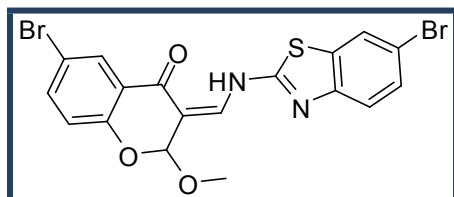

State : Greenish Solid. mp: 168-170 °C. <sup>1</sup>H NMR (DMSO-d<sub>6</sub>, 300 MHz): δ 10.09 (s, 1H), 8.95 (s, 1H), 8.20 (d, 1H, *J* = 2.5 Hz), 8.04 (dd, 1H, *J*<sub>1</sub> = 8.9 Hz, *J*<sub>2</sub> = 2.5 Hz), 7.88 (d, 1H, *J* = 1.9 Hz), 7.76 (d, 1H, *J* = 8.9 Hz), 7.61 (s, 1H), 7.33 (dd, 1H, *J*<sub>1</sub> = 8.5 Hz, *J*<sub>2</sub> = 2.1 Hz), 7.24 (d, 1H, *J* = 8.5 Hz), 3.17 (s, 3H); <sup>13</sup>C NMR (DMSO-d<sub>6</sub>, 75 MHz): δ 187.9, 173.6, 167.1, 163.6, 154.5, 151.9, 137.6, 133.0, 128.2, 127.3, 126.1, 123.2, 121.4, 119.9, 119.1, 119.0, 112.0, 48.5; IR: ν<sub>max</sub>, 3056, 2905, 1657, 1601, 1586, 1528, 1466, 1436, 1366, 1261, 1203, 1142, 1067, 1027, 974, 940, 815 cm<sup>-1</sup>; EI-MS: M-32, 462. EI-HRMS: calcd for. C<sub>17</sub> H<sub>8</sub> <sup>79</sup>Br<sub>2</sub> N<sub>2</sub> O<sub>2</sub> S = 461.8673. found = 461.8672.

(Z)-6-bromo-3-((4,6-difluorobenzo[d]thiazol-2-ylamino)methylene)-2-methoxychroman-4-one (**3am**):

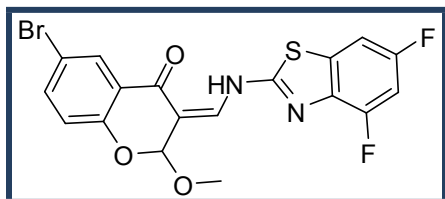

Color & State : Wheat Brown Solid. mp: 219-221 °C. <sup>1</sup>H NMR (DMSO-d<sub>6</sub>, 300 MHz): δ 10.08 (s, 1H), 8.93 (s, 1H), 8.20 (d, 1H, *J* = 2.5 Hz), 8.04 (dd, 1H, *J*<sub>1</sub> = 8.9 Hz, *J*<sub>2</sub> = 2.5 Hz), 7.75 (d, 1H, *J* = 8.9 Hz), 7.69 (s, 1H), 7.50-7.44 (m, 1H), 7.15-7.05 (m, 1H), 3.16 (s, 3H); <sup>13</sup>C NMR (DMSO-d<sub>6</sub>, 75 MHz): δ 188.1, 173.8, 166.7, 163.8, 154.6, 137.7, 133.8, 133.7, 133.7, 127.4, 126.2, 121.5, 120.0, 119.2, 104.3, 104.2, 103.9, 101.4, 101.1, 101.0, 48.6; IR: ν<sub>max</sub>, 3089, 2937, 1652, 1602, 1587, 1537, 1463, 1426, 1354, 1259, 1202, 1145, 1062, 1030, 981, 933 cm<sup>-1</sup>; EI-MS: M-32, 420. EI-HRMS: calcd for. C<sub>18</sub> H<sub>11</sub> <sup>81</sup>Br<sub>1</sub> F<sub>2</sub> N<sub>2</sub> O<sub>3</sub> S = 453.9621. found = 453.9615.

(Z)-6-bromo-3-((6-chloro-4-fluorobenzo[d]thiazol-2-ylamino)methylene)-2-methoxychroman-4-one

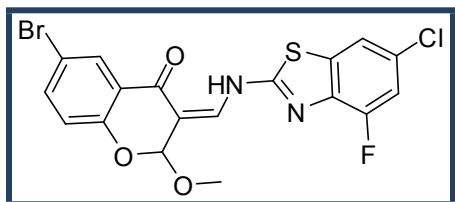

(**3an**): Color & State : Brown Solid. mp: 217-219 °C. <sup>1</sup>H NMR (DMSO-d<sub>6</sub>, 300 MHz): δ 10.09 (s, 1H), 8.95 (s, 1H), 8.19 (d, 1H, *J*<sub>1</sub> = 2.4 Hz), 8.04 (dd, 1H, *J*<sub>1</sub> = 8.9 Hz, *J*<sub>2</sub> = 2.6 Hz), 7.82-7.74 (m, 2H), 7.68-7.66 (brs, 1H), 7.45 (d, 1H, *J* = 6.6 Hz), 3.17 (s, 3H); <sup>13</sup>C NMR (DMSO-d<sub>6</sub>, 75 MHz): δ 188.0, 173, 167.7, 163.6, 154.5, 153.5,



149.9, 137.6, 130.5, 127.3, 126.2, 121.4, 120.0, 119.1, 117.8, 109.2, 108.8, 48.5; IR:  $\nu_{\max}$ , 3422, 2935, 1649, 1604, 1542, 1453, 1363, 1230, 1204, 1074, 1034, 972, 941, 869, 819, 712  $\text{cm}^{-1}$ ; EI-MS: M-32, 436. EI-HRMS: calcd for.  $\text{C}_{17}\text{H}_7^{79}\text{Br}_1\text{Cl F N}_2\text{O}_2\text{S} = 435.9084$ . found = 435.9084.

(Z)-6-hydroxy-2-methoxy-3-((6-methoxybenzo[d]thiazol-2-ylamino)methylene)chroman-4-one (**3ao**):

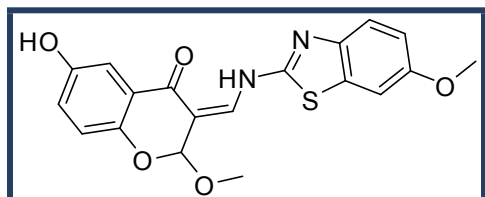

Color & State: Yellow. M.P.: 162-164 °C.  $^1\text{H}$  NMR ( $\text{DMSO-d}_6$ , 500 MHz):  $\delta$  12.28 (s, 1H), 9.06 (s, 1H), 7.91 (s, 1H), 7.68-7.59 (m, 1H), 7.52-7.48 (m, 1H), 7.36 (d, 1H,  $J=3.1$  Hz), 7.26 (s, 1H), 7.07-6.98 (m, 2H), 6.93-6.88 (m, 1H), 5.66 (s, 1H), 3.86 (s, 1H), 3.50 (s, 1H);  $^{13}\text{C}$  NMR ( $\text{CDCl}_3+\text{DMSO-d}_6$  (3:1), 75 MHz):  $\delta$  181.9, 157.6, 156.1, 151.8, 148.7, 144.6, 140.3, 132.3, 122.9, 122.0,

120.8, 118.3, 114.3, 110.4, 106.8, 104.3, 100.3, 55.2, 54.8; ESI-HRMS: calcd for.  $\text{C}_{19}\text{H}_{15}\text{O}_5\text{N}_2\text{S}$  : 383.0696. found: 383.0710.

(Z)-8-bromo-6-chloro-3-((4-chlorobenzo[d]thiazol-2-ylamino)methylene)-2-methoxychroman-4-one

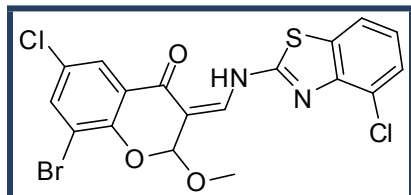

(**3ap**): Color & State : Lemon Yellow Solid. mp: 209-211 °C.  $^1\text{H}$  NMR ( $\text{DMSO-d}_6$ , 300 MHz):  $\delta$  10.08 (s, 1H), 9.04 (s, 1H), 8.37 (d, 1H,  $J = 2.5$  Hz), 8.07 (d, 1H,  $J = 2.5$  Hz), 7.8 (s, 1H), 7.62 (dd, 1H,  $J_1 = 7.7$  Hz,  $J_2 = 0.9$  Hz), 7.27 (dd, 1H,  $J_1 = 7.9$  Hz,  $J_2 = 0.9$  Hz), 6.98 (t, 1H,  $J = 7.9$  Hz), 3.17 (s, 3H).  $^{13}\text{C}$  NMR ( $\text{DMSO-d}_6$ , 75 MHz):  $\delta$  187.8, 167.3,

163.8, 151.3, 149.4, 137.4, 132.1, 131.3, 126.9, 125.5, 124.0, 121.4, 121.2, 120.0, 119.8, 113.3, 48.6; IR:  $\nu_{\max}$ , 3447, 3066, 2932, 1650, 1598, 1528, 1452, 1363, 1274, 1225, 1183, 1059, 970 935, 875, 817, 769, 711  $\text{cm}^{-1}$ . EI-MS: M-32 (MeOH), 452. EI-HRMS: calcd for.  $\text{C}_{17}\text{H}_7^{79}\text{Br Cl}_2\text{N}_2\text{O}_2\text{S} = 451.8789$ . found = 451.8786.

(Z)-3-((benzo[d]thiazol-2-ylamino)methylene)-2-ethoxychroman-4-one (**3aq**). Color & State: Yellow solid.

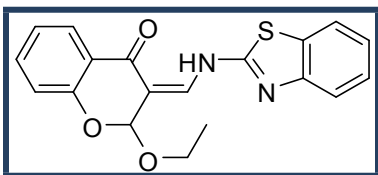

M.P.: 133-135 °C.  $^1\text{H}$  NMR ( $\text{CDCl}_3$ , 500 MHz):  $\delta$  12.31 (d, 1H,  $J = 10.8$  Hz), 8.02 (d, 1H,  $J = 11.0$  Hz), 7.98 (dd, 1H,  $J_1 = 7.9$  Hz,  $J_2 = 1.5$  Hz), 7.77 (d, 1H,  $J = 8.1$  Hz), 7.73 (d, 1H,  $J = 7.9$  Hz), 7.51 (t, 1H,  $J = 8.5$  Hz), 7.43 (t, 1H,  $J = 8.2$  Hz), 7.30-7.27 (m, 1H), 7.13 (t, 1H,  $J = 7.6$  Hz), 7.04 (d, 1H,  $J = 8.1$  Hz), 5.83 (s, 1H), 3.95-3.87 (m, 1H), 8.78-8.70 (m, 1H),

1.21 (t, 3H,  $J = 7.2$  Hz);  $^{13}\text{C}$  NMR ( $\text{CDCl}_3$ , 125 MHz):  $\delta$  183.1, 160.3, 156.5, 151.2, 140.8, 135.3, 131.8, 126.7, 126.6, 124.0, 122.4, 122.2, 121.4, 121.1, 118.2, 107.8, 100.0, 64.1, 15.0; IR:  $\nu_{\max}$ , 3447, 2972, 2915, 1648, 1608, 1522, 1472, 1371, 1270, 1078, 754  $\text{cm}^{-1}$ . ESI-MS:  $\text{M}^{1+}$ , M-OEt, 307. EI-HRMS: calcd for.  $\text{C}_{17}\text{H}_{11}\text{O}_2\text{N}_2\text{S} = 307.0536$ . found: 307.0535.

(Z)-2-methoxy-3-((6-methoxybenzo[d]thiazol-2-ylamino)methylene)chroman-4-one (**3ar**). Color & State:

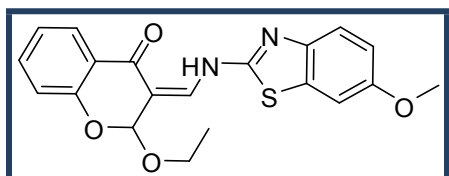

Yellow solid. M.P.: 150-152 °C. <sup>1</sup>H NMR (DMSO-d<sub>6</sub>, 300 MHz): δ 10.11 (s, 1H), 8.91 (s, 1H), 8.15 (dd, 1H, *J*<sub>1</sub> = 7.9 Hz, *J*<sub>2</sub> = 1.5 Hz), 7.89 (t, 1H, *J* = 8.7 Hz), 7.75 (d, 1H, *J* = 1.2 Hz), 7.59 (t, 1H, *J* = 7.9 Hz), 7.29-7.17 (m, 4H), 6.80 (dd, 1H, *J*<sub>1</sub> = 8.7 Hz, *J*<sub>2</sub> = 2.6 Hz), 3.83-3.69 (m, 5H), 1.05 (t, 3H, *J* = 7.0 Hz); <sup>13</sup>C NMR (DMSO-d<sub>6</sub>, 75

MHz): δ 188.4, 164.8, 163.5, 155.6, 154.3, 146.8, 135.2, 131.9, 126.8, 125.3, 124.7, 120.0, 118.9, 118.1, 112.9, 105.5, 56.1, 55.5, 18.5; IR: ν<sub>max</sub>, 3447, 3134, 2929, 1647, 1603, 1468. 1371, 1258, 1221, 1066, 1015, 751 cm<sup>-1</sup>. EI-MS: M-OEt, 337. EI-HRMS: calcd for. C<sub>18</sub> H<sub>13</sub> O<sub>3</sub> N<sub>2</sub> S = 337.0641. found: 337.0633.

(Z)-3-((4-chlorobenzo[d]thiazol-2-ylamino)methylene)-2-ethoxychroman-4-one (**3as**): Color & State :

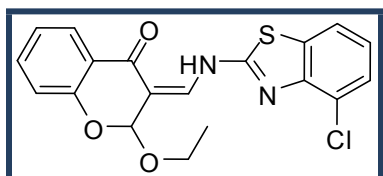

Lemon Yellow Solid. mp: 154-156 °C. <sup>1</sup>H NMR (CDCl<sub>3</sub>, 500 MHz): δ 12.39 (d, 1H, *J* = 11.0 Hz), 8.05 (d, 1H, *J* = 11.0 Hz), 7.97 (dd, 1H, *J*<sub>1</sub> = 7.8 Hz, *J*<sub>2</sub> = 1.7 Hz), 7.62 (dd, 1H, *J*<sub>1</sub> = 7.9 Hz, *J*<sub>2</sub> = 1.1 Hz), 7.54-7.49 (m, 1H), 7.45 (dd, 1H, *J*<sub>1</sub> = 7.9 Hz, *J*<sub>2</sub> = 0.9 Hz), 5.85 (s, 1H), 3.95-3.88 (m, 1H), 3.79-3.71 (m, 1H), 1.21 (t, 3H, *J* = 7.2 Hz); <sup>13</sup>C NMR (CDCl<sub>3</sub>, 125

MHz): δ 183.1, 160.7, 156.5, 148.2, 140.4, 135.4, 132.8, 126.9, 126.6, 125.7, 124.4, 122.2, 122.2, 119.8, 118.2, 108.2, 99.9, 64.1, 15.0; IR: ν<sub>max</sub>, 3447, 2969, 2911, 1646, 1606, 1524, 1468, 1366, 1256, 1216, 1147, 1070, 1011 cm<sup>-1</sup>; LC-MS: M-45, i.e. M-OEt, 341. HRMS: calcd. for. C<sub>17</sub> H<sub>10</sub> O<sub>2</sub> N<sub>2</sub> Cl S : 341.0146. found: 341.0147.

(Z)-6-bromo-2-ethoxy-3-((6-methylbenzo[d]thiazol-2-ylamino)methylene)chroman-4-one (**3at**): Color &

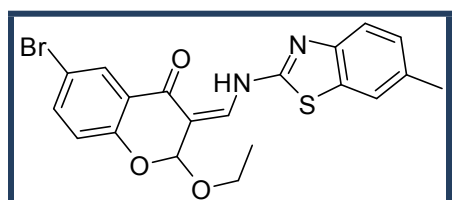

State: Yellow Solid. M.P.: 140-142 °C. <sup>1</sup>H NMR (CDCl<sub>3</sub>, 500 MHz): δ 12.20 (d, 1H, *J* = 10.9 Hz), 8.07 (d, 1H, *J* = 2.6 Hz), 8.00 (d, 1H, *J* = 11.1 Hz), 7.65 (d, 1H, *J* = 8.2 Hz), 7.57 (dd, 1H, *J*<sub>1</sub> = 8.7 Hz, *J*<sub>2</sub> = 2.6 Hz), 7.54 (s, 1H), 7.26-7.22 (m, 1H), 6.93 (d, 1H, *J* = 8.7 Hz), 5.81 (s, 1H), 3.92-3.84 (m, 1H), 3.76-3.68 (m, 1H), 2.46 (s, 3H), 1.20 (t, 3H, *J* = 7.0 Hz); <sup>13</sup>C NMR (DMSO-d<sub>6</sub>, 75 MHz): δ 188.0,

163.7, 154.5, 137.6, 129.8, 127.3, 126.3, 121.5, 121.0, 120.7, 120.0, 117.3, 55.9, 20.7, 18.5; IR: ν<sub>max</sub>, 3222, 3059, 2971, 2917, 1647, 1598, 1525, 1461, 1262, 1200, 1070, 952, 811 cm<sup>-1</sup>. EI-MS: M-OEt, 399. EI-HRMS: calcd for. C<sub>18</sub> H<sub>12</sub> O<sub>2</sub> N<sub>2</sub> Br S = 398.9797. found: 398.9790.

(Z)-6-chloro-3-((4-chlorobenzo[d]thiazol-2-ylamino)methylene)-2-propoxychroman-4-one (**3au**): Color

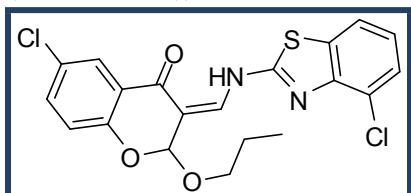

& State: Yellow solid. M.P.: 256-258 °C. <sup>1</sup>H NMR (CDCl<sub>3</sub>, 400 MHz): δ 12.28 (d, 1H, *J* = 11.0 Hz), 8.05 (d, 1H, *J* = 11.0 Hz), 7.90 (d, 1H, *J* = 2.6 Hz), 7.62 (dd, 1H, *J*<sub>1</sub> = 7.9 Hz, *J*<sub>2</sub> = 1.0 Hz), 7.47-7.41 (m, 2H), 7.20 (t, 1H, *J* = 7.8 Hz), 6.99 (d, 1H, *J* = 8.8 Hz), 5.83 (s, 1H), 3.82-3.75 (m, 1H), 3.67-3.60 (m, 1H), 1.58 (sex, 2H, *J*

= 7.1 Hz), 0.85 (t, 3H,  $J = 7.5$  Hz);  $^{13}\text{C}$  NMR ( $\text{CDCl}_3$ , 100 MHz):  $\delta$  182.1, 160.6, 155.0, 148.2, 140.9, 135.1, 132.9, 127.6, 127.0, 126.1, 125.9, 124.6, 123.3, 119.9, 107.9, 100.2, 70.5, 22.7, 10.5; IR:  $\nu_{\text{max}}$ , 3457, 2962, 2935, 2875, 1647, 1606, 1586, 1525, 1466, 1420, 1255, 1204, 1105, 1071, 949, 812  $\text{cm}^{-1}$ . ESI: M-59 (M-Propoxy), 375. ESI-HRMS: Calcd. for  $\text{C}_{17}\text{H}_9\text{O}_2\text{N}_2\text{Cl}_2\text{S}$  = 374.9756. Found 374.9752.

(Z)-2-butoxy-6-chloro-3-((4-chlorobenzo[d]thiazol-2-ylamino)methylene)chroman-4-one (**3av**): Color &

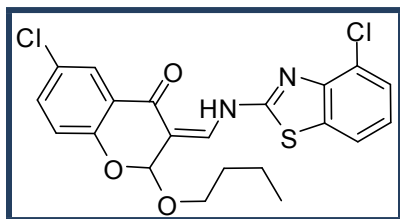

State: Pale yellow solid. M.P.: 259-261 °C.  $^1\text{H}$  NMR ( $\text{CDCl}_3$ , 400 MHz):  $\delta$  12.27 (d, 1H,  $J = 10.9$  Hz), 8.04 (d, 1H,  $J = 11.0$  Hz), 7.91 (d, 1H,  $J = 2.7$  Hz), 7.62 (dd, 1H,  $J_1 = 7.9$  Hz,  $J_2 = 0.7$  Hz), 7.47-7.42 (m, 2H), 7.21 (t, 1H,  $J = 7.9$  Hz), 6.99 (d, 1H,  $J = 8.7$  Hz), 5.82 (s, 1H), 3.87-3.79 (m, 1H), 3.71-3.63 (m, 1H), 1.58-1.50 (m, 2H), 1.34-1.25 (m, 2H), 0.87 (t, 3H,  $J = 7.5$  Hz);  $^{13}\text{C}$  NMR ( $\text{CDCl}_3$ , 100 MHz):  $\delta$  182.1, 160.6, 155.0, 148.2, 140.9, 135.1, 132.9, 127.6, 127.0, 126.1, 125.9, 124.6, 123.3, 119.9, 107.9, 100.2, 68.6, 31.4, 29.7, 19.2, 13.7; IR:  $\nu_{\text{max}}$ , 3448, 2958, 2958, 2926, 2870, 1648, 1606, 1528, 1467, 1257, 1206, 1076, 947, 768  $\text{cm}^{-1}$ ; ESI-MS: M-73 (M-Butoxy), 375. ESI-HRMS: Calcd. for  $\text{C}_{17}\text{H}_9\text{O}_2\text{N}_2\text{Cl}_2\text{S}$  = 374.9756. Found: 374.9751.

(Z)-2-butoxy-6-chloro-3-((6-methoxybenzo[d]thiazol-2-ylamino)methylene)chroman-4-one (**3aw**). Color

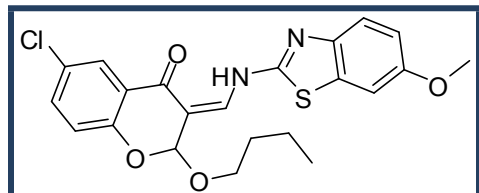

& State: Yellow solid. M.P.: 144-146 °C.  $^1\text{H}$  NMR ( $\text{CDCl}_3$ , 500 MHz):  $\delta$  12.21 (d, 1H,  $J = 11.0$ ), 7.96 (d, 1H,  $J = 11.1$  Hz), 7.92 (d, 1H,  $J = 2.6$  Hz), 7.66 (d, 1H,  $J = 8.8$  Hz), 7.43 (dd, 1H,  $J_1 = 8.7$  Hz,  $J_2 = 2.6$  Hz), 7.23 (d, 1H,  $J = 2.3$  Hz), 7.03 (dd, 1H,  $J_1 = 9.0$  Hz,  $J_2 = 2.4$  Hz), 6.98 (d, 1H,  $J = 8.7$  Hz), 5.79 (s, 1H), 3.90-3.78 (m, 4H), 3.69-3.62 (m, 1H), 1.56-1.50 (m, 1H), 1.33-1.23 (m, 3H), 0.87 (t, 3H,  $J = 7.5$  Hz);  $^{13}\text{C}$  NMR ( $\text{CDCl}_3$ , 100 MHz):  $\delta$  181.7, 157.9, 156.9, 154.9, 145.3, 141.4, 134.9, 133.0, 127.6, 126.1, 123.4, 121.7, 119.8, 115.2, 106.9, 104.9, 100.4, 68.5, 55.8, 31.4, 19.2, 13.7; IR:  $\nu_{\text{max}}$ , 3459, 2953, 2877, 1649, 1604, 1536, 1468, 12577, 1203, 1082, 962  $\text{cm}^{-1}$ . ESI-MS: M-73 (M-Butoxy), 371. ESI-HRMS: Calcd. for  $\text{C}_{18}\text{H}_{12}\text{O}_3\text{N}_2\text{Cl}\text{S}$  = 371.0252. Found: 371.0248.

(Z)-6-chloro-3-((4-chlorobenzo[d]thiazol-2-ylamino)methylene)-2-(hexyloxy)chroman-4-one (**3ax**):

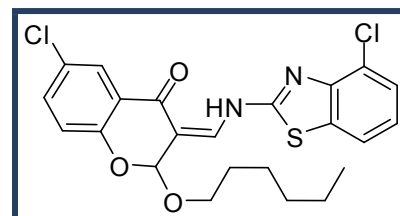

Color & State: Greenish yellow solid. M.P.: 132-134 °C and 270 °C.  $^1\text{H}$  NMR ( $\text{CDCl}_3$ , 400 MHz):  $\delta$  12.28 (d, 1H,  $J = 10.9$  Hz), 8.05 (d, 1H,  $J = 11.0$  Hz), 7.91 (d, 1H,  $J = 2.6$  Hz), 7.63 (dd, 1H,  $J_1 = 7.9$  Hz,  $J_2 = 0.7$  Hz), 7.47-7.42 (m, 2H), 7.21 (t, 1H,  $J = 7.9$  Hz), 6.99 (d, 1H,  $J = 8.7$  Hz), 5.82 (s, 1H), 3.86-3.78 (m, 1H), 3.71-3.63 (m, 1H), 1.58-1.50 (m, 2H), 1.29-1.19 (m, 6H), 0.85 (t, 3H,  $J = 7.0$  Hz);  $^{13}\text{C}$  NMR ( $\text{CDCl}_3$ , 100 MHz):  $\delta$  182.1, 160.6, 155.0, 148.2, 140.9, 135.1, 132.9, 127.6, 127.0, 126.1, 125.9, 124.6, 123.3, 119.9, 107.9, 100.2, 68.9, 31.4, 29.3, 25.7, 22.5, 14.0; IR:  $\nu_{\text{max}}$ , 3445, 2928, 2862, 1643, 1606, 1529, 1468, 1272, 1258, 1206, 1077, 953, 734  $\text{cm}^{-1}$ . ESI: M-101 (M-Hexyloxy), 375. ESI-HRMS: Calcd. for  $\text{C}_{17}\text{H}_9\text{O}_2\text{N}_2\text{Cl}_2\text{S}$  = 374.9756. Found : 374.9752.

(Z)-6-chloro-3-((4-chlorobenzo[d]thiazol-2-ylamino)methylene)-2-(heptyloxy)chroman-4-one (**3ay**):

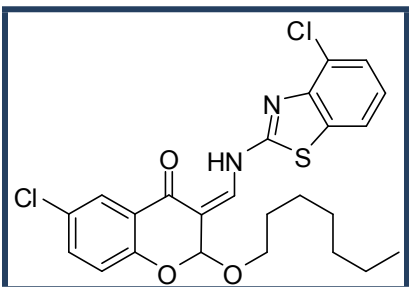

Color & State: Yellow solid. M.P.: 124-126 °C. <sup>1</sup>H NMR (CDCl<sub>3</sub>, 400 MHz): δ 12.28 (d, 1H, *J* = 11.0 Hz), 8.04 (d, 1H, *J* = 10.9 Hz), 7.91 (d, 1H, *J* = 2.6 Hz), 7.63 (dd, 1H, *J*<sub>1</sub> = 7.9 Hz, *J*<sub>2</sub> = 1.0 Hz), 7.47-7.41 (m, 2H), 7.21 (t, 1H, *J* = 7.8 Hz), 6.99 (d, 1H, *J* = 8.8 Hz), 5.82 (d, 1H), 3.85-3.78 (m, 1H), 3.70-3.63 (m, 1H), 1.58-1.50 (m, 1H), 1.31-1.16 (m, 9H), 0.85 (t, 3H, *J* = 7.1 Hz); <sup>13</sup>C NMR (CDCl<sub>3</sub>, 100 MHz): δ 182.1, 160.6, 155.0, 148.2, 140.9, 135.1, 132.9, 127.6, 127.0, 126.1, 125.9, 124.6, 123.3, 119.9, 107.9, 100.2, 68.9, 31.7, 29.7, 29.4, 28.9, 26.0, 22.5, 14.0; IR: ν<sub>max</sub>, 3456, 2924, 2853, 1639, 1606, 1525, 1469, 1420, 1340, 1258, 1202, 767 cm<sup>-1</sup>; ESI-MS: M-115 (M-Heptyloxy), 375. ESI-HRMS: Calcd. for C<sub>17</sub> H<sub>9</sub> O<sub>2</sub> N<sub>2</sub> Cl<sub>2</sub> S = 374.9756. Found: 374.9753.

(Z)-6-chloro-3-((4-chlorobenzo[d]thiazol-2-ylamino)methylene)-2-(octyloxy)chroman-4-one (**3az**):

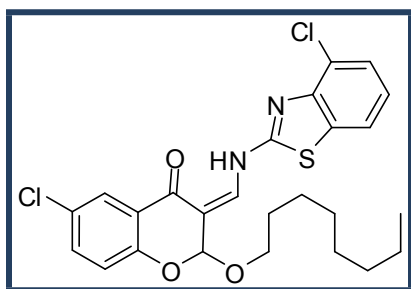

Color & State: Yellow solid. M.P.: 113-115 °C. <sup>1</sup>H NMR (CDCl<sub>3</sub>, 400 MHz): δ 12.25 (d, 1H, *J* = 10.9 Hz), 8.03 (d, 1H, *J* = 11.0 Hz), 7.91 (d, 1H, *J* = 2.7 Hz), 7.62 (dd, 1H, *J*<sub>1</sub> = 7.9 Hz, *J*<sub>2</sub> = 1.0 Hz), 7.47-7.41 (m, 2H), 7.21 (t, 1H, *J* = 7.9 Hz), 6.99 (d, 1H, *J* = 8.7 Hz), 5.80 (s, 1H), 3.77-3.72 (m, 1H), 3.58-3.53 (m, 1H), 1.51-1.43 (m, 1H), 1.29-1.14 (m, 9H), 0.87-0.75 (m, 5H); <sup>13</sup>C NMR (CDCl<sub>3</sub>, 100 MHz): δ 182.2, 160.6, 155.0, 148.3, 140.7, 135.1, 132.9, 127.6, 127.0, 126.1, 125.9, 124.6, 123.3, 119.9, 108.0, 100.4, 100.4, 71.4, 71.2, 39.4, 39.3, 30.4, 30.3, 29.0, 28.7, 23.7, 23.6, 23.0, 14.0, 14.0, 11.1, 10.8; IR: ν<sub>max</sub>, 3446, 2926, 1642, 1610, 1526, 1469, 1421, 1259, 1067, 607 cm<sup>-1</sup>; ESI-MS: M-Octyloxy (M-129), 375. ESI-HRMS: Calcd. for C<sub>17</sub> H<sub>9</sub> O<sub>2</sub> N<sub>2</sub> Cl<sub>2</sub> S = 374.9756. Found: 374.9756.

(Z)-3-((4-chlorobenzo[d]thiazol-2-ylamino)methylene)-2-isobutoxychroman-4-one (**3ba**):

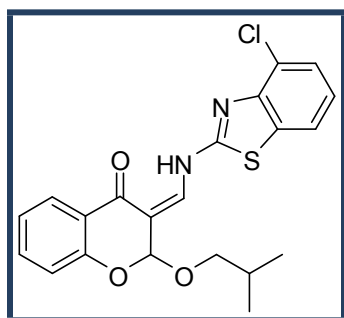

Color & State: Greenish yellow solid. M.P.: 149-151 °C. <sup>1</sup>H NMR (CDCl<sub>3</sub>, 500 MHz): δ 12.36 (d, 1H, *J* = 10.8 Hz), 8.02 (d, 1H, *J* = 10.8 Hz), 7.97 (dd, 1H, *J*<sub>1</sub> = 7.8 Hz, *J*<sub>2</sub> = 1.7 Hz), 7.62 (dd, 1H, *J*<sub>1</sub> = 8.1 Hz, *J*<sub>2</sub> = 0.9 Hz), 7.53-7.48 (m, 1H), 7.44 (dd, 1H, *J*<sub>1</sub> = 7.9 Hz, *J*<sub>2</sub> = 0.9 Hz), 7.20 (t, 1H, *J* = 7.9 Hz), 7.12 (t, 1H, *J* = 7.9 Hz), 7.03 (d, 1H, *J* = 7.9 Hz), 5.82 (s, 1H), 3.65-3.60 (m, 1H), 3.48-3.44 (m, 1H), 1.84 (nonet, 1H, *J* = 6.7 Hz), 0.86 (d, 3H, *J* = 6.7 Hz), 0.80 (d, 3H, *J* = 6.6 Hz); <sup>13</sup>C NMR (CDCl<sub>3</sub>, 100 MHz): δ 183.4, 160.8, 156.6, 148.3, 140.2, 135.4, 132.9, 126.9, 126.6, 125.8, 124.4, 122.3, 122.1, 119.8, 118.3, 108.5, 100.1, 75.2, 28.3, 19.3, 19.2; IR: ν<sub>max</sub>, 3423 (N-H, stretch), 3087 (=C-C-H, stretch), 2955 (C-H, stretch, Alkyl), 2900 (C-H, stretch, Alkyl), 2871 (C-H, stretch, Alkyl), 1641, 1607, 1523, 1467, 1420, 1275, 1256, 1203, 1063, 969 cm<sup>-1</sup>; ESI-MS: M-73 (M-Isobutoxy), 341.

(Z)-6-chloro-3-((4-chlorobenzo[d]thiazol-2-ylamino)methylene)-2-isobutoxychroman-4-one (**3bb**): Color

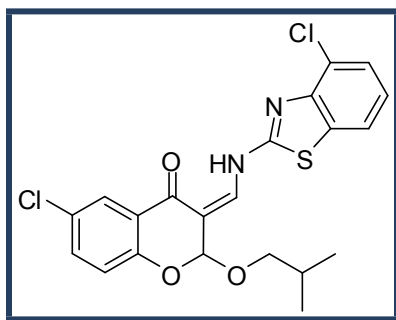

& State: Pale yellow solid. M.P.: 146-148 °C. <sup>1</sup>H NMR (CDCl<sub>3</sub>, 500 MHz): δ 12.27 (d, 1H, *J* = 10.8 Hz), 8.04 (d, 1H, *J* = 11.0 Hz), 7.92 (d, 1H, *J* = 2.6 Hz), 7.63 (dd, 1H, *J*<sub>1</sub> = 7.9 Hz, *J*<sub>2</sub> = 0.9 Hz), 7.46-7.42 (m, 2H), 7.21 (t, 1H, *J* = 7.9 Hz), 6.99 (d, 1H, *J* = 8.7 Hz), 5.81 (s, 1H), 3.62-3.58 (m, 1H), 3.47-3.43 (m, 1H), 1.83 (nonet, 1H, *J* = 6.7 HZ), 0.86 (d, 3H, *J* = 6.7 Hz), 0.80 (d, 3H, *J* = 6.7 Hz); <sup>13</sup>C NMR (CDCl<sub>3</sub>, 100 MHz): δ 182.0, 160.6, 154.9, 148.2, 140.7, 135.0, 132.9, 127.5, 126.9, 126.0, 125.9, 124.5, 123.2, 119.9, 119.8, 107.9, 100.3, 75.3, 28.3, 19.2; IR: ν<sub>max</sub>, 3451, 2956, 2907, 2872, 1650, 1610, 1522,

1469, 131, 1220, 1067, 1018, 967, 945 cm<sup>-1</sup>; ESI: M<sup>1+</sup>. ESI-HRMS: Calcd. for. C<sub>17</sub>H<sub>9</sub>Cl<sub>2</sub>N<sub>2</sub>O<sub>2</sub>S: 374.97618. Found: 374.97638.

(Z)-3-((benzo[d]thiazol-2-ylamino)methylene)-6-chloro-2-(2-hydroxyethoxy)chroman-4-one (**3bc**): Color

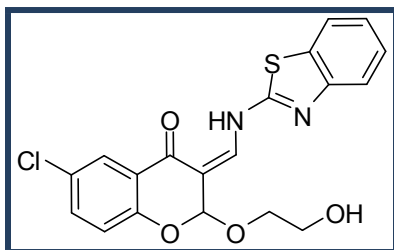

& State: Yellow solid. M.P.: 116-118 °C. <sup>1</sup>H NMR (CDCl<sub>3</sub>, 500 MHz): δ 12.22 (d, 1H, *J* = 11.0 Hz), 8.05 (d, 1H, *J* = 11.0 Hz), 7.91 (d, 1H, *J* = 2.6 Hz), 7.78-7.72 (m, 2H), 7.45-7.41 (m, 2H), 7.30 (t, 1H, *J* = 8.1 Hz), 6.99 (d, 1H, *J* = 8.7 Hz), 5.88 (s, 1H), 3.97-3.92 (m, 1H), 3.86-3.81 (m, 1H), 3.76-3.72 (m, 2H); <sup>13</sup>C NMR (DMSO-d<sub>6</sub>, 75 MHz): δ 188.0, 173.8, 166.4, 163.7, 154.1, 152.7, 134.9, 131.1, 130.8, 126.4, 125.9, 125.3, 124.2, 121.3, 120.8, 119.9, 117.7, 62.7; IR: ν<sub>max</sub>,

3425(br), 2925, 1651, 1607, 1521, 1468, 1441, 1260, 1205, 1123, 1031, 963, 753, 723 cm<sup>-1</sup>. ESI-MS: M-[(2-Hydroxyethyl)oxy], i.e., M-61, 341.

(Z)-6-chloro-3-((4-chlorobenzo[d]thiazol-2-ylamino)methylene)-2-(5-hydroxypentyl)oxychroman-4-one

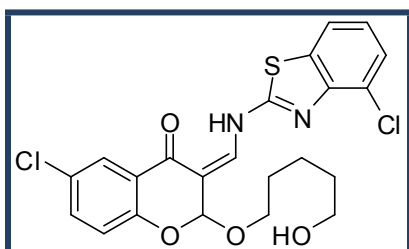

(**3bd**): Color & State: Yellow solid. M.P.: 140-142 °C. <sup>1</sup>H NMR (DMSO-d<sub>6</sub>, 300 MHz): δ 10.08 (s, 1H), 8.93 (s, 1H), 8.05 (d, 1H, *J* = 2.6 Hz), 7.91 (dd, 1H, *J*<sub>1</sub> = 8.9 Hz, *J*<sub>2</sub> = 2.6 Hz), 7.84-7.78 (m, 3H), 7.60 (d, 1H, *J* = 7.7 Hz), 7.26 (d, 1H, *J* = 7.7 Hz), 6.98 (t, 1H, *J* = 7.7 Hz), 4.44-4.32 (m, 2H), 3.36 (t, 2H, *J* = 6.2 Hz), 1.46-1.34 (m, 4H), 1.33-1.22 (m, 2H); <sup>13</sup>C NMR (DMSO-d<sub>6</sub>, 75 MHz): δ 188.0, 173.8, 167.3, 163.8, 154.2, 149.4, 134.9, 132.1, 131.2, 125.9, 125.5,

124.2, 121.5, 121.4, 121.3, 119.9, 119.8, 60.7, 32.4, 22.0; IR: ν<sub>max</sub>, 3430, 2934, 2864, 1644, 1607, 1468, 1422, 1257, 1205, 1073, 950, 823, 774 cm<sup>-1</sup>. ESI-MS: M-[(5-hydroxypentyl)oxy], i.e., M-103, 375. ESI-HRMS: Calcd., for C<sub>17</sub>H<sub>9</sub>Cl<sub>2</sub>N<sub>2</sub>O<sub>2</sub>S: 374.9762. Found: 374.9752.

3-(sec-butoxy(4-chlorobenzo[d]thiazol-2-ylamino)methyl)-6-chloro-4H-chromen-4-one (**3be**): Color & State: Greenish yellow solid. M.P.: 257-259 °C. <sup>1</sup>H NMR (DMSO-d<sub>6</sub>, 300 MHz): δ 10.09 (s, 1H), 8.92 (s, 1H), 8.04 (d, 1H, *J* = 2.6 Hz), 7.90 (dd, 1H, *J*<sub>1</sub> = 8.9 Hz, *J*<sub>2</sub> = 2.6 Hz), 7.83-7.77 (m, 1H), 7.60 (dd, 1H, *J*<sub>1</sub> = 7.9 Hz, *J*<sub>2</sub> = 0.9 Hz), 7.26 (dd, 1H, *J*<sub>1</sub> = 7.9 Hz, *J*<sub>2</sub> = 0.9 Hz), 6.97 (t, 1H, *J* = 7.9 Hz), 4.31 (d, 1H, *J* =

3.6 Hz), 3.53-3.44 (m, 1H), 1.39-1.24 (m, 2H), 1.01 (d, 3H,  $J = 6.0$  Hz), 0.81 (t, 3H,  $J = 7.4$  Hz);  $^{13}\text{C}$

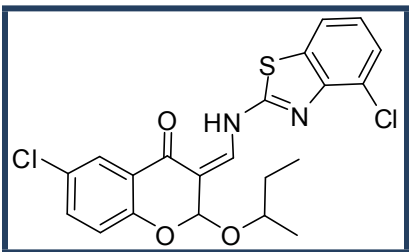

NMR (DMSO- $d_6$ , 75 MHz):  $\delta$  188.0, 173.8, 167.3, 163.7, 154.1, 149.4, 134.9, 132.1, 131.1, 125.8, 125.5, 124.2, 121.4, 121.3, 121.2, 119.9, 119.7, 67.1, 31.6, 23.0, 10.0; IR:  $\nu_{\text{max}}$ , 3435 (br), 2964, 2925, 2854, 1649, 1607, 1524, 1420, 1384, 1260, 1202, 1059, 960, 718  $\text{cm}^{-1}$ . ESI-MS: M-73 (M-(2-Butoxy)), 375. ESI-HRMS: Calcd. for  $\text{C}_{17}\text{H}_9\text{O}_2\text{N}_2\text{Cl}_2\text{S} = 374.9756$ . Found: 374.9764.

(Z)-2-sec-butoxy-3-((4-chlorobenzodithiazol-2-ylamino)methylene)chroman-4-one (**3bf**): Color & State:

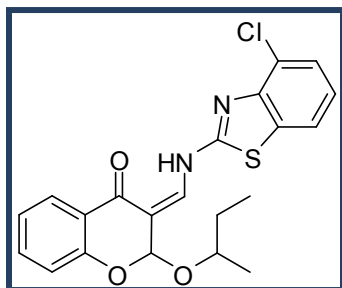

Yellow solid. M.P.: 140-142  $^{\circ}\text{C}$ .  $^1\text{H}$  NMR (DMSO- $d_6$ , 300 MHz):  $\delta$  10.11 (s, 1H), 8.89 (s, 1H), 8.13 (dd, 1H,  $J_1 = 7.9$  Hz,  $J_2 = 1.5$  Hz), 7.90-7.81 (m, 2H), 7.73 (d, 1H,  $J = 8.1$  Hz), 7.63-7.53 (m, 2H), 7.26 (dd, 1H,  $J_1 = 7.9$  Hz,  $J_2 = 0.9$  Hz), 6.97 (t, 1H,  $J = 7.9$  Hz), 4.35 (d, 1H,  $J = 4.5$  Hz), 3.55-3.47 (m, 1H), 1.37-1.24 (m, 2H), 1.01 (d, 3H,  $J = 6.4$  Hz), 0.81 (t, 3H,  $J = 7.4$  Hz);  $^{13}\text{C}$  NMR (DMSO- $d_6$ , 75 MHz):  $\delta$  188.3, 174.9, 167.3, 163.4, 155.6, 149.4, 135.1, 132.1, 126.7, 125.5, 125.2, 124.6, 121.4, 121.2, 119.9, 119.7, 118.8, 67.1, 31.6, 23.0, 10.0; IR:  $\nu_{\text{max}}$ , 3420, 3072, 2970, 2925, 1646, 1610,

1525, 140, 1369, 1272, 1061, 1016, 947  $\text{cm}^{-1}$ .

(Z)-6-chloro-3-((4-chlorobenzodithiazol-2-ylamino)methylene)-2-(cyclohexyloxy)chroman-4-one (**3ag**):

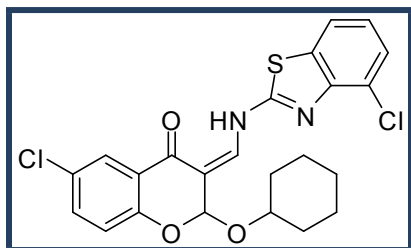

Color & State: Lemon yellow solid. M.P.: 260-262  $^{\circ}\text{C}$ .  $^1\text{H}$  NMR (CDCl $_3$ , 500 MHz):  $\delta$  12.28 (d, 1H,  $J = 10.8$  Hz), 7.99 (d, 1H,  $J = 11.0$  Hz), 7.91 (d, 1H,  $J = 2.6$  Hz), 7.62 (dd, 1H,  $J_1 = 8.1$  Hz,  $J_2 = 0.9$  Hz), 7.47-7.41 (m, 2H), 7.20 (t, 1H,  $J = 7.9$  Hz), 6.96 (d, 1H,  $J = 8.85$  Hz), 5.97 (s, 1H), 3.88-3.81 (m, 1H), 2.05-1.98 (m, 1H), 1.83-1.73 (m, 1H), 1.71-1.64 (m, 1H), 1.57-1.50 (m, 1H), 1.42-1.23 (m, 5H), 1.22-1.13 (m, 1H);  $^{13}\text{C}$  NMR (CDCl $_3$ , 100 MHz):  $\delta$  182.2,

160.7, 155.2, 148.2, 140.6, 135.1, 132.9, 127.5, 127.0, 126.1, 125.9, 124.5, 123.2, 119.9, 119.9, 108.3, 98.6, 76.9, 33.2, 32.0, 25.4, 24.1, 24.1; IR:  $\nu_{\text{max}}$ , 3432, 3083, 2930, 2853, 1637, 1607, 1525, 1467, 1420, 1255, 1204, 1059, 958  $\text{cm}^{-1}$ . ESI-MS: M-99 (M-Cyclohexyloxy), 375. ESI-HRMS: Calcd. for  $\text{C}_{17}\text{H}_9\text{O}_2\text{N}_2\text{Cl}_2\text{S} = 374.9756$ . Found : 374.9750.

(Z)-6-chloro-3-((4-chlorophenylamino)methylene)-2-methoxychroman-4-one (**3bh**): Color & State:

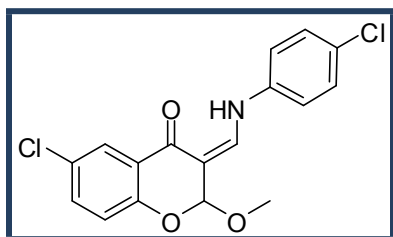

Yellow solid. M.P.: 111-113  $^{\circ}\text{C}$ .  $^1\text{H}$  NMR (CDCl $_3$ , 500 MHz):  $\delta$  12.07 (d, 1H,  $J = 12.2$  Hz), 7.90 (d, 1H,  $J = 2.6$  Hz), 7.44 (d, 1H,  $J = 12.4$  Hz), 7.39 (dd, 1H,  $J_1 = 8.7$  Hz,  $J_2 = 2.6$  Hz), 7.31 (d, 2H,  $J = 8.7$  Hz), 7.05 (d, 2H,  $J = 8.8$  Hz), 6.98 (d, 1H,  $J = 8.7$  Hz), 5.66 (s, 1H), 3.50 (s, 3H);  $^{13}\text{C}$  NMR (CDCl $_3$ , 100 MHz):  $\delta$  180.0, 154.0, 144.2, 138.0, 134.1, 129.8, 127.5, 125.8, 123.7, 119.4, 117.9, 103.4, 101.6, 55.5; ESI-MS: M-1, 348. ESI-

HRMS: calcd for.  $\text{C}_{17}\text{H}_{12}\text{O}_3\text{NCl}_2$ : 348.0188. found: 348.0199.

(Z)-6-chloro-3-((6-methoxybenzo[d]thiazol-2-ylamino)methylene)-2-(octyloxy)chroman-4-one (**3bi**):

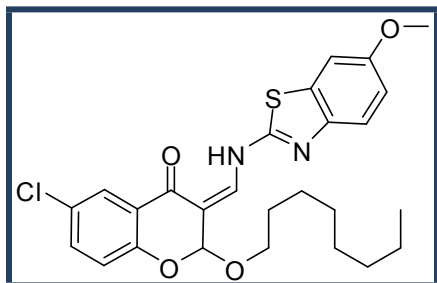

Color & State: Lemon yellow solid. M.P.: 127-129 °C and 210 °C. <sup>1</sup>H NMR (CDCl<sub>3</sub>, 500 MHz): δ 12.18 (d, 1H, *J* = 11.1 Hz), 7.94 (d, 1H, *J* = 11.0 Hz), 7.91 (d, 1H, *J* = 2.6 Hz), 7.66 (d, 1H, *J* = 8.8 Hz), 7.42 (dd, 1H, *J*<sub>1</sub> = 8.7 Hz, *J*<sub>2</sub> = 2.6 Hz), 7.23 (d, 1H, *J* = 2.6 Hz), 7.02 (dd, 1H, *J*<sub>1</sub> = 8.8 Hz, *J*<sub>2</sub> = 2.4 Hz), 6.98 (d, 1H, *J* = 8.7 Hz), 5.76 (s, 1H), 3.90-3.81 (s, 3H), 3.76-3.71 (m, 1H), 3.56-3.51 (m, 1H), 1.31-1.13 (m, 9H), 0.86-0.76 (m, 6H); <sup>13</sup>C NMR (CDCl<sub>3</sub>, 125 MHz): δ 181.8, 157.9, 156.9, 154.9, 145.3, 141.2, 134.8, 133.0, 127.5, 126.0, 123.4, 121.7, 119.8, 115.1, 107.1, 104.9, 100.5, 100.5, 71.3, 71.1, 55.8, 39.4, 39.3, 30.4, 30.3, 29.0, 28.7, 23.7, 23.6, 23.0, 14.0, 11.1, 10.8; IR: ν<sub>max</sub>, 3434, 2958, 2926, 2957, 1649, 1605, 1536, 1466, 1420, 125, 1202, 1065, 958, 827 cm<sup>-1</sup>. ESI-MS: M-129 (M-Octyl), 371, ESI-HRMS: Calcd. for C<sub>18</sub>H<sub>12</sub>O<sub>3</sub>N<sub>2</sub>ClS = 371.0252. Found: 371.0259.

(Z)-6-chloro-3-((4-chlorobenzo[d]thiazol-2-ylamino)methylene)-2-((E)-3,7-dimethylocta-2,6-

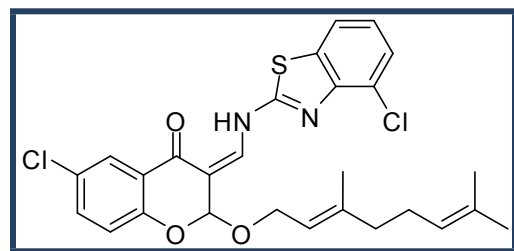

dienyloxy)chroman-4-one (**3bj**): Color & State: Yellow solid. M.P.: 121-123 °C. <sup>1</sup>H NMR (CDCl<sub>3</sub>, 400 MHz): δ 12.29 (d, 1H, *J* = 10.9 Hz), 8.02 (d, 1H, *J* = 10.8 Hz), 7.91 (s, 1H), 7.62 (d, 1H, *J* = 7.8 Hz), 7.47-7.41 (m, 2H), 7.20 (t, 1H, *J* = 7.9 Hz), 7.01 (d, 1H, *J* = 8.7 Hz), 5.88 (s, 1H), 5.33 (t, 1H, *J* = 6.4 Hz), 5.08 (t, 1H, *J* = 6.2 Hz), 4.28 (d, 2H, *J* = 6.7 Hz), 2.15-2.01 (m, 4H), 1.73-1.65 (m, 6H), 1.59 (s, 3H); <sup>13</sup>C NMR (CDCl<sub>3</sub>, 100 MHz): δ 182.0, 160.6, 154.9, 148.2, 142.3, 141.1, 135.1, 132.9, 131.8, 127.7, 127.0, 126.2, 125.9, 124.6, 123.7, 123.3, 119.9, 119.0, 107.8, 98.9, 64.6, 39.6, 26.2, 25.7, 17.7, 16.5; ESI-MS: M-Geranyloxy (M-153), 375. ESI-HRMS: Calcd. for C<sub>17</sub>H<sub>9</sub>Cl<sub>2</sub>N<sub>2</sub>O<sub>2</sub>S: 374.9762. Found: 374.9761.

Name: (E)-3-((6-chlorobenzo[d]thiazol-2-ylamino)methylene)-2-(hex-5-ynyloxy)chroman-4-one (**3bk**):

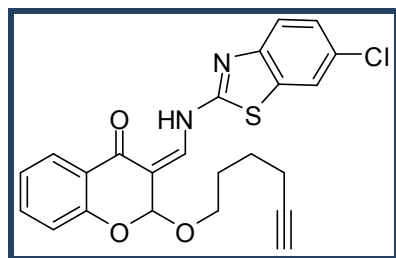

Color & State: Yellow color solid. M.P.: 132-134 °C. <sup>1</sup>H NMR (CDCl<sub>3</sub>, 300 MHz): δ 12.30 (d, 1H, *J* = 10.9 Hz), 8.01 – 7.91 (m, 2H), 7.70 (d, 1H, *J* = 2.0 Hz), 7.66 (d, 1H, *J* = 8.7 Hz), 7.55 – 7.47 (m, 1H), 7.38 (dd, 1H, *J*<sub>1</sub> = 8.7 Hz, *J*<sub>2</sub> = 2.0 Hz), 7.12 (t, 1H, *J* = 7.2 Hz), 7.03 (d, 1H, *J* = 8.2 Hz), 5.80 (s, 1H), 3.79 (m, 2H), 2.14 (td, 1H, *J*<sub>1</sub> = 7.1 Hz, *J*<sub>2</sub> = 2.6 Hz), 1.93 (t, 1H, *J* = 2.6 Hz), 1.76 – 1.63 (m, 2H), 1.49 (m, 2H); <sup>13</sup>C NMR (CDCl<sub>3</sub>, 100 MHz): δ 183.2, 160.5, 156.5, 149.8, 140.3, 135.5, 132.9, 129.5, 127.3, 126.7, 122.3, 121.8, 121.0, 118.2, 108.2, 100.1, 84.1, 68.5, 67.9, 28.4, 24.9, 18.0; ESI-MS: M-(5-hexynyl-1-oxy) = 341.

3-((benzo[d]thiazol-2-ylimino)methyl)-4H-chromen-4-one (**4a**). Color & State: Pale yellow solid. M.P.:

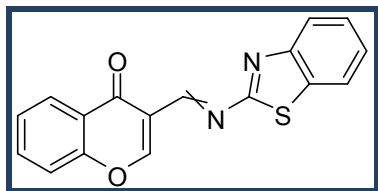

264-266 °C.  $^1\text{H}$  NMR ( $\text{CDCl}_3$ , 400 MHz):  $\delta$  8.98 (s, 1H), 8.35-8.30 (m, 2H), 7.82 (t, 1H,  $J = 8.7$  Hz), 7.71 (d, 1H,  $J = 7.3$  Hz), 7.65 (d, 1H,  $J = 8.2$  Hz), 7.54 (t, 1H,  $J = 8.1$  Hz), 7.42-7.33 (m, 2H), 7.09 (d, 1H,  $J = 7.5$  Hz);  $^{13}\text{C}$  NMR ( $\text{CDCl}_3$ , 100 MHz):  $\delta$  172.0, 171.8, 168.6, 156.8, 156.4, 136.5, 134.8, 127.4, 126.5, 126.3, 126.0, 124.8, 124.6, 123.0, 122.4, 118.6, 112.3; IR:  $\nu_{\text{max}}$ , 3443, 3063, 2884, 1651, 1628, 1610, 1465, 1453, 1364, 1190, 1067, 766  $\text{cm}^{-1}$ .

3-((6-methylbenzo[d]thiazol-2-ylimino)methyl)-4H-chromen-4-one (**4b**): Color & State : Wheat Brown

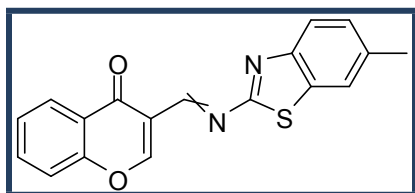

Solid. M.P.: 254-256 °C.  $^1\text{H}$  NMR ( $\text{CDCl}_3$ , 500 MHz):  $\delta$  8.96 (s, 1H), 8.30-8.34 (m, 2H), 7.74-7.79 (m, 1H), 7.64 (d, 1H,  $J = 8.4$  Hz), 7.56-7.49 (m, 2H), 7.19 (d, 1H,  $J = 8.2$  Hz), 6.98 (d, 1H,  $J = 8.2$  Hz), 2.45 (s, 3H);  $^1\text{H}$  NMR ( $\text{DMSO-d}_6$ , 300 MHz):  $\delta$  9.06 (s, 1H), 8.81 (s, 1H), 8.14

(dd, 1H,  $J_1 = 7.9$  Hz,  $J_2 = 1.3$  Hz), 8.0-7.92 (m, 1H), 7.86 (d, 1H,  $J = 7.9$  Hz), 7.70 (s, 1H), 7.63 (s, 1H,  $J = 7.9$  Hz), 7.34 (s, 1H,  $J = 8.3$  Hz), 7.26 (d, 1H,  $J = 8.3$  Hz), 2.41 (s, 3H);  $^{13}\text{C}$  NMR ( $\text{DMSO-d}_6$ , 125 MHz):  $\delta$  171.8, 167.6, 158.5, 156.1, 134.7, 134.5, 128.7, 128.6, 127.7, 126.4, 125.4, 124.8, 123.9, 123.0, 122.9, 121.9, 20.7; IR:  $\nu_{\text{max}}$ , 3418, 3068, 2926, 1657, 1609, 1452, 1346, 1191, 1065, 758  $\text{cm}^{-1}$ .

3-((benzo[d]thiazol-2-ylimino)methyl)-6-chloro-4H-chromen-4-one (**4c**). Color & State: Greenish Yellow

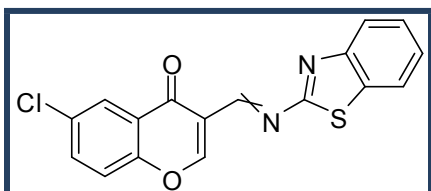

Solid. M.P.: 228-230 °C.  $^1\text{H}$  NMR ( $\text{DMSO-d}_6$ , 400 MHz):  $\delta$  9.13 (s, 1H), 8.84 (s, 1H), 8.09 (d, 1H,  $J = 2.6$  Hz), 8.03 (dd, 1H,  $J_1 = 8.9$  Hz,  $J_2 = 2.7$  Hz), 8.00-7.93 (m, 2H), 7.51-7.38 (m, 3H);  $^{13}\text{C}$  NMR ( $\text{DMSO-d}_6$ , 100 MHz):  $\delta$  171.4, 170.8, 167.6, 158.9, 154.6, 136.5, 135.0, 130.8, 127.5, 125.0, 124.7, 124.2, 123.2, 121.8, 121.4,

113.1; IR:  $\nu_{\text{max}}$ , 3423, 3069, 1657, 1627, 1467, 1452, 1385, 1301, 1185, 1066, 752  $\text{cm}^{-1}$ ;

3-((benzo[d]thiazol-2-ylimino)methyl)-6-bromo-4H-chromen-4-one (**4d**). Color & State: Wheat Brown

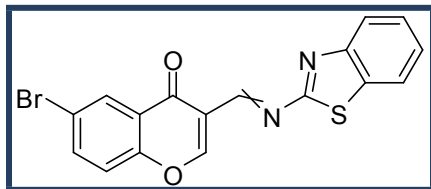

solid. M.P.: 260-262 °C.  $^1\text{H}$  NMR ( $\text{DMSO-d}_6$ , 300 MHz):  $\delta$  8.46 (s, 1H), 8.25-6.90 (m, 8H) (the solubility is very less even to get a reasonably good  $^1\text{H}$  NMR); IR:  $\nu_{\text{max}}$ , 3132, 1602, 1514, 1437, 1382, 1202, 1103, 742  $\text{cm}^{-1}$ .



3-((benzo[d]thiazol-2-ylimino)methyl)-6-hydroxy-4H-chromen-4-one (**4e**): Color & State: Pale yellow

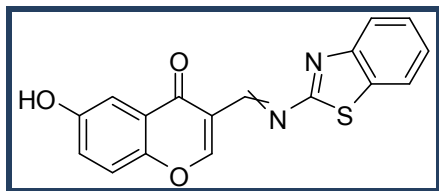

$\nu_{\max}$ , 3423, 3059, 1642, 1449, 1315, 1193, 1066, 751  $\text{cm}^{-1}$ .

solid. M.P.: 267-269 °C.  $^1\text{H}$  NMR (DMSO- $d_6$ , 500 MHz):  $\delta$  10.27 (s, 1H), 9.01 (s, 1H), 8.83 (s, 1H), 7.98 (d, 1H,  $J = 7.9$  Hz), 7.74 (dd, 1H,  $J_1 = 8.4$  Hz,  $J_2 = 0.9$  Hz), 7.47-7.35 (m, 5H).  $^{13}\text{C}$  NMR (DMSO- $d_6$ , 125 MHz):  $\delta$  171.4, 167.7, 158.0, 155.5, 149.7, 136.7, 127.5, 124.8, 124.7, 124.6, 123.9, 123.2, 120.7, 120.3, 113.0, 107.7. IR:

6-chloro-3-((6-methoxybenzo[d]thiazol-2-ylimino)methyl)-4H-chromen-4-one (**4f**): Color & State: Off-

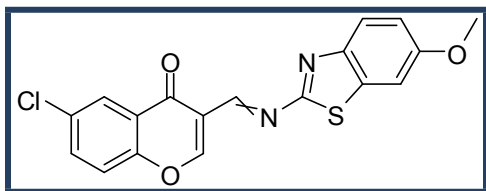

white solid. M.P.: 262-264 °C.  $^1\text{H}$  NMR (DMSO- $d_6$ , 500 MHz):  $\delta$  9.10 (s, 1H), 8.79 (s, 1H), 8.08 (d, 1H,  $J = 2.4$  Hz), 8.01 (dd, 1H,  $J_1 = 9.0$  Hz,  $J_2 = 2.4$  Hz), 7.94 (d, 1H,  $J = 9.0$  Hz), 7.62 (d, 1H,  $J = 2.3$  Hz), 7.41 (d, 1H,  $J = 9.0$  Hz), 7.03 (dd, 1H,  $J_1 = 9.0$  Hz,  $J_2 = 2.3$  Hz), 3.82 (s, 3H);  $^1\text{H}$  NMR ( $\text{CDCl}_3$ , 500 MHz):  $\delta$  8.93 (s, 1H), 8.31 (s, 1H), 8.27 (d, 1H,  $J = 2.4$  Hz), 7.76 (dd, 1H,  $J_1 = 9.0$  Hz,  $J_2 = 2.6$  Hz), 7.60 (d, 1H,  $J = 9.0$  Hz), 7.21 (s, 1H), 6.96 (s, 2H), 3.87 (s, 3H);  $^{13}\text{C}$  NMR (DMSO- $d_6$ , 125 MHz):  $\delta$  171.1, 170.8, 167.2, 158.8, 156.9, 154.6, 135.0, 130.8, 130.4, 126.1, 125.1, 124.2, 121.9, 121.5, 115.2, 114.0, 107.1, 55.9; IR:  $\nu_{\max}$ , 3458, 3068, 2925, 1663, 1609, 1469, 1456, 1244, 1184, 1060, 84, 791  $\text{cm}^{-1}$ .

3-((6-methoxybenzo[d]thiazol-2-ylimino)methyl)-4H-chromen-4-one (**4g**): Color & State: White solid.

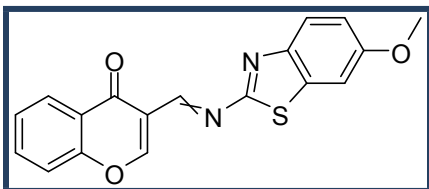

M.P.: 281-283 °C.  $^1\text{H}$  NMR ( $\text{CDCl}_3$ , 500 MHz):  $\delta$  8.94 (s, 1H), 8.34-8.30 (m, 2H), 7.82 (t,  $J = 7.48$  Hz), 7.64 (d, 1H,  $J = 8.55$  Hz), 7.54 (t, 1H,  $J = 7.48$  Hz), 7.21 (s, 1H), 7.02-6.93 (m, 2H), 3.86 (s, 3H);  $^{13}\text{C}$  NMR ( $\text{CDCl}_3$ , 500 MHz):  $\delta$  172.0, 171.6, 168.2, 157.4, 156.8, 156.3, 134.7, 130.4, 127.2, 126.5, 126.3, 124.6, 122.5, 118.5, 115.3, 113.1, 106.7, 56.0; IR:  $\nu_{\max}$ , 3068, 2923, 165, 1604, 1488, 1467, 1245, 1189, 1033, 756  $\text{cm}^{-1}$ .

M.P.: 281-283 °C.  $^1\text{H}$  NMR ( $\text{CDCl}_3$ , 500 MHz):  $\delta$  8.94 (s, 1H), 8.34-8.30 (m, 2H), 7.82 (t,  $J = 7.48$  Hz), 7.64 (d, 1H,  $J = 8.55$  Hz), 7.54 (t, 1H,  $J = 7.48$  Hz), 7.21 (s, 1H), 7.02-6.93 (m, 2H), 3.86 (s, 3H);  $^{13}\text{C}$  NMR ( $\text{CDCl}_3$ , 500 MHz):  $\delta$  172.0, 171.6, 168.2, 157.4, 156.8, 156.3, 134.7, 130.4, 127.2, 126.5, 126.3, 124.6, 122.5, 118.5, 115.3,

6-chloro-3-(dimethoxymethyl)-4H-chromen-4-one (**5a**). Color & State: Wheat brown solid. M.P.: 114-

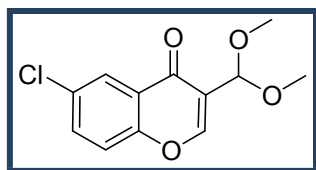

116 °C. <sup>1</sup>H NMR (CDCl<sub>3</sub>, 500 MHz): δ 8.19 (d, 1H, *J* = 2.6 Hz), 8.11 (s, 1H), 7.62 (dd, 1H, *J*<sub>1</sub> = 8.8 Hz, *J*<sub>2</sub> = 2.6 Hz), 7.43 (d, 1H, *J* = 8.8 Hz), 5.59 (s, 1H), 3.44 (s, 6H); <sup>13</sup>C NMR (CDCl<sub>3</sub>, 100 MHz): δ 174.9, 154.9, 154.5, 133.9, 131.2, 125.2, 125.1, 121.3, 119.8, 98.0, 54.1; IR: ν<sub>max</sub>, 3091, 3068, 2931, 1649, 1463, 1311, 1098, 1060 cm<sup>-1</sup>. ESI-MS: M+1, 255. ESI-HRMS: Calcd. for C<sub>12</sub> H<sub>12</sub> O<sub>4</sub> Cl = 255.0419. Found: 255.0414.

3-(dipropoxymethyl)-4H-chromen-4-one (**5b**). Color & State: Pale brown solid. M.P.: 107-109 °C. <sup>1</sup>H

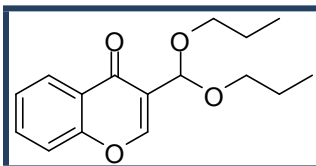

NMR (CDCl<sub>3</sub>, 400 MHz): δ 8.24 (dd, 1H, *J*<sub>1</sub> = 7.9 Hz, *J*<sub>2</sub> = 1.6 Hz), 8.17 (d, 1H, *J* = 0.7 Hz), 7.69-7.64 (m, 1H), 7.46 (d, 1H, *J* = 8.4 Hz), 7.41 (t, 1H, *J* = 8.1 Hz), 5.72 (d, 1H, *J* = 0.7 Hz), 3.69-3.62 (m, 2H), 3.57-3.50 (m, 2H), 1.65 (sextet, 4H, *J* = 7.3 Hz), 0.95 (t, 6H, *J* = 7.5 Hz); <sup>13</sup>C NMR (CDCl<sub>3</sub>, 100 MHz): δ 176.2, 156.3, 154.7, 133.6, 125.9, 125.1, 124.3, 122.3, 118.1, 96.5, 69.1, 23.0;

4-chloroquinoline-3-carbaldehyde (**Q1**).

**Q1**

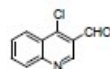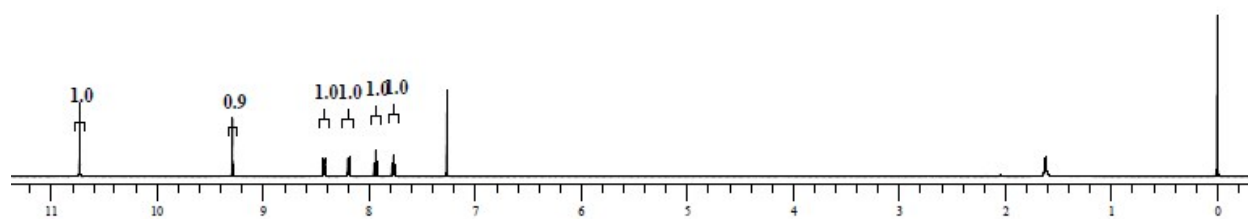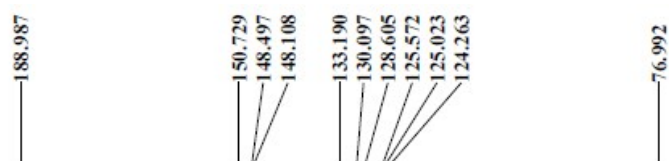

**Q1**

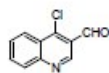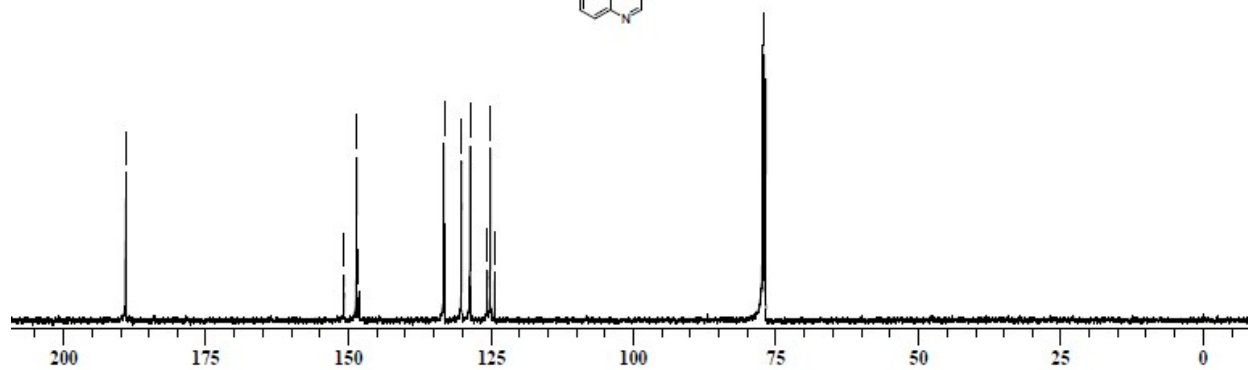

1,4-dihydro-4-oxoquinoline-3-carbaldehyde (Q2).

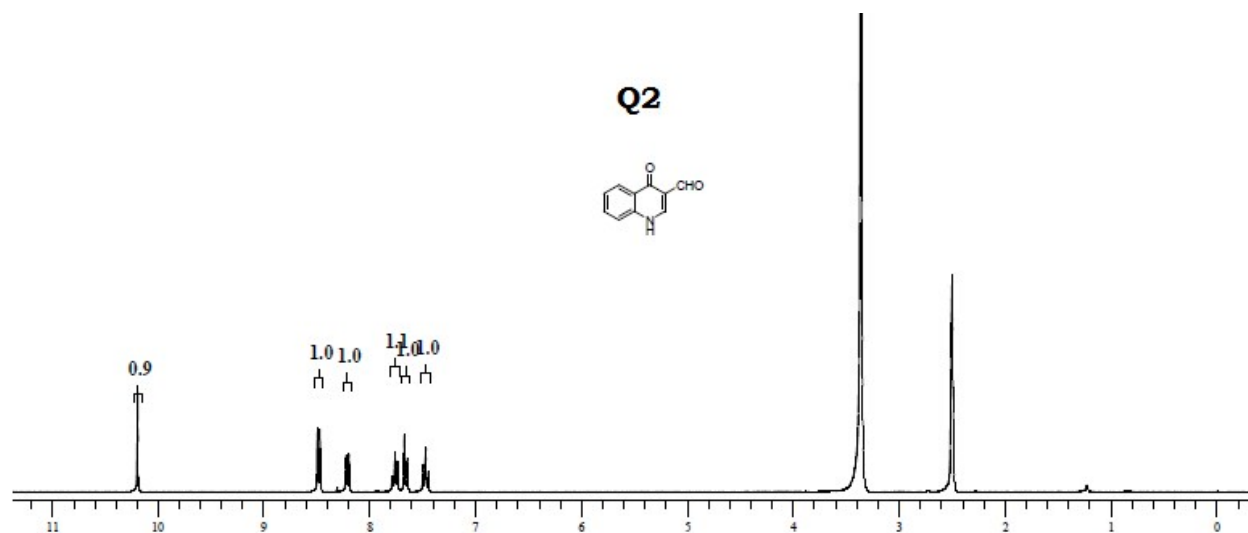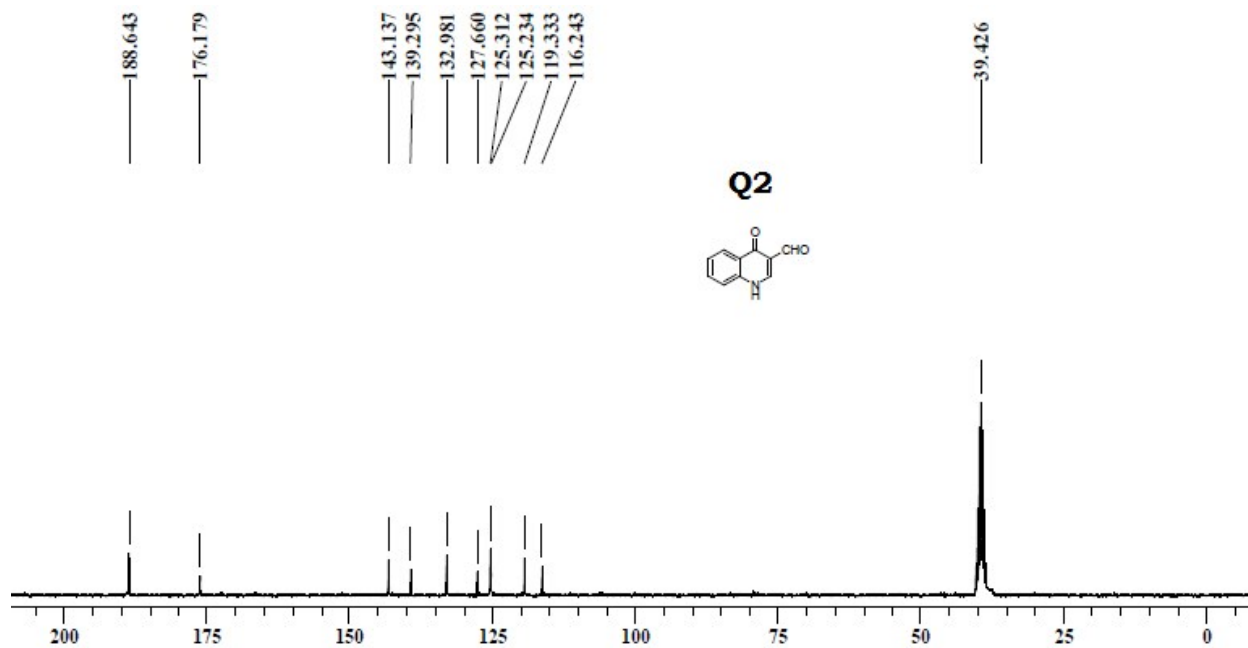

ethyl 3-formyl-4-oxoquinoline-1(4H)-carboxylate (Q4):

**Q4**

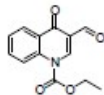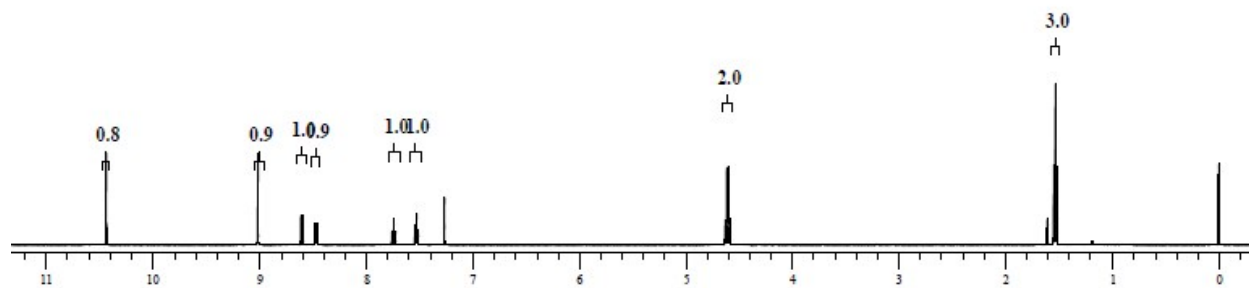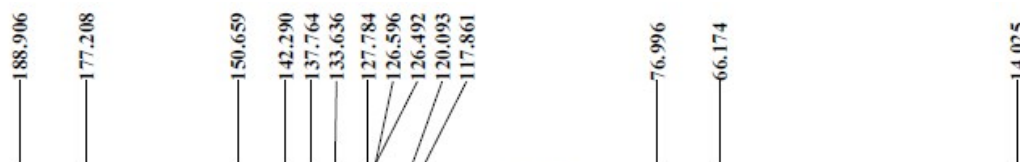

**Q4**

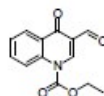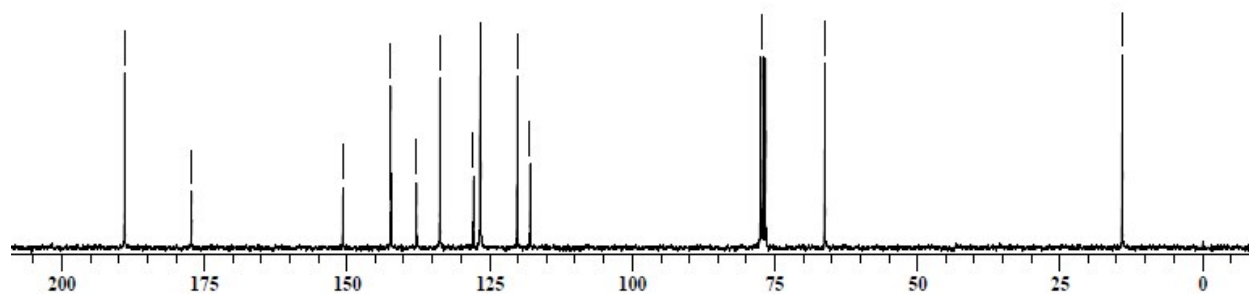

1,4-dihydro-4-oxo-1-tosylquinoline-3-carbaldehyde (Q5):

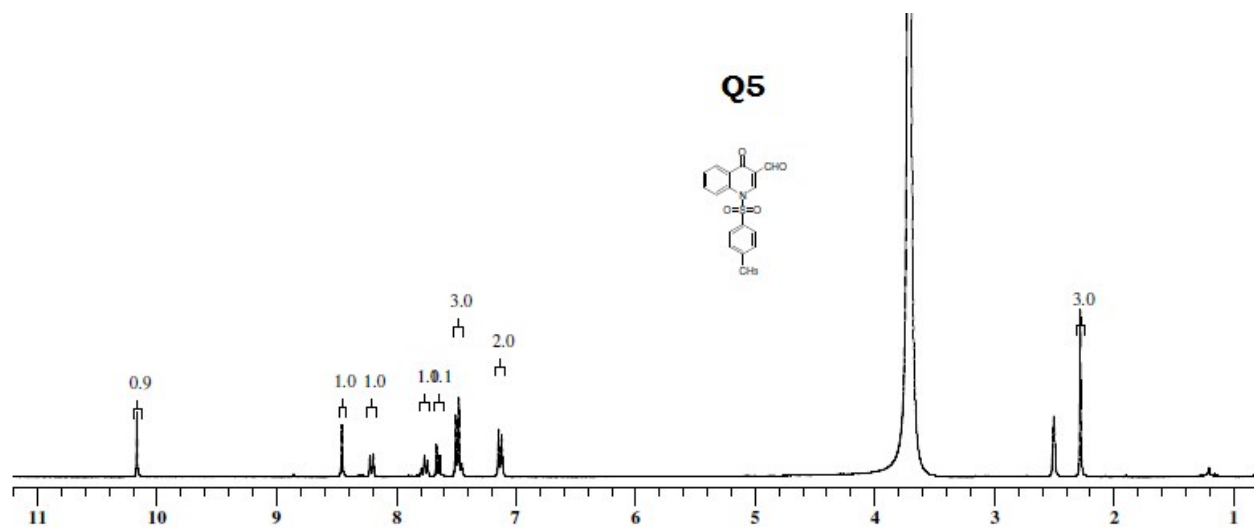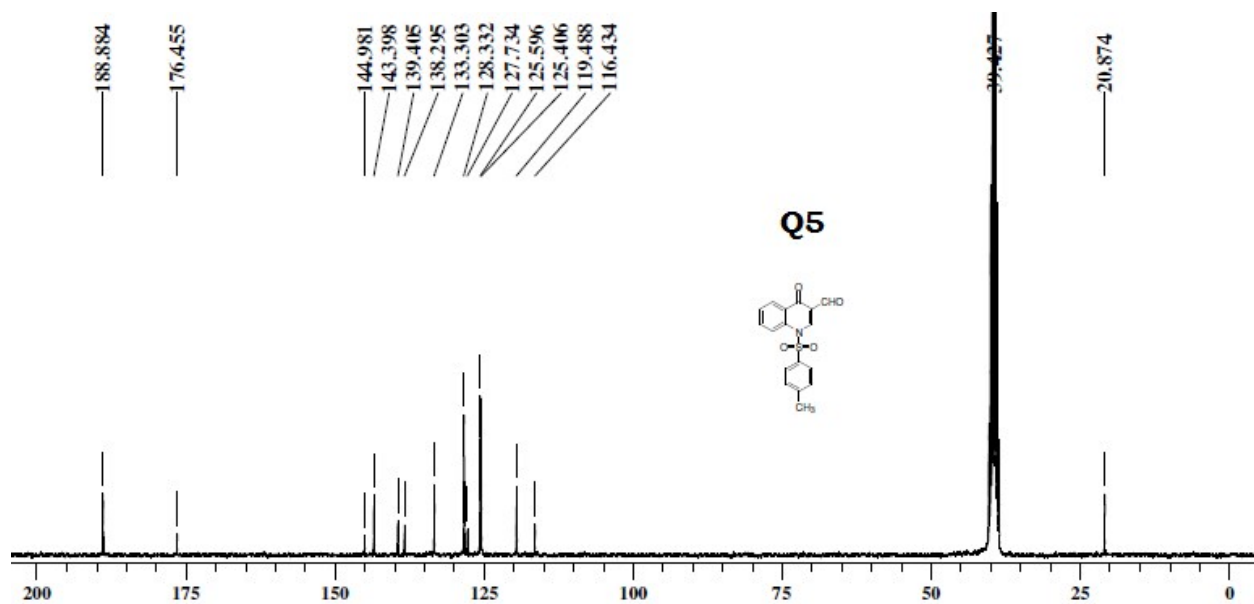

tert-butyl 3-formyl-1H-indole-1-carboxylate (**Q7**):

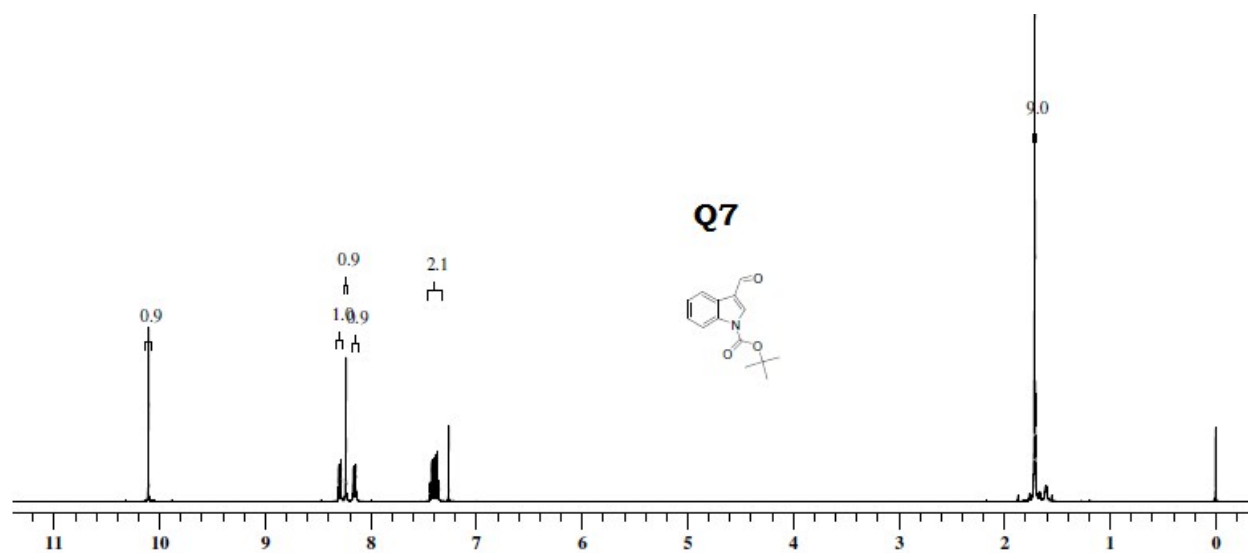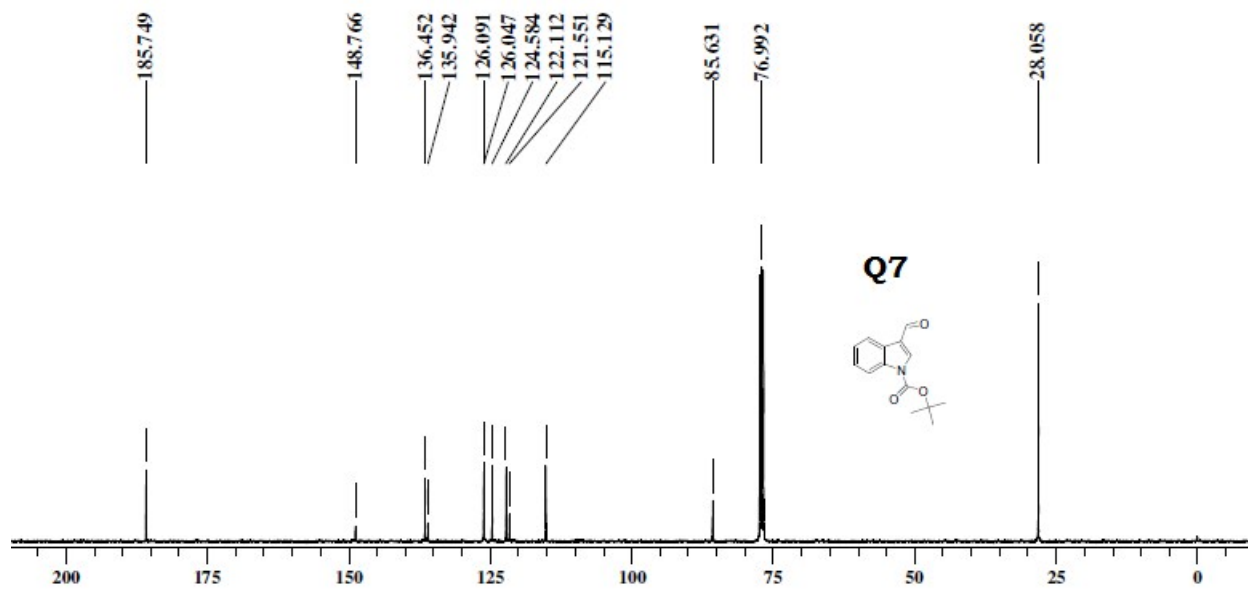

3-(dimethoxymethyl)quinolin-4(1H)-one (Q8).

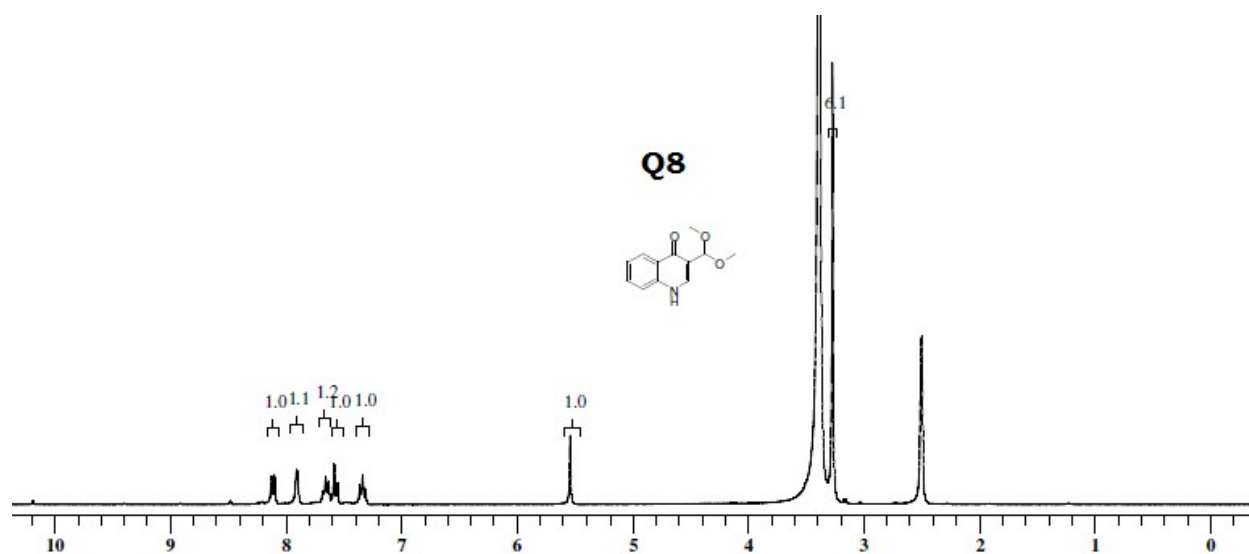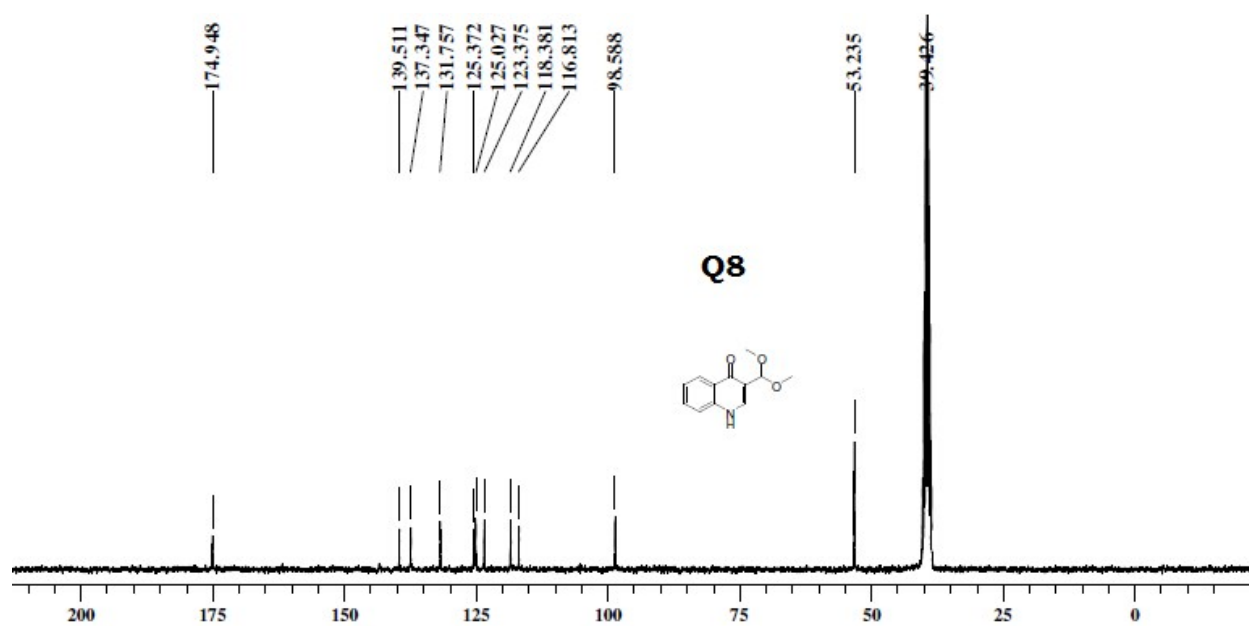



3-((benzo[d]thiazol-2-ylimino)methyl)quinolin-4(1H)-one (Q9):

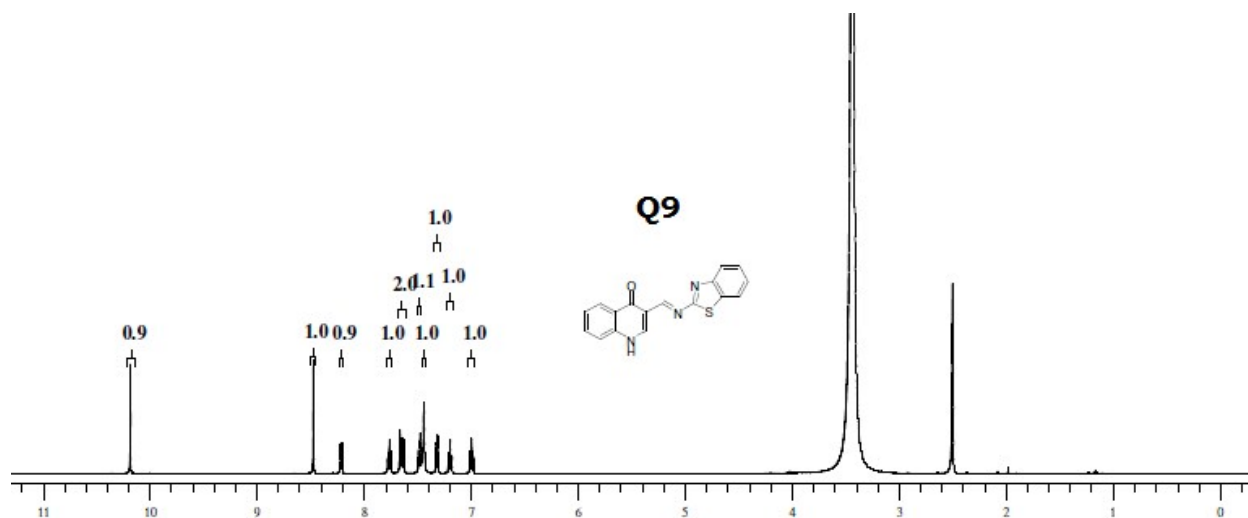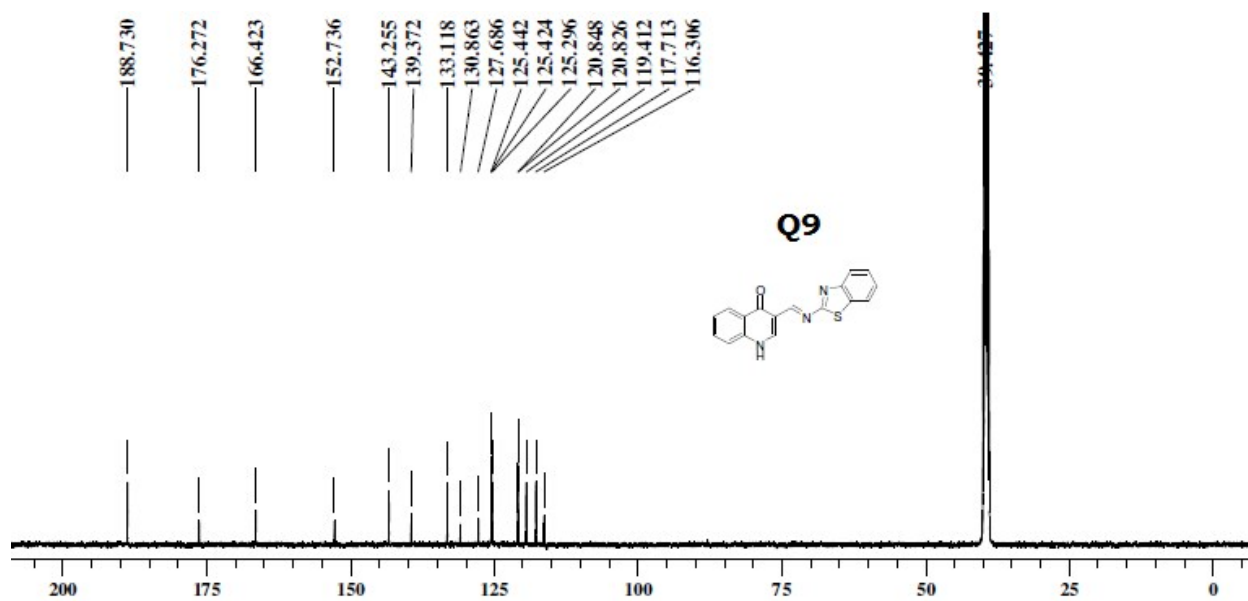

N-((1H-indol-3-yl)methylene)benzo[d]thiazol-2-amine (**Q10**):

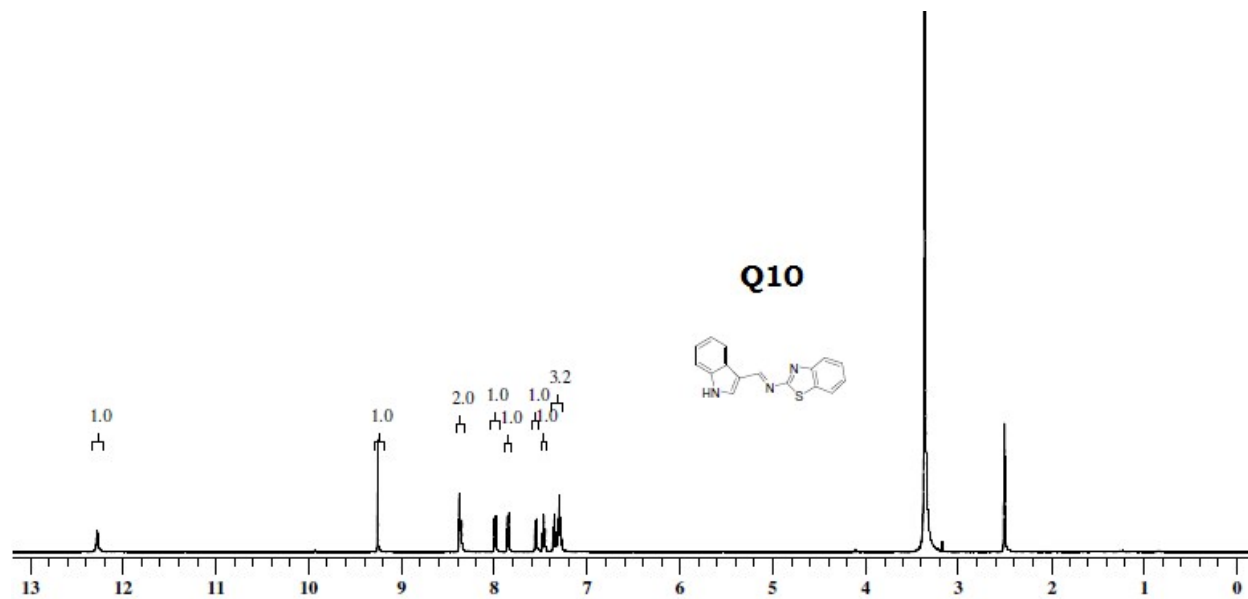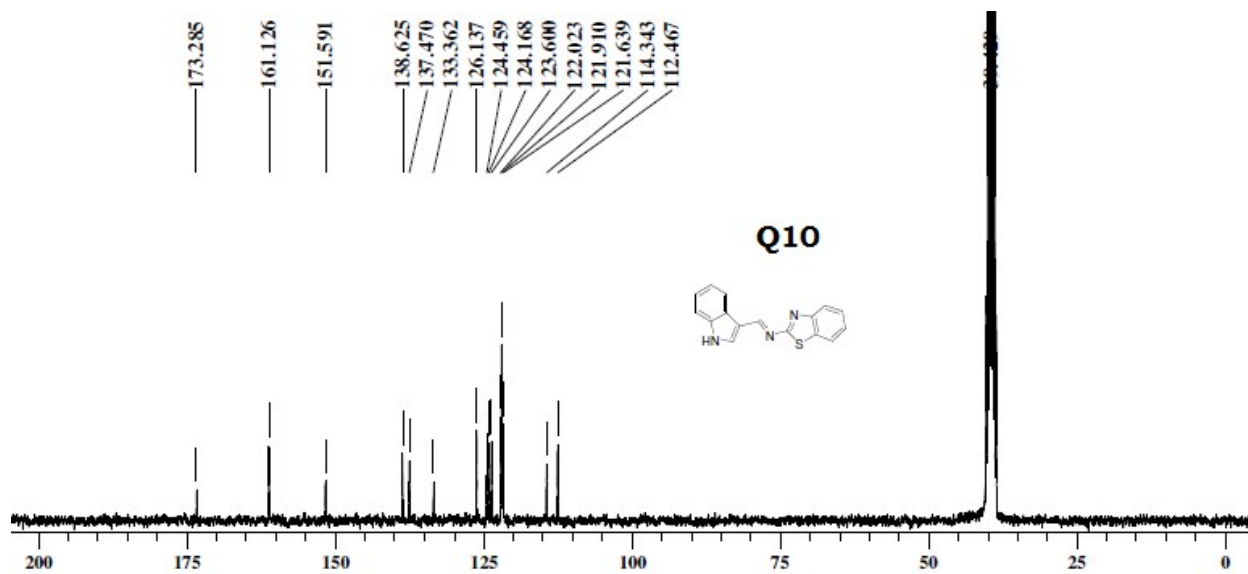

*tert*-butyl 3-((4-chlorobenzo[d]thiazol-2-ylimino)methyl)-1H-indole-1-carboxylate (**Q11**):

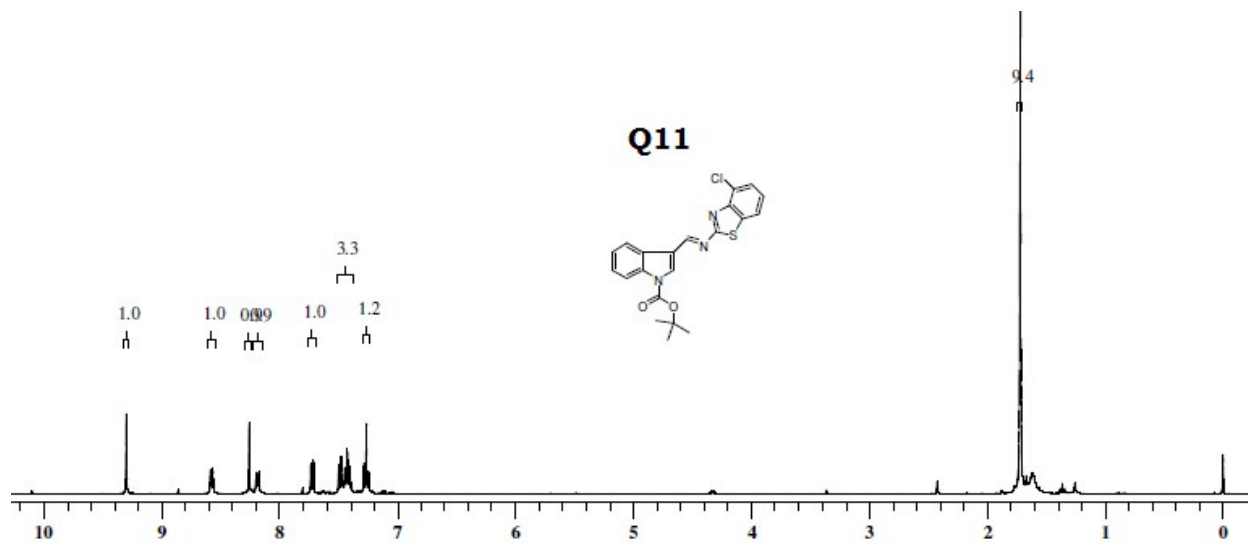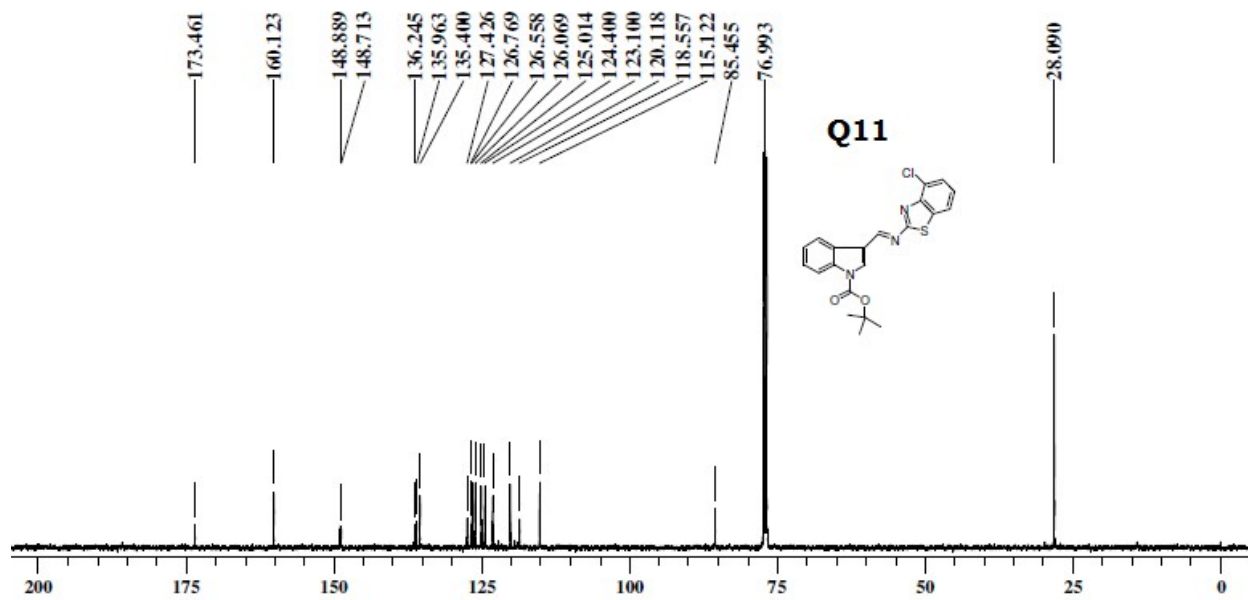

(Z)-3-((benzo[d]thiazol-2-ylamino)methylene)-2-methoxychroman-4-one (**3aa**):

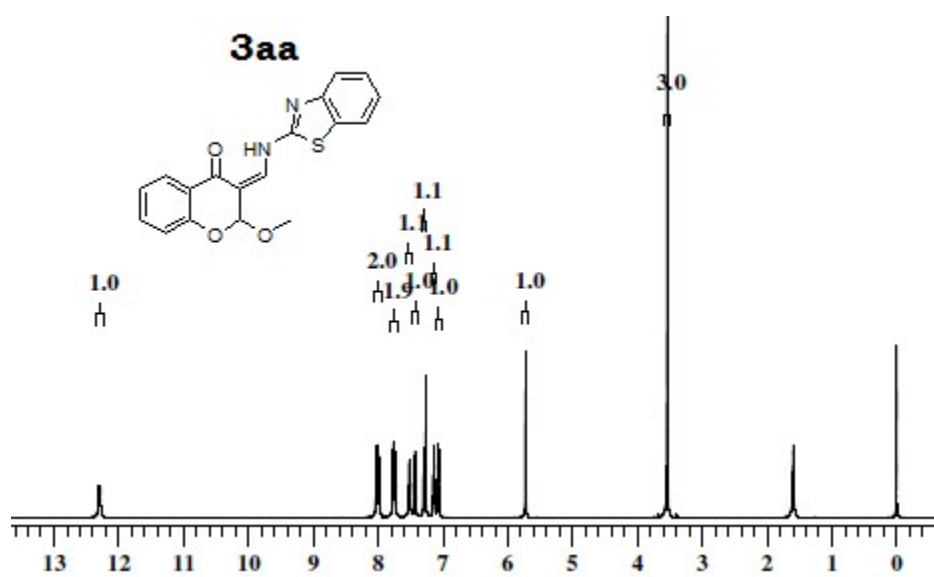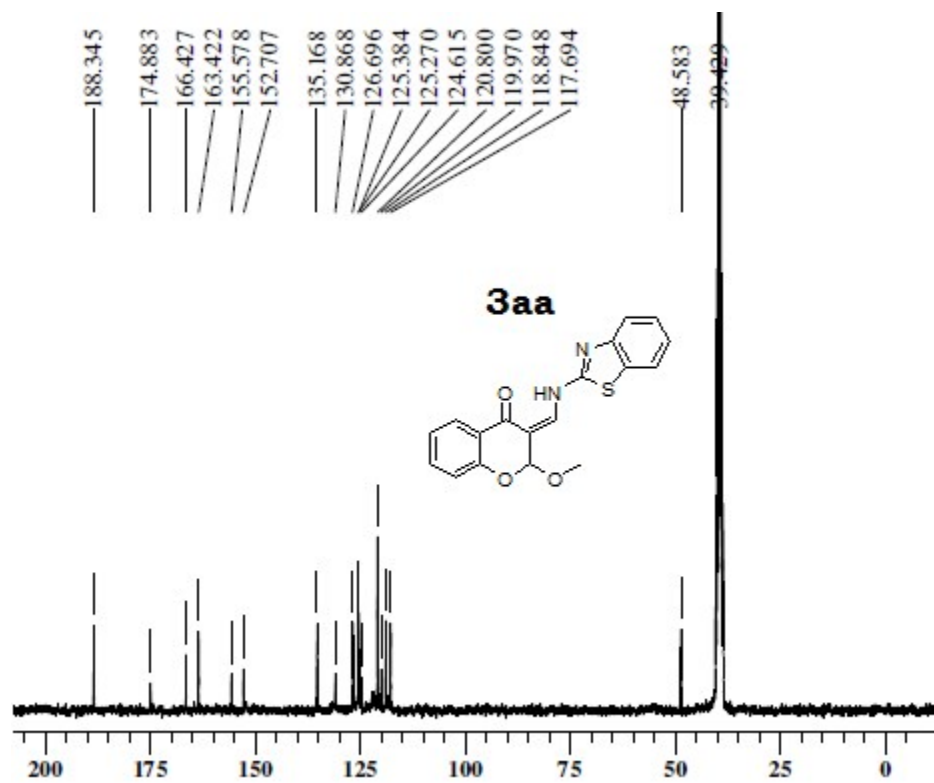

(Z)-3-((6-bromobenzo[d]thiazol-2-ylamino)methylene)-2-methoxychroman-4-one (**3ab**):

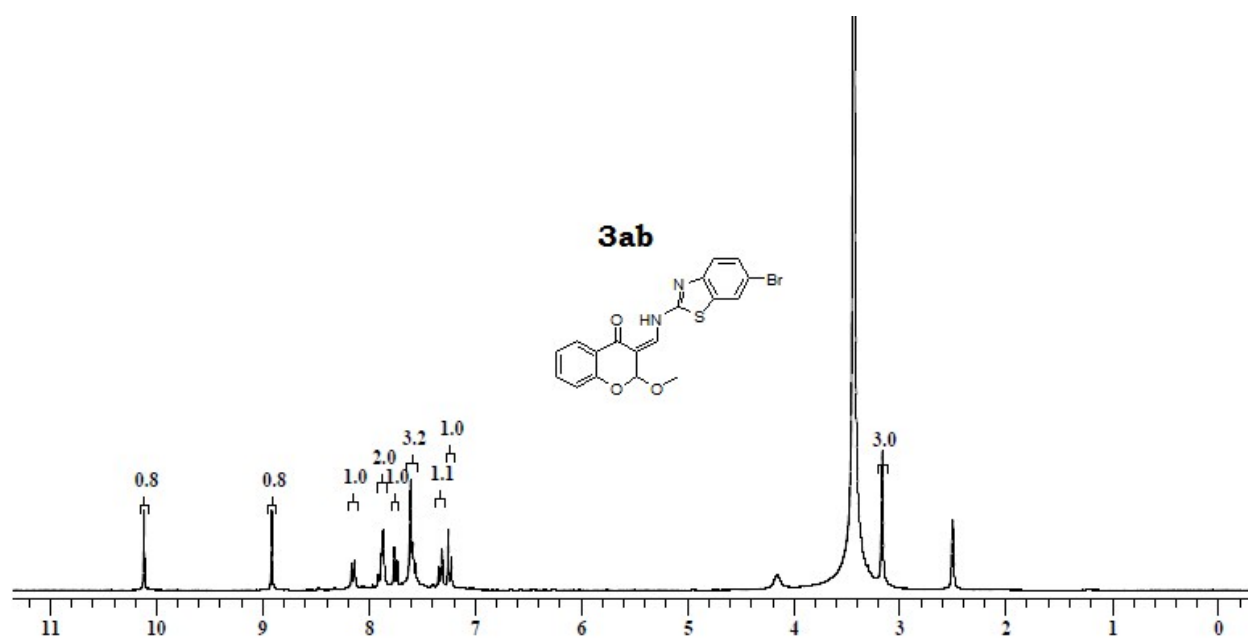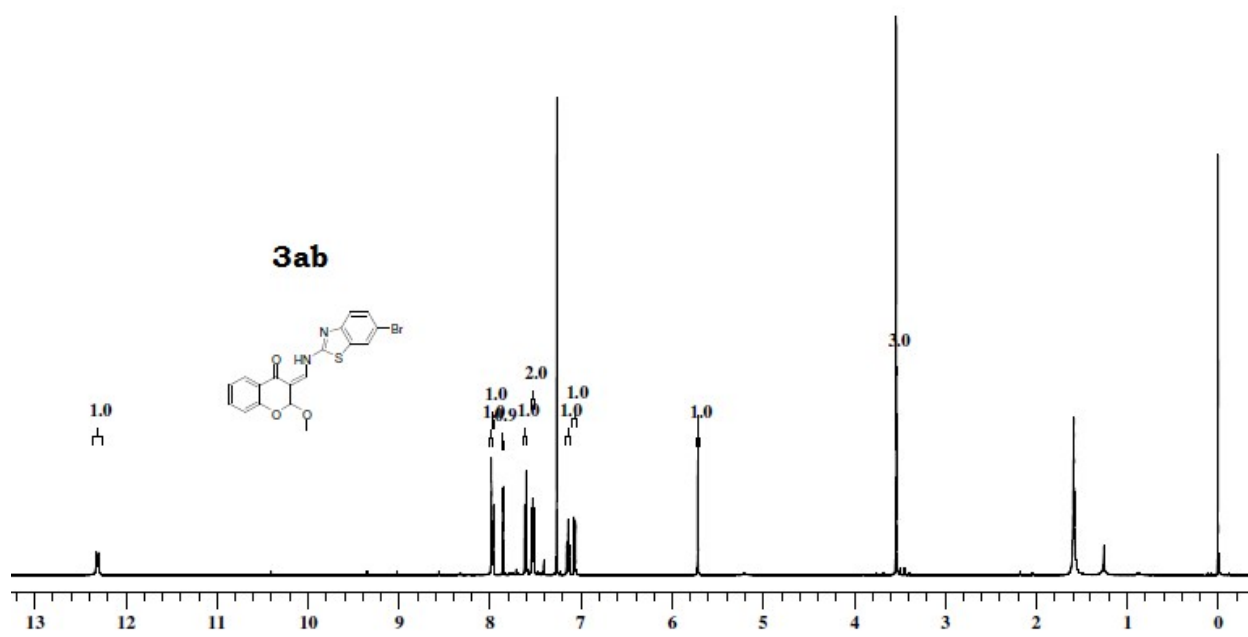

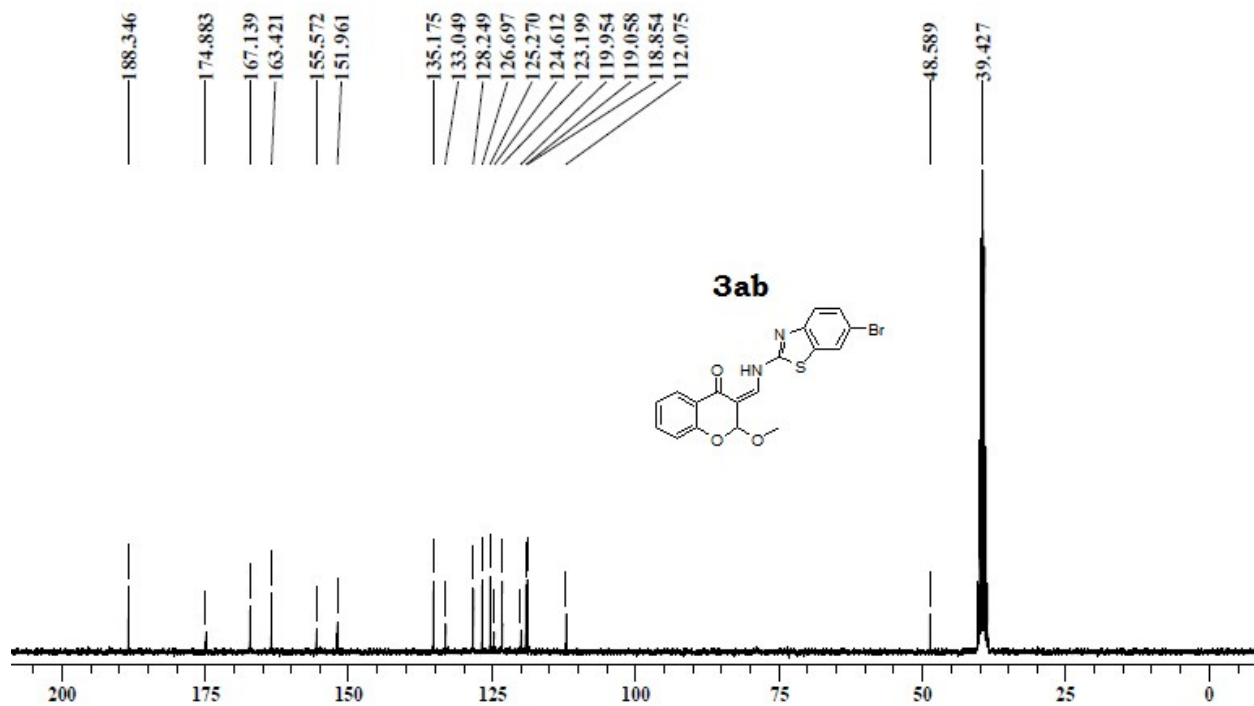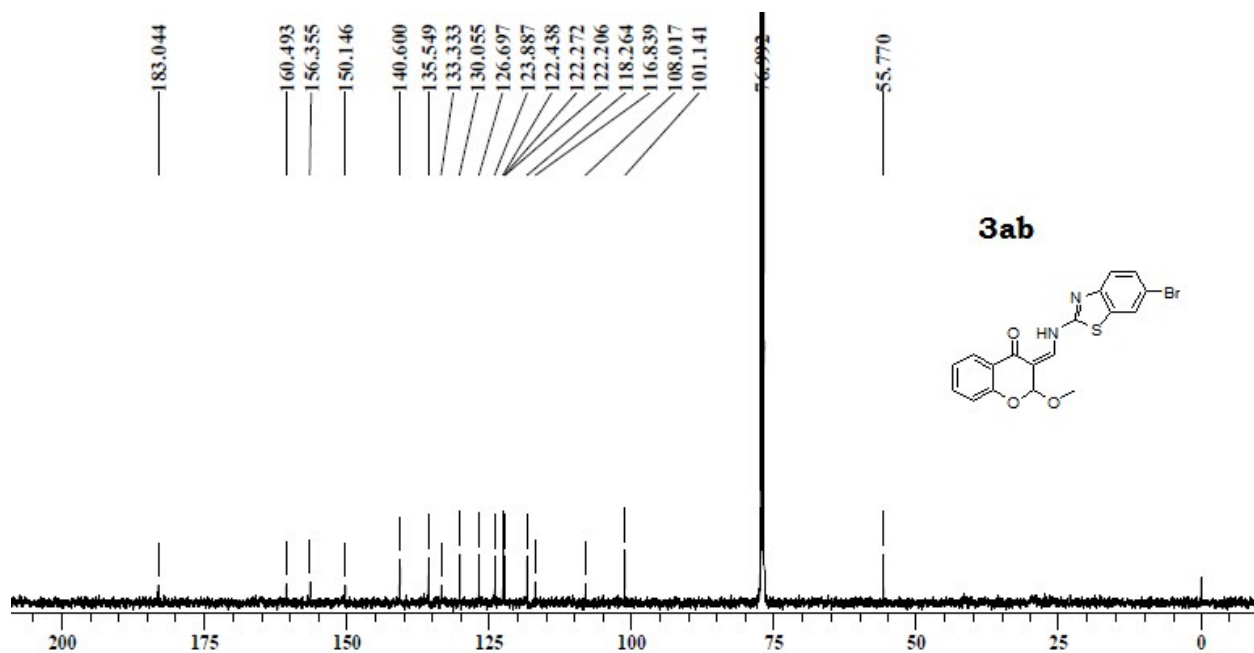

(Z)-2-methoxy-3-((6-methoxybenzo[d]thiazol-2-ylamino)methylene)chroman-4-one (**3ac**):

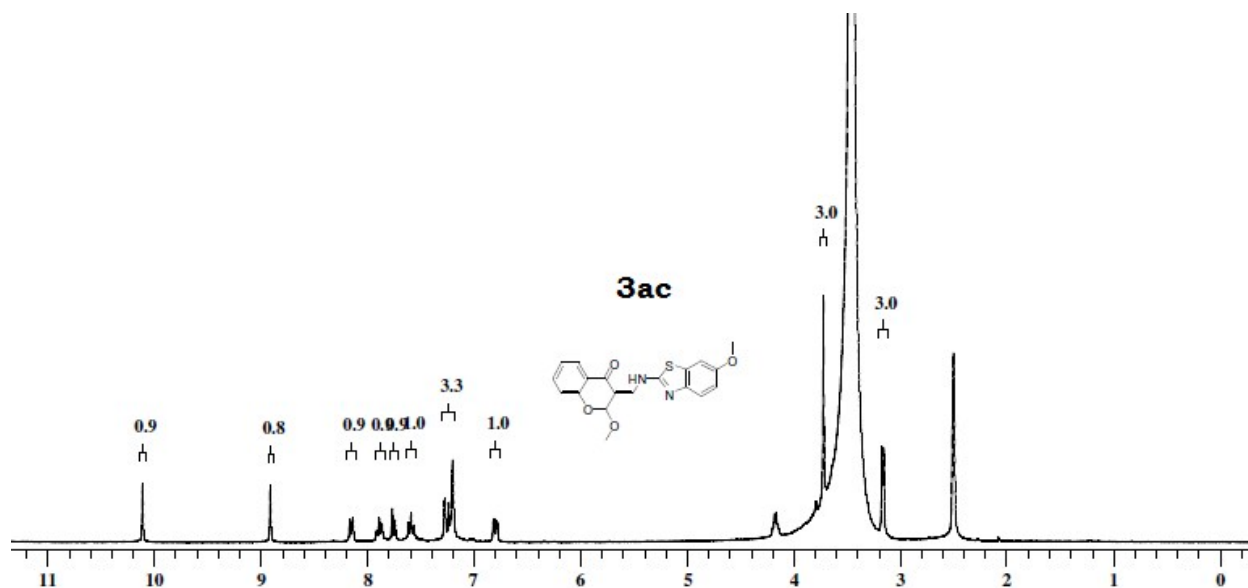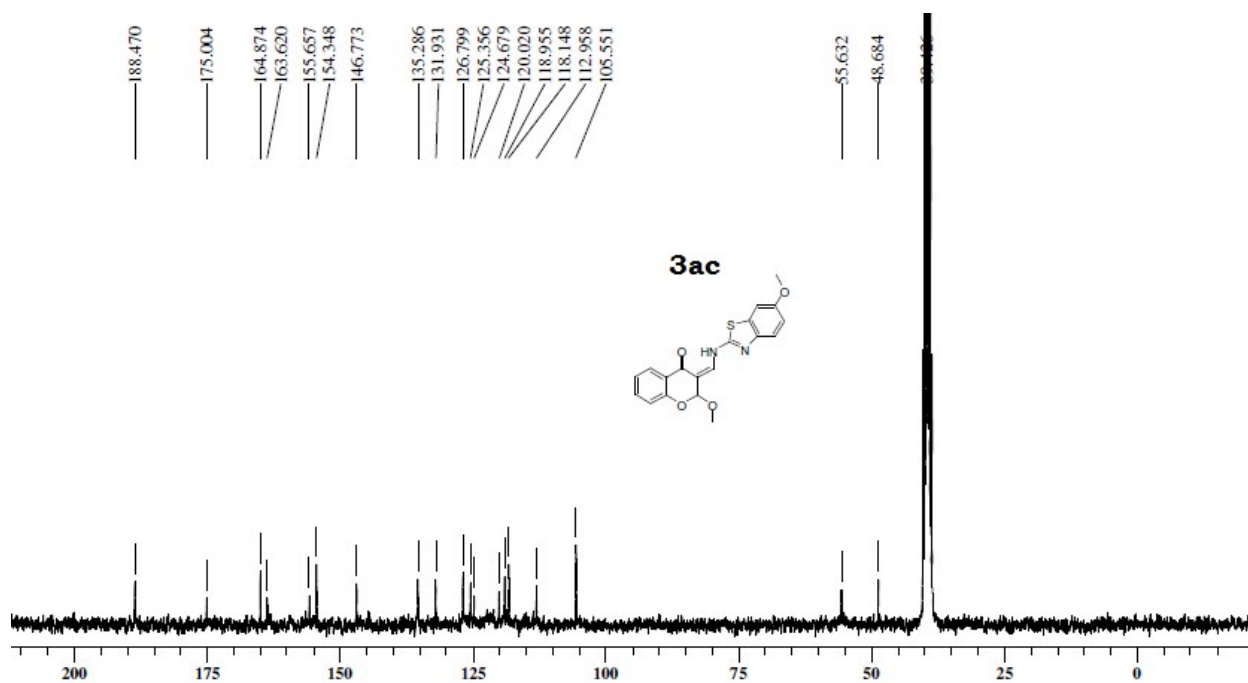

(Z)-3-((4,6-difluorobenzo[d]thiazol-2-ylamino)methylene)-2-methoxychroman-4-one (**3ad**):

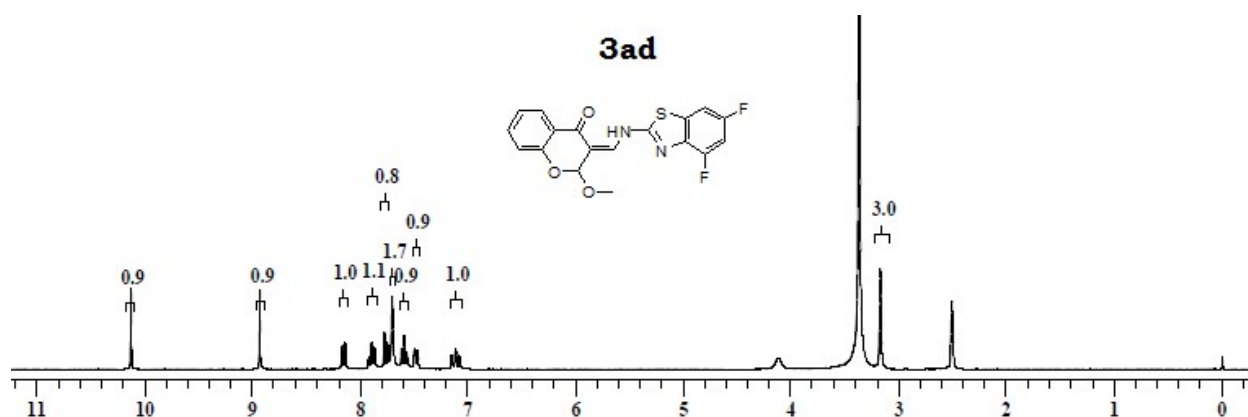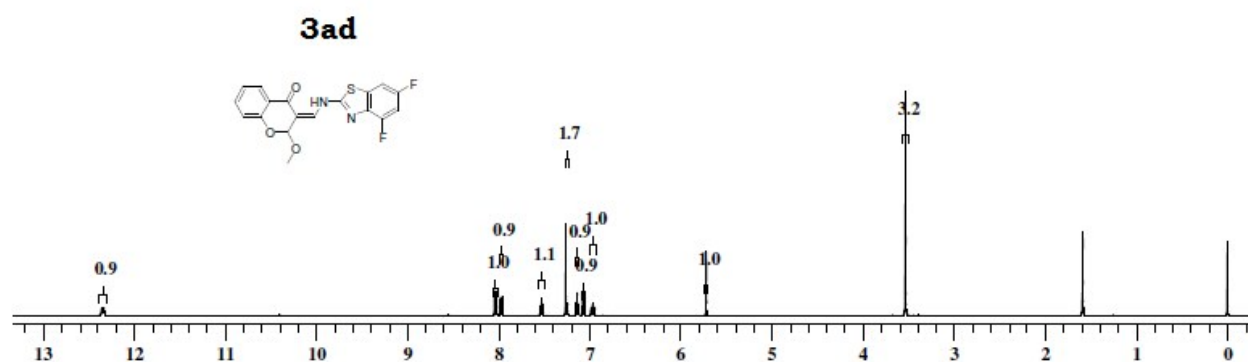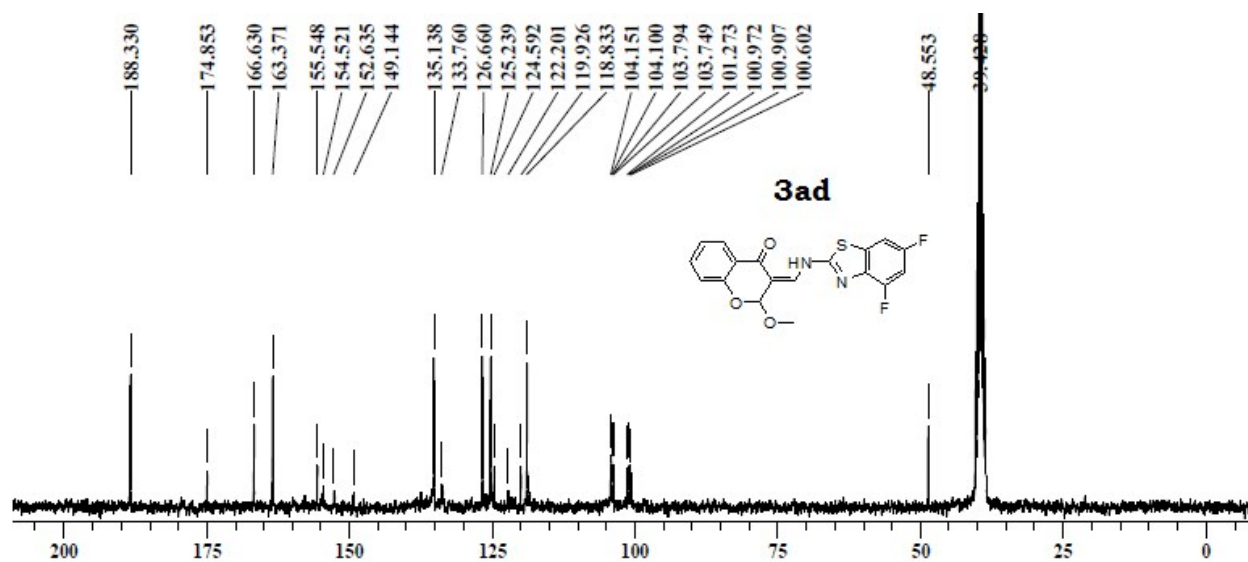



(Z)-3-((benzo[d]thiazol-2-ylamino)methylene)-6-chloro-2-methoxychroman-4-one (**3ae**):

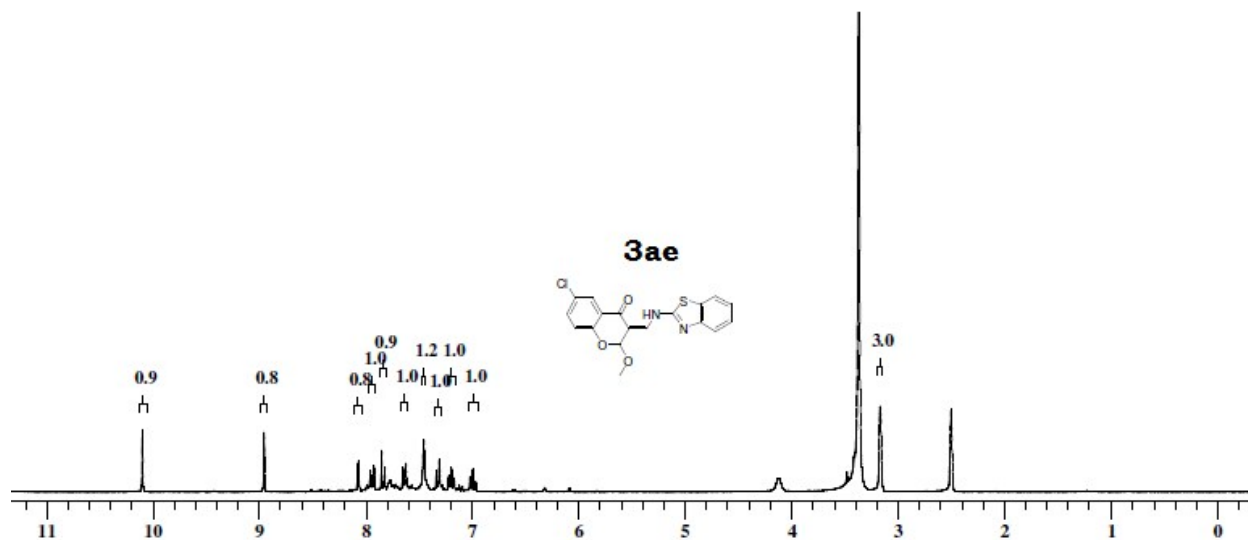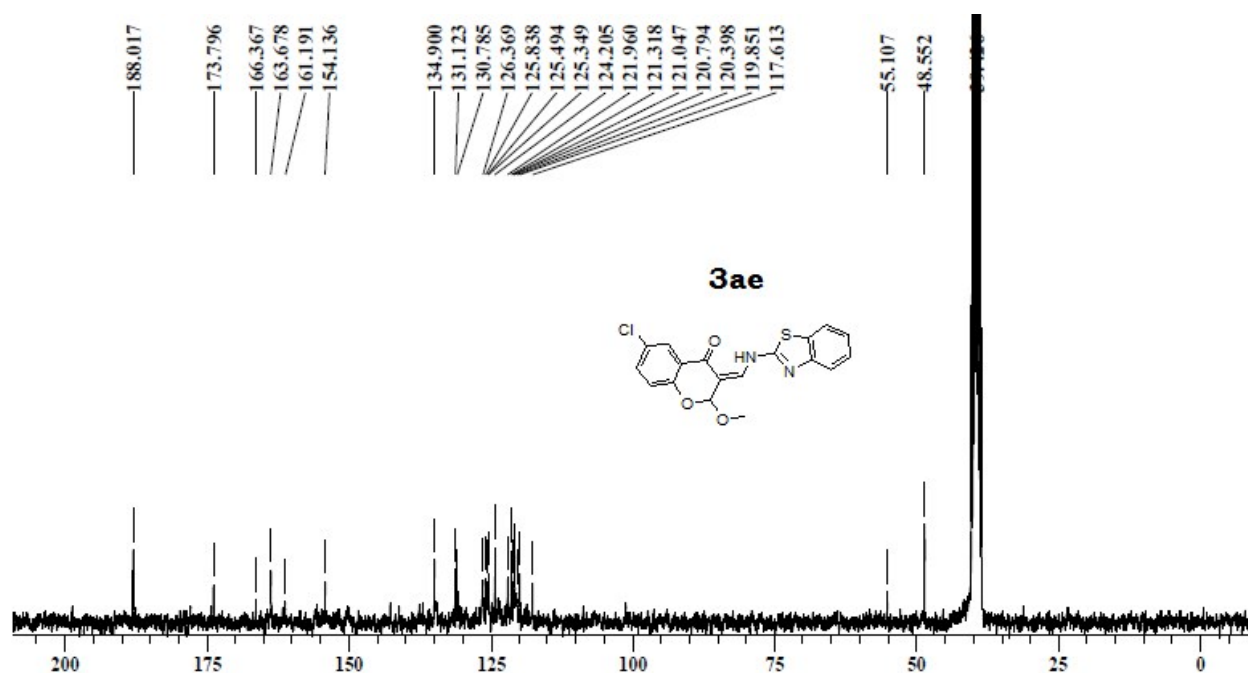

(Z)-3-((benzo[d]thiazol-2-ylamino)methylene)-6-bromo-2-methoxychroman-4-one (**3af**):

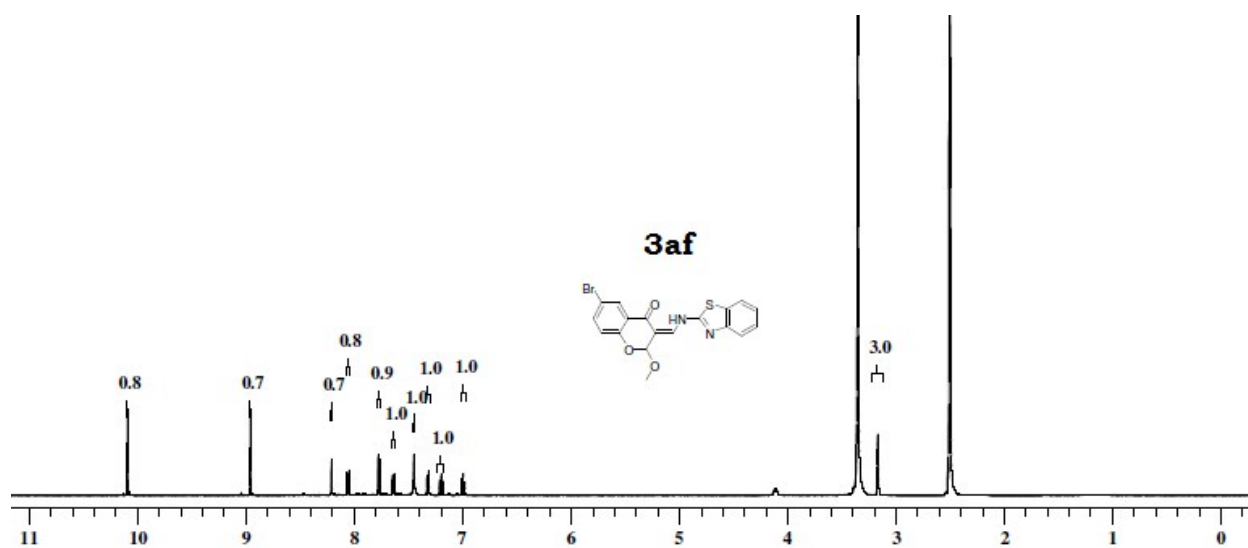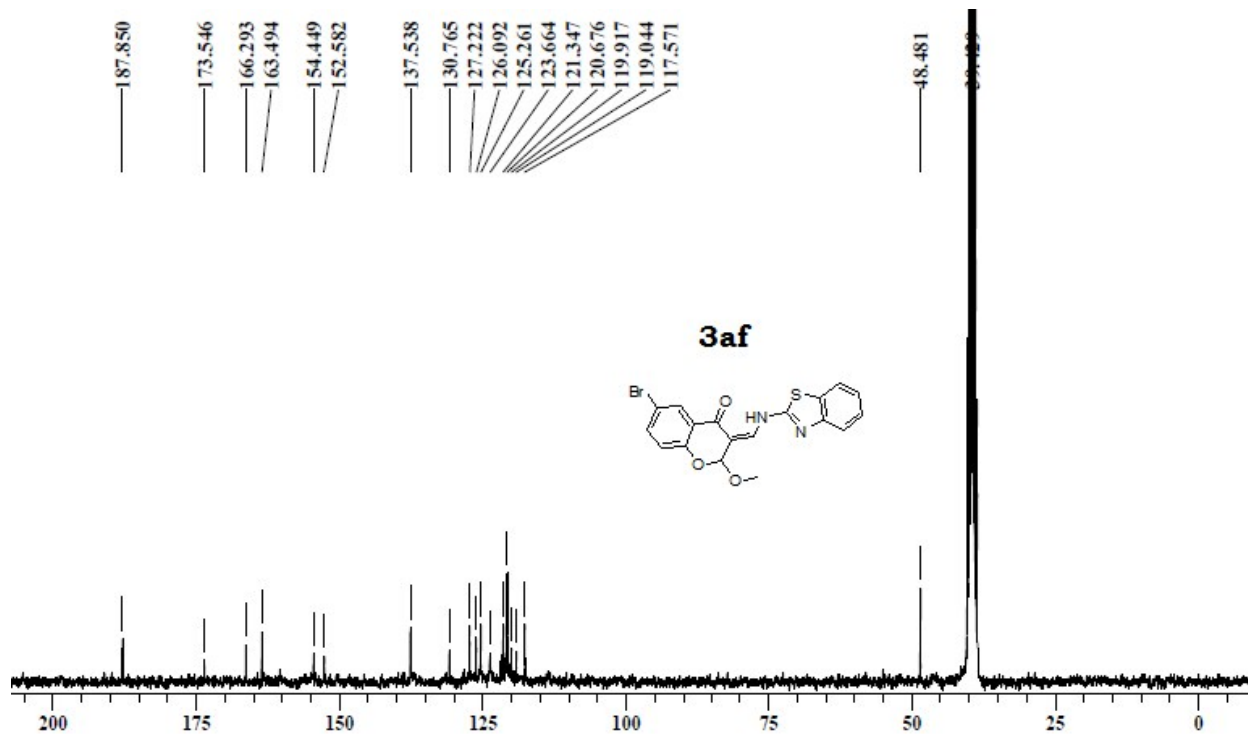

(Z)-6-chloro-2-methoxy-3-((6-methoxybenzo[d]thiazol-2-ylamino)methylene)chroman-4-one (**3ag**):

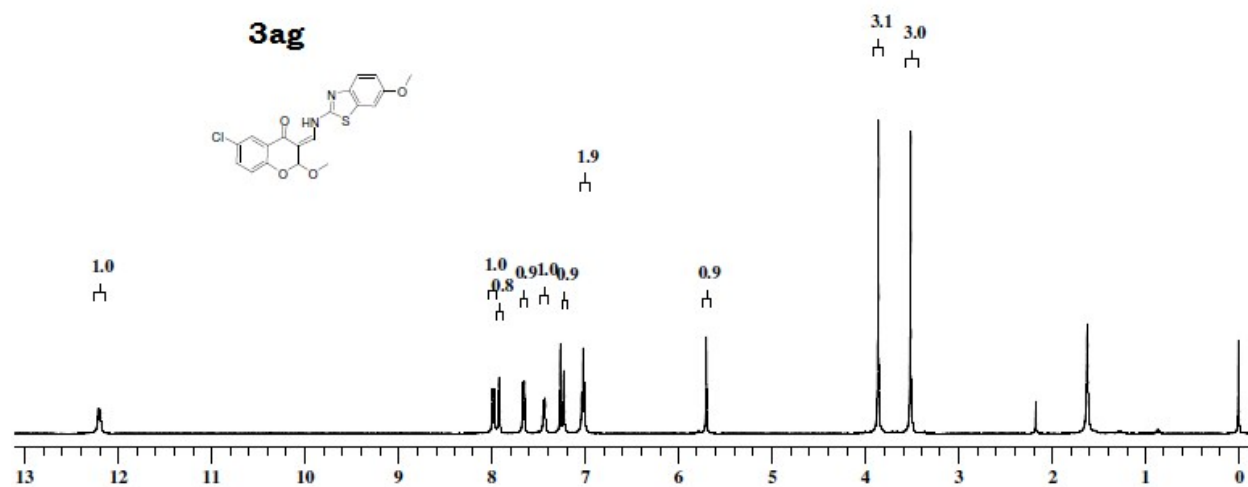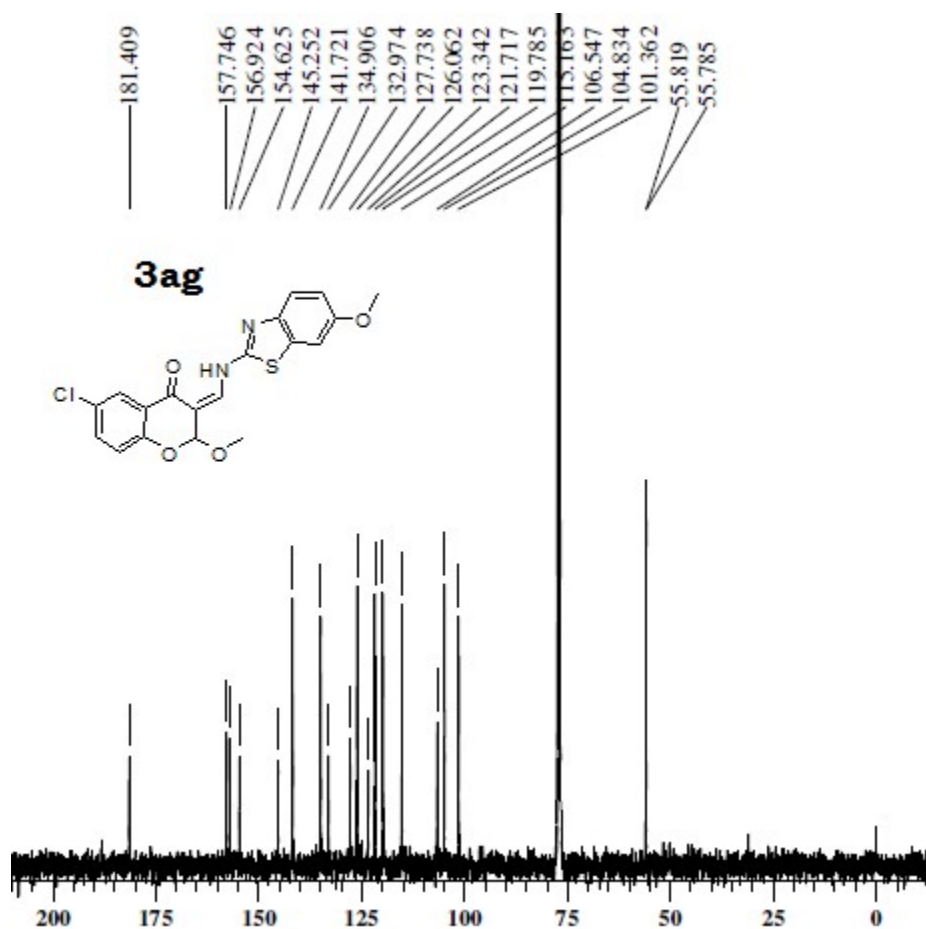

(Z)-6-chloro-2-methoxy-3-((6-(trifluoromethoxy)benzo[d]thiazol-2-ylamino)methylene)chroman-4-one  
**(3ah)**:

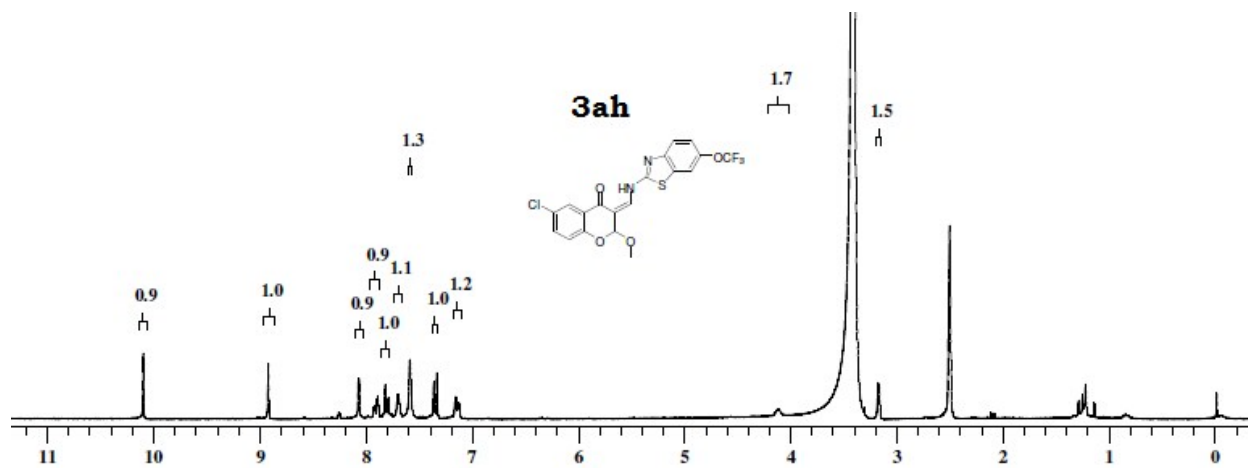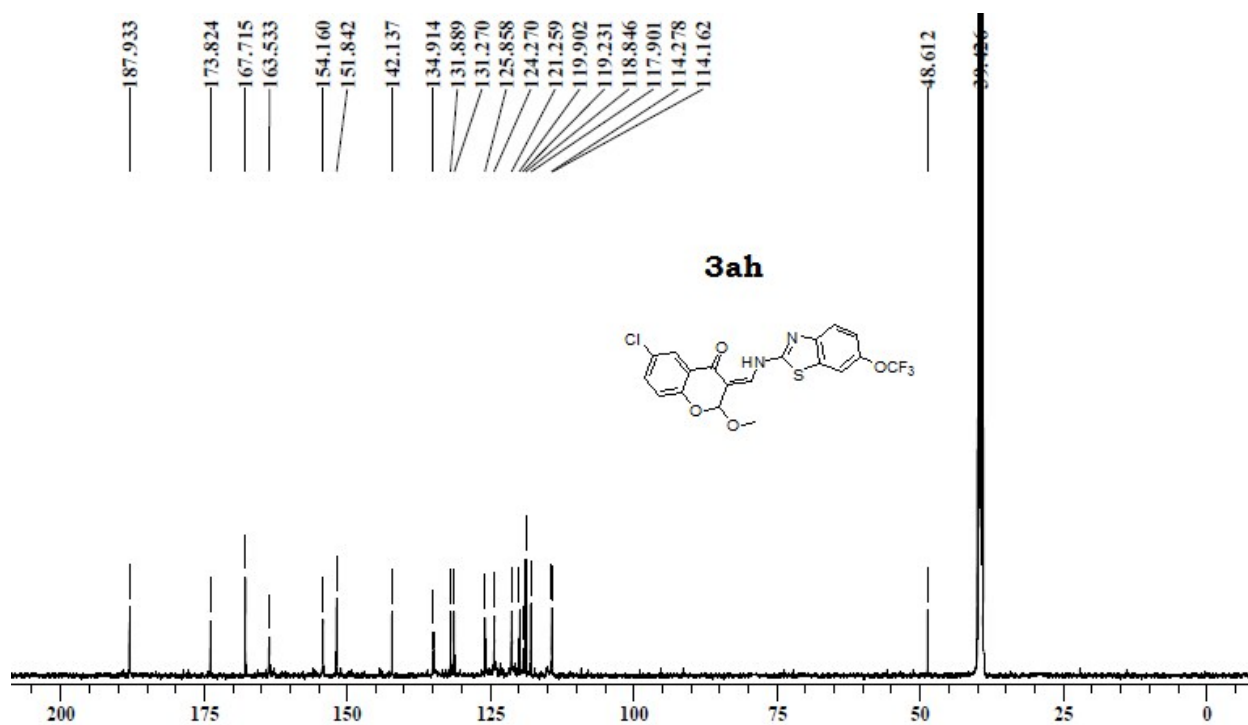

(Z)-6-chloro-3-((4,6-difluorobenzo[d]thiazol-2-ylamino)methylene)-2-methoxychroman-4-one (**3ai**):

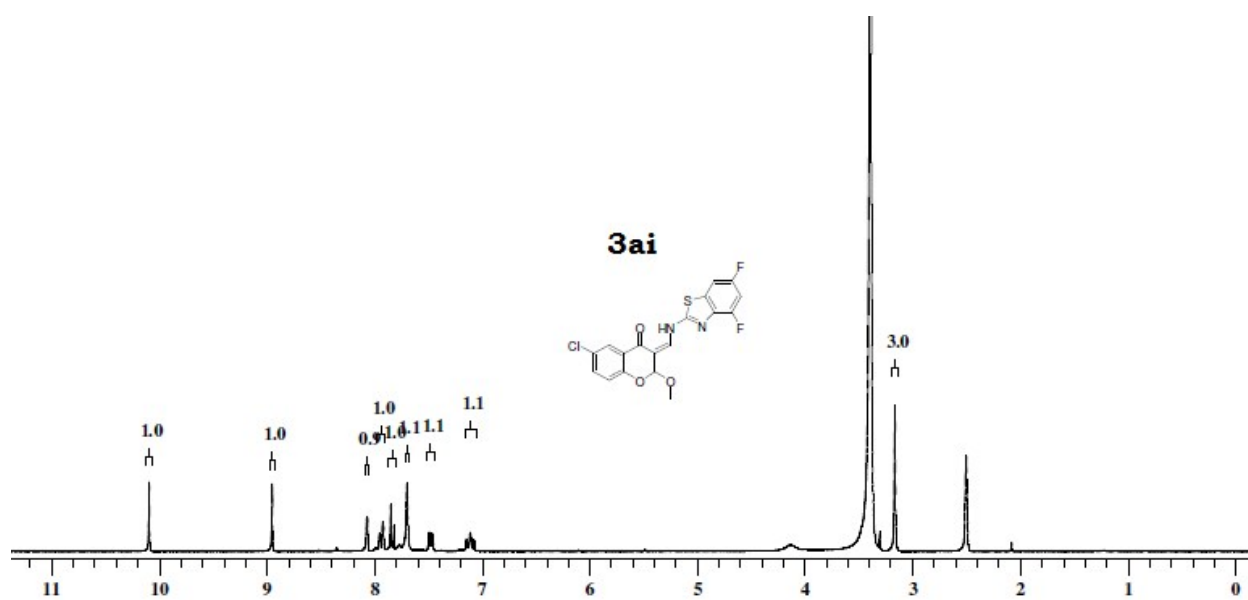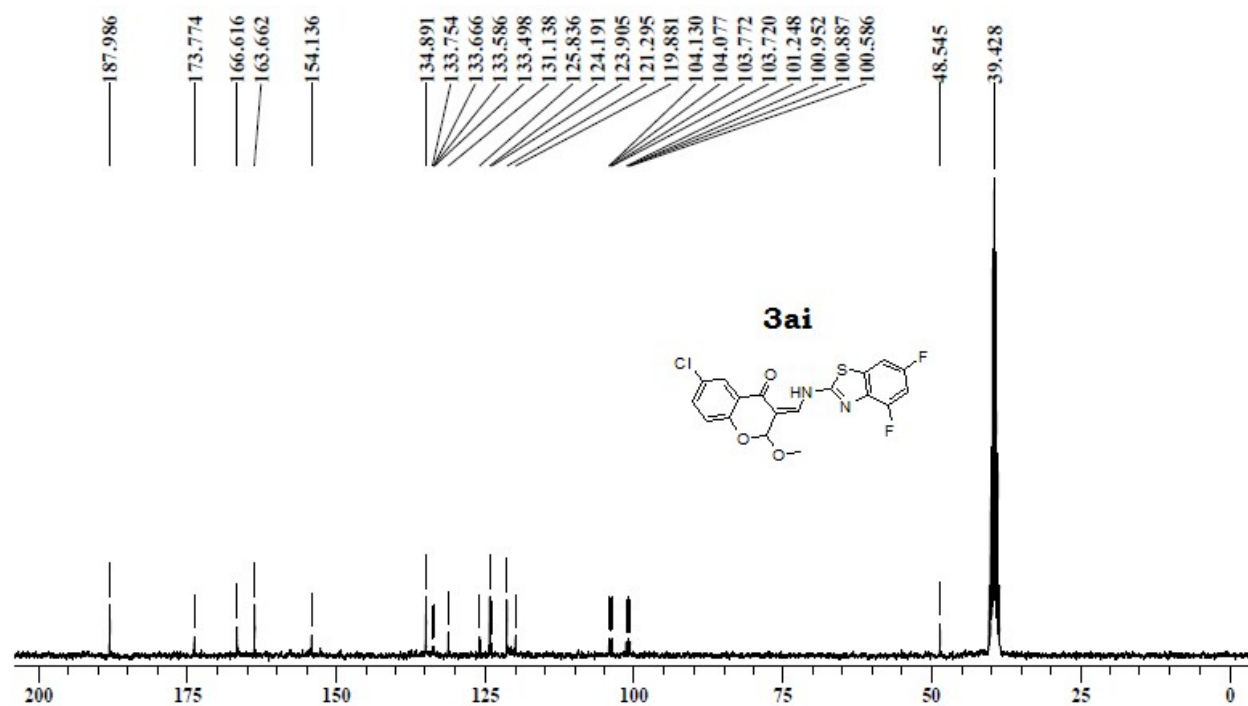

(Z)-3-((6-bromobenzo[d]thiazol-2-ylamino)methylene)-6-chloro-2-methoxychroman-4-one (**3aj**):

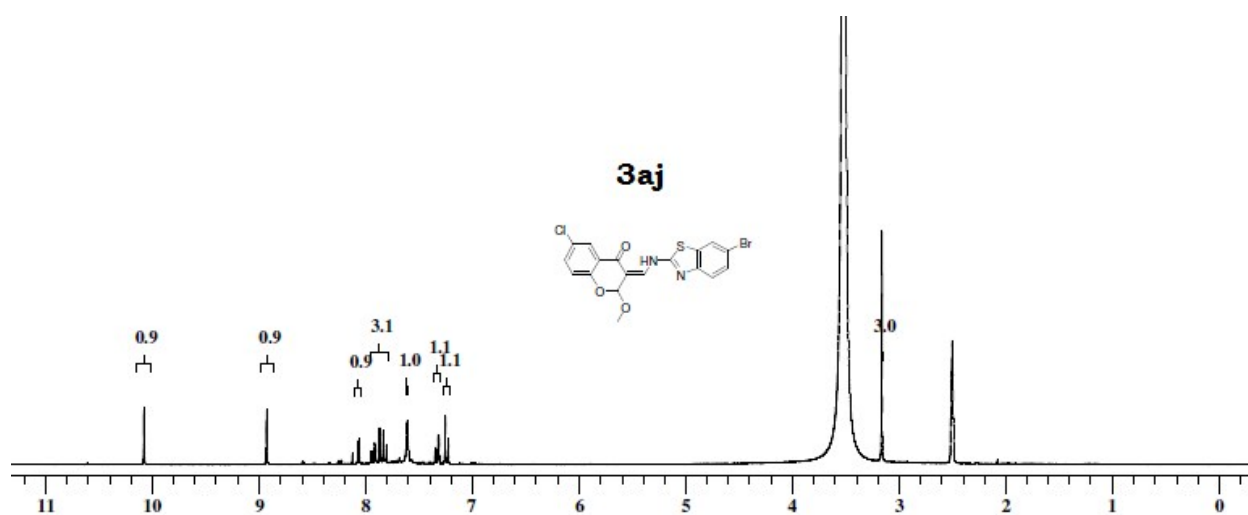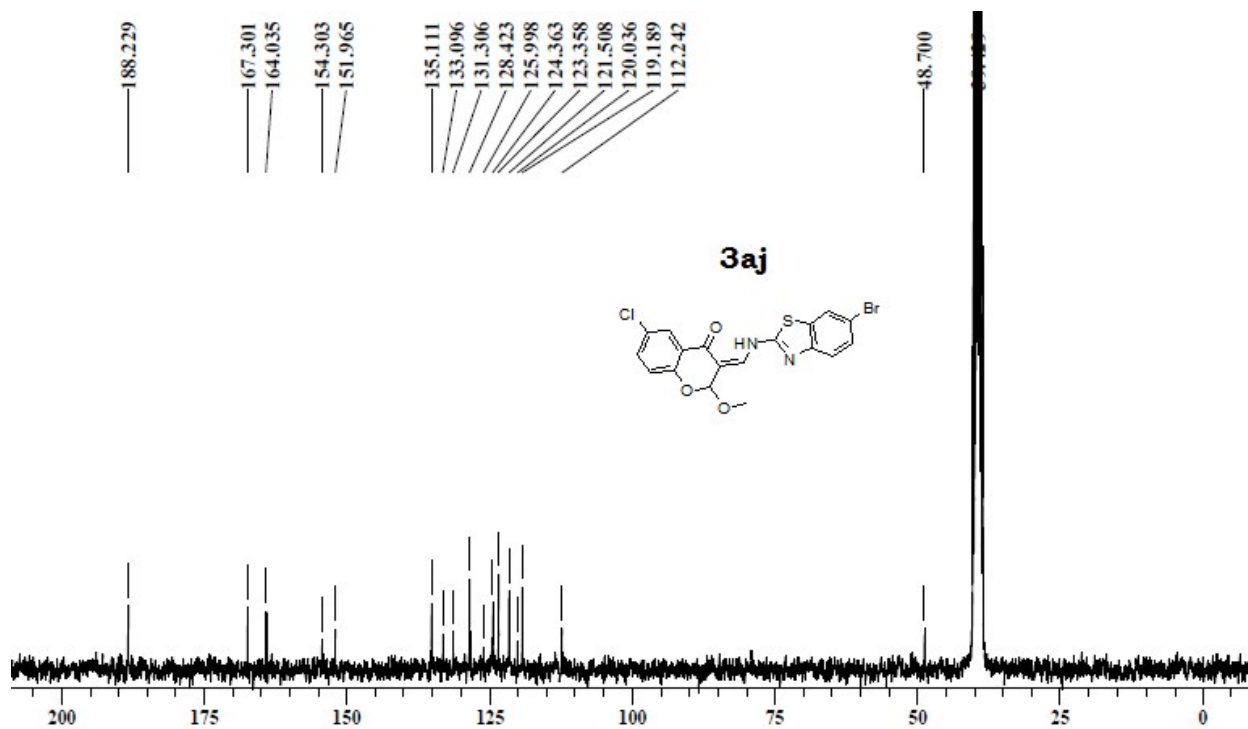

(Z)-6-chloro-2-methoxy-3-((6-methylbenzo[d]thiazol-2-ylamino)methylene)chroman-4-one (**3ak**):

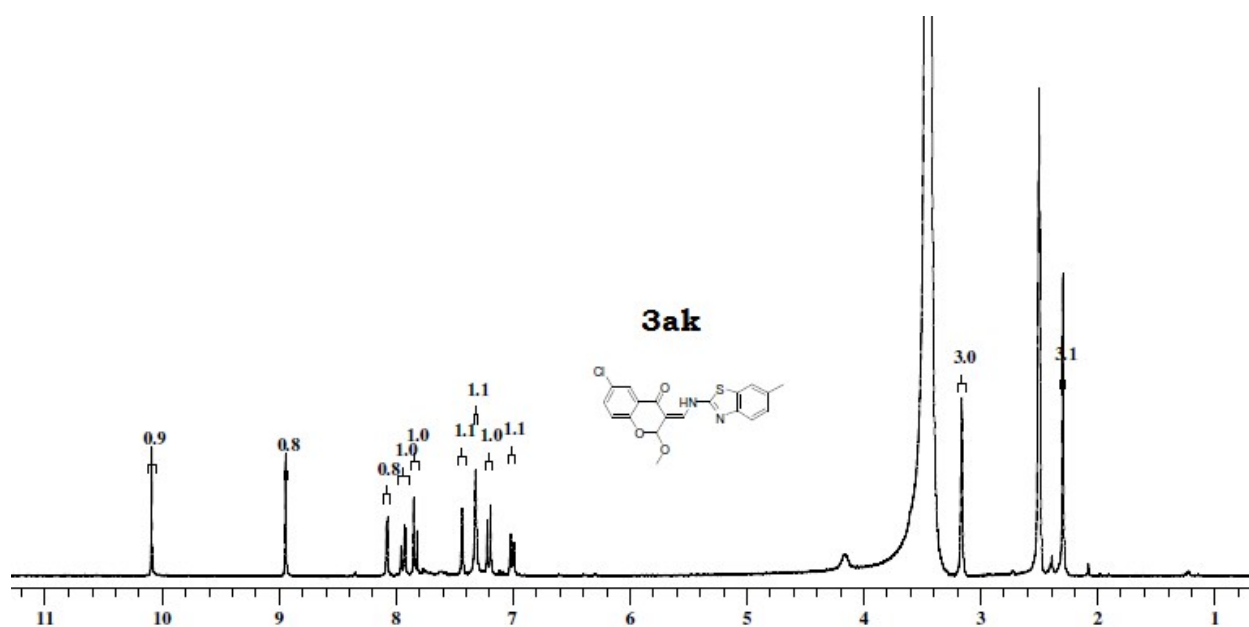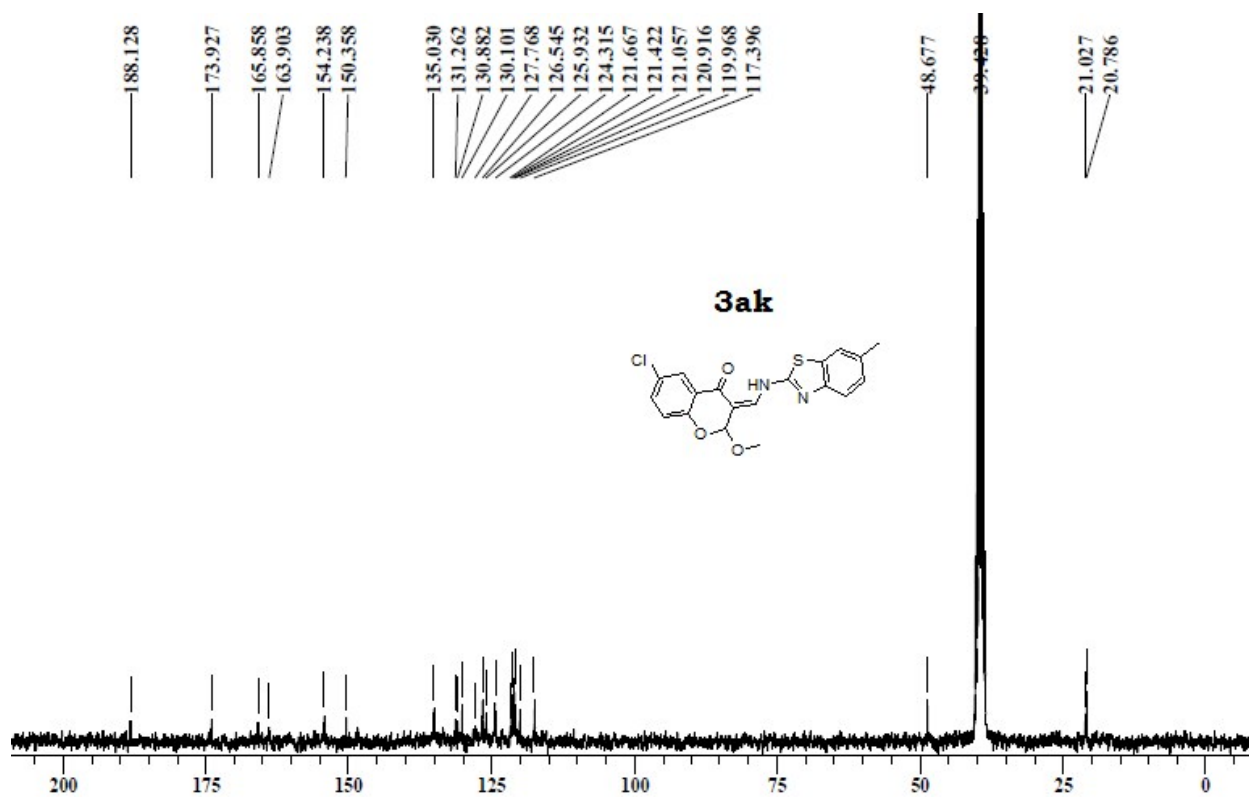

(Z)-6-bromo-3-((6-bromobenzo[d]thiazol-2-ylamino)methylene)-2-methoxychroman-4-one (**3al**):

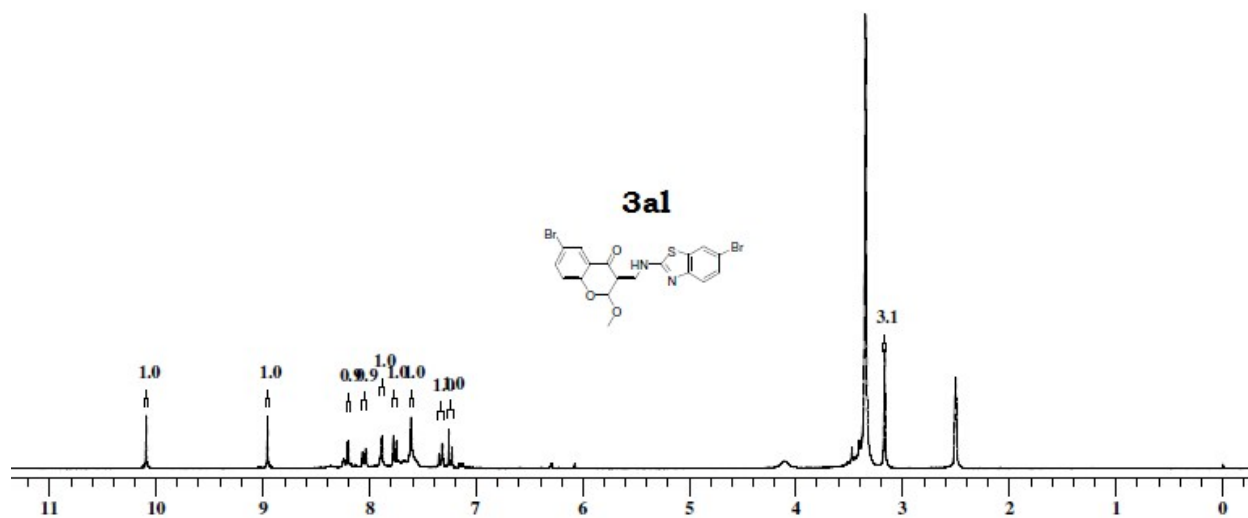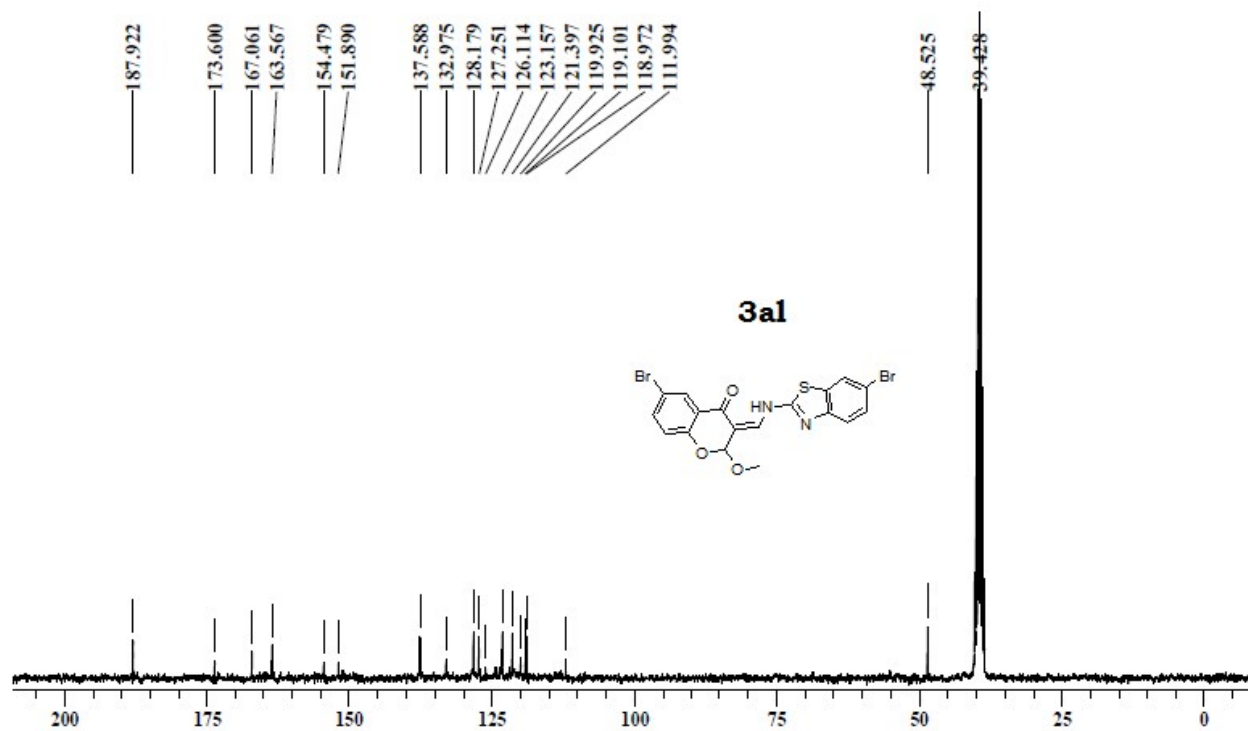



(Z)-6-bromo-3-((4,6-difluorobenzo[d]thiazol-2-ylamino)methylene)-2-methoxychroman-4-one (**3am**):

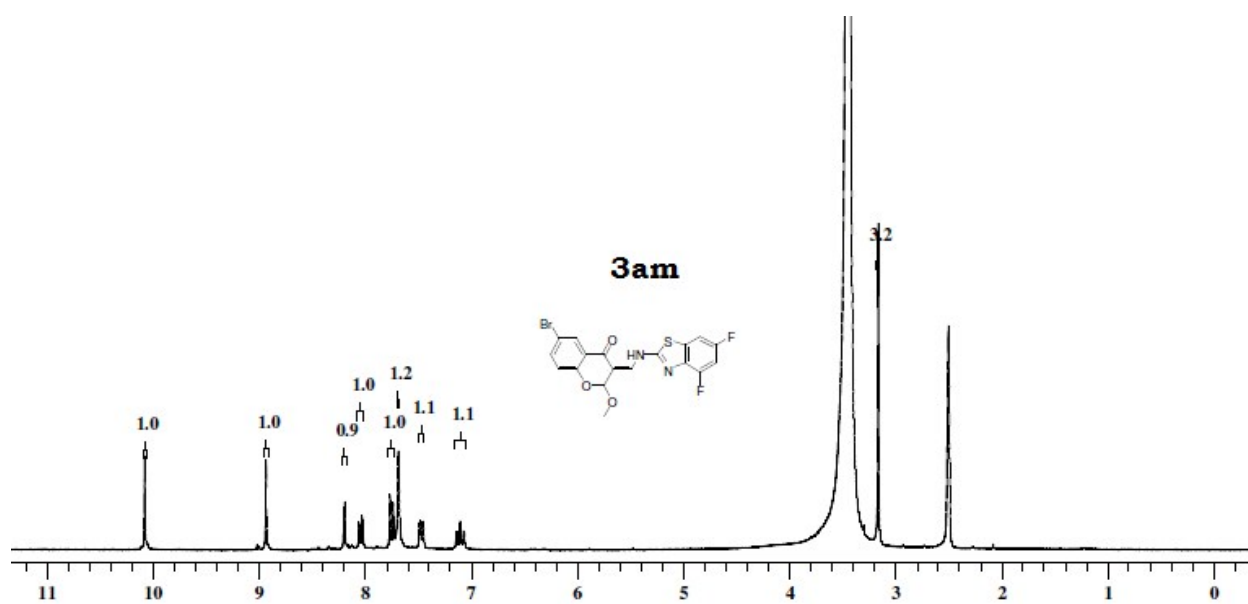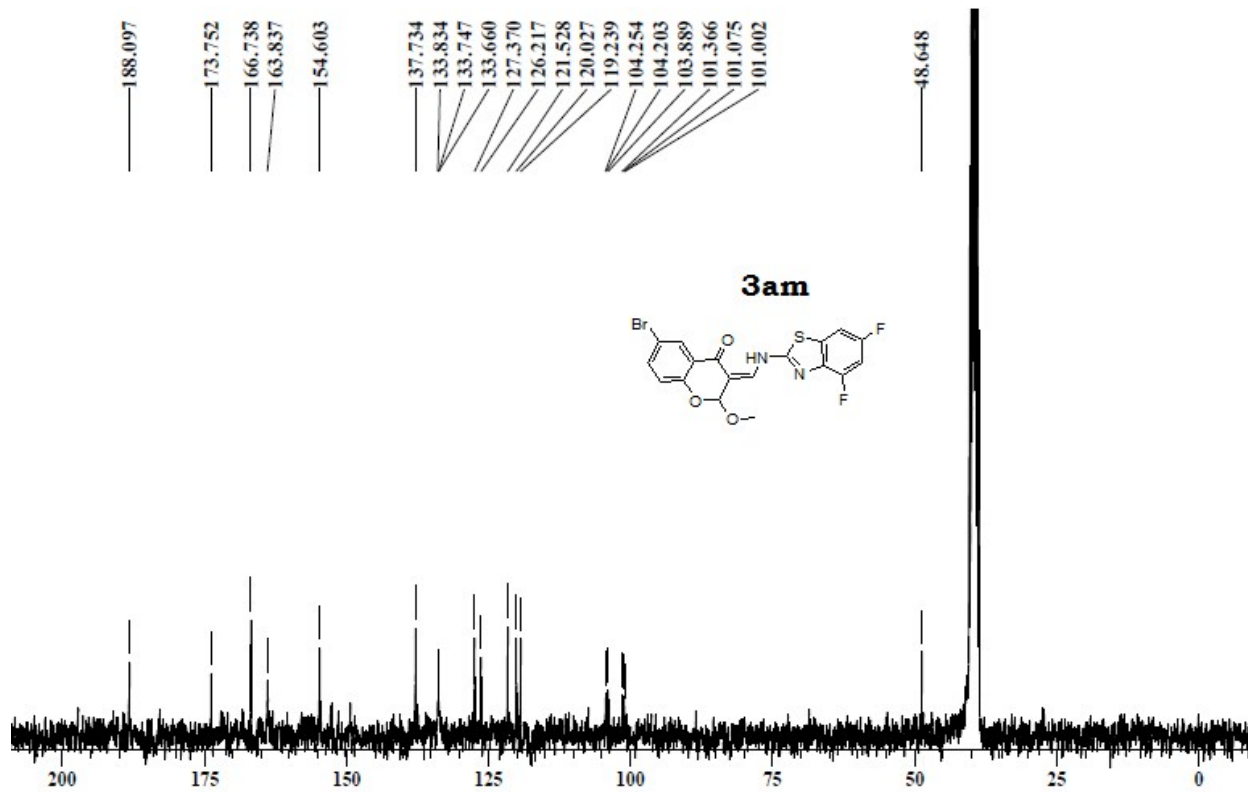

(Z)-6-bromo-3-((6-chloro-4-fluorobenzo[d]thiazol-2-ylamino)methylene)-2-methoxychroman-4-one  
(3an):

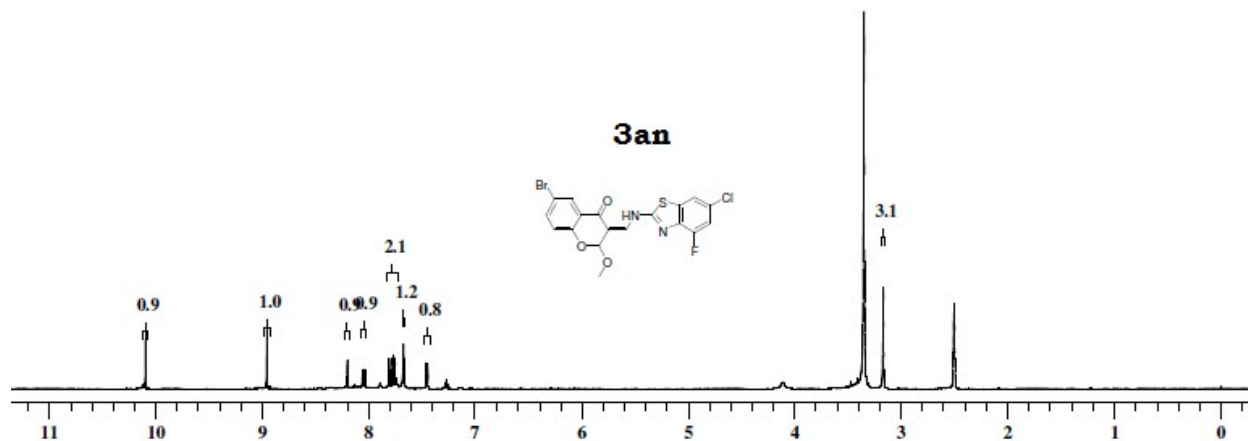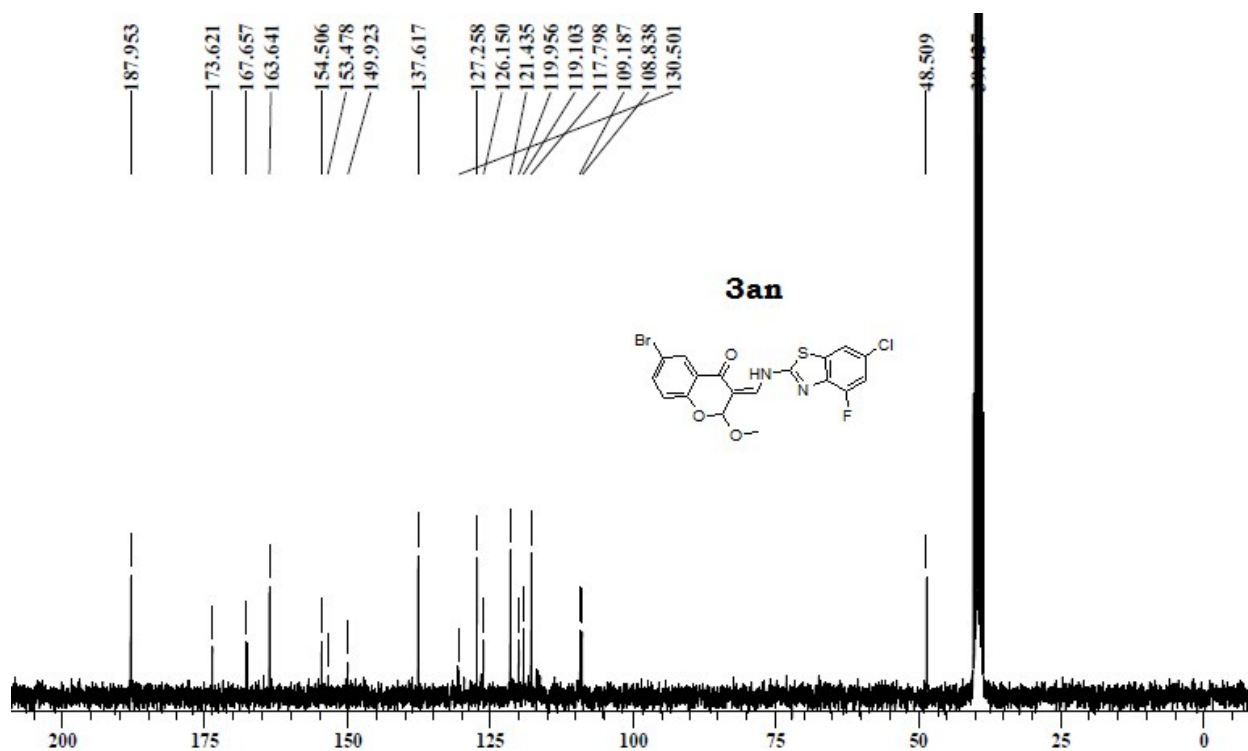

(Z)-6-hydroxy-2-methoxy-3-((6-methoxybenzo[d]thiazol-2-ylamino)methylene)chroman-4-one (**3ao**):

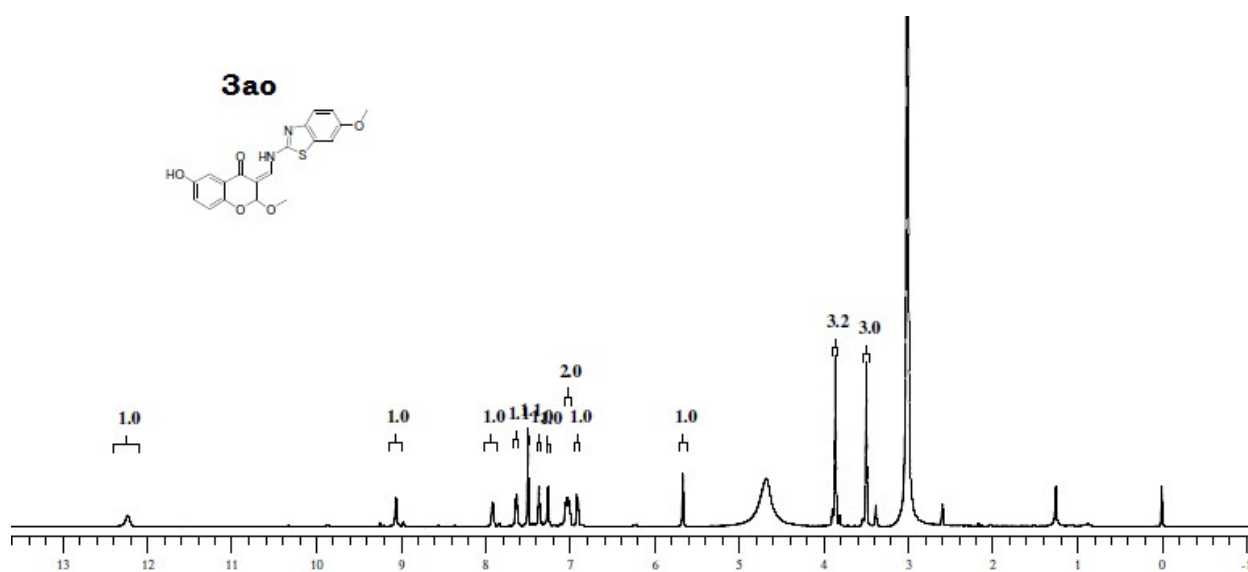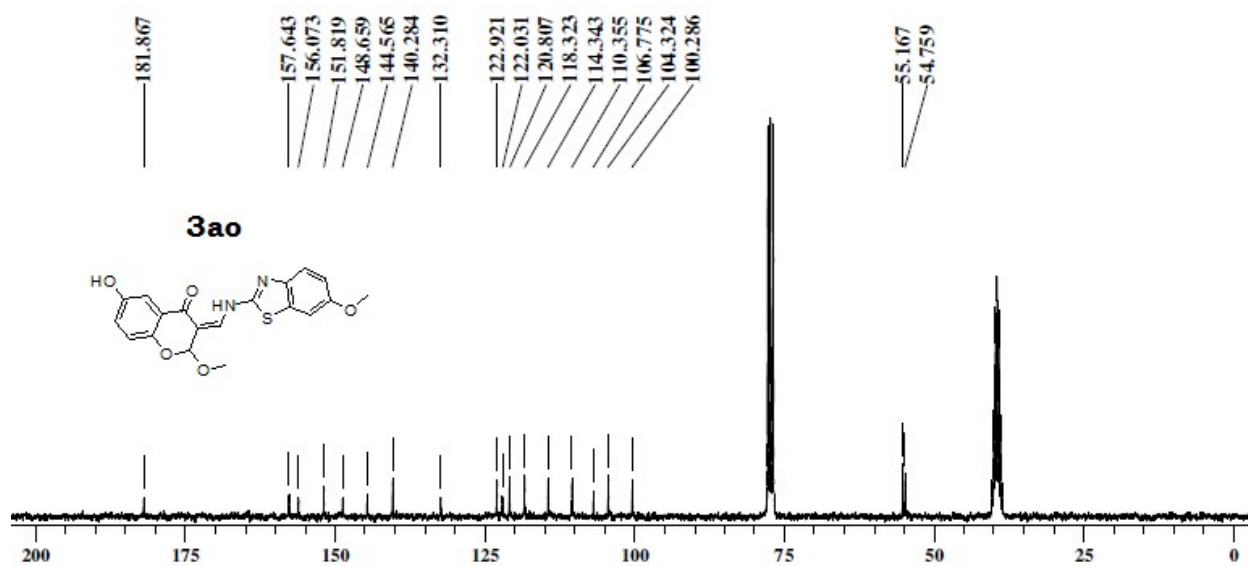

(Z)-8-bromo-6-chloro-3-((4-chlorobenzothiazol-2-ylamino)methylene)-2-methoxychroman-4-one  
(3ap):

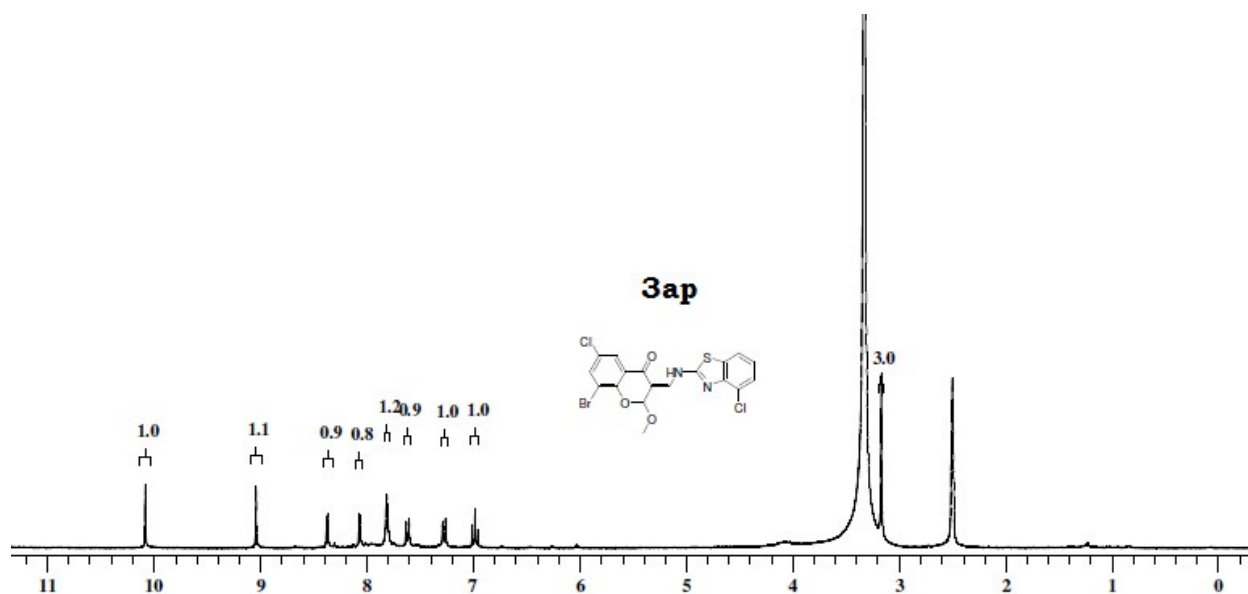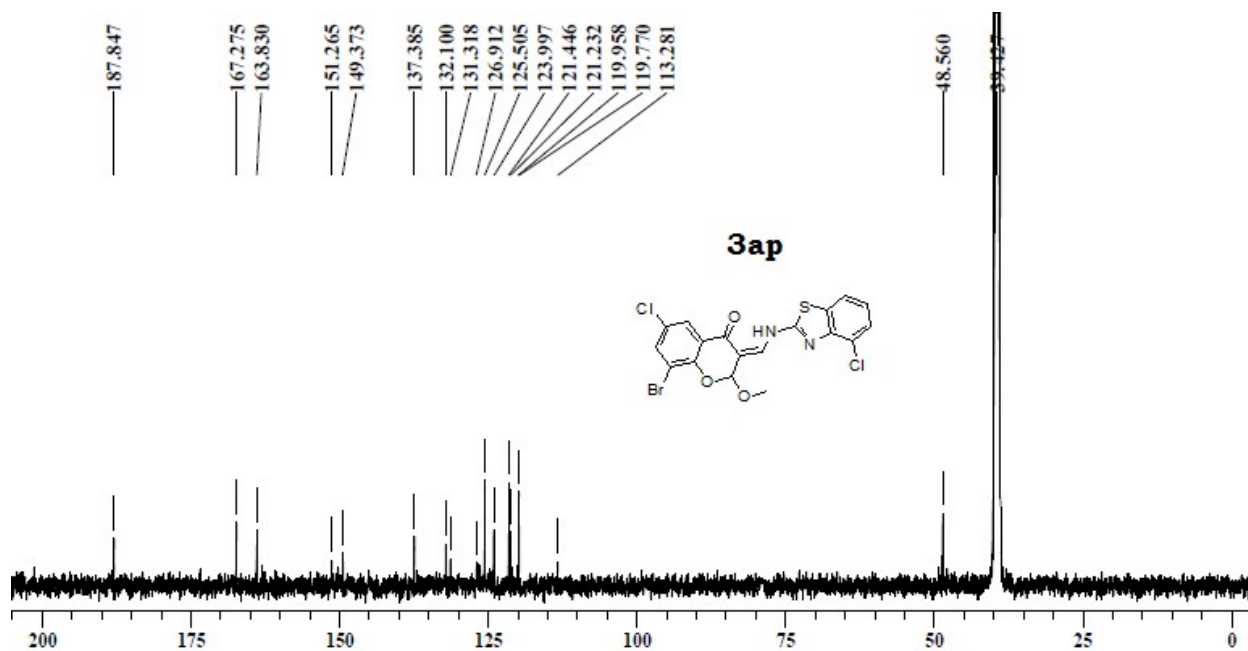

(Z)-3-((benzo[d]thiazol-2-ylamino)methylene)-2-ethoxychroman-4-one (**3aq**).

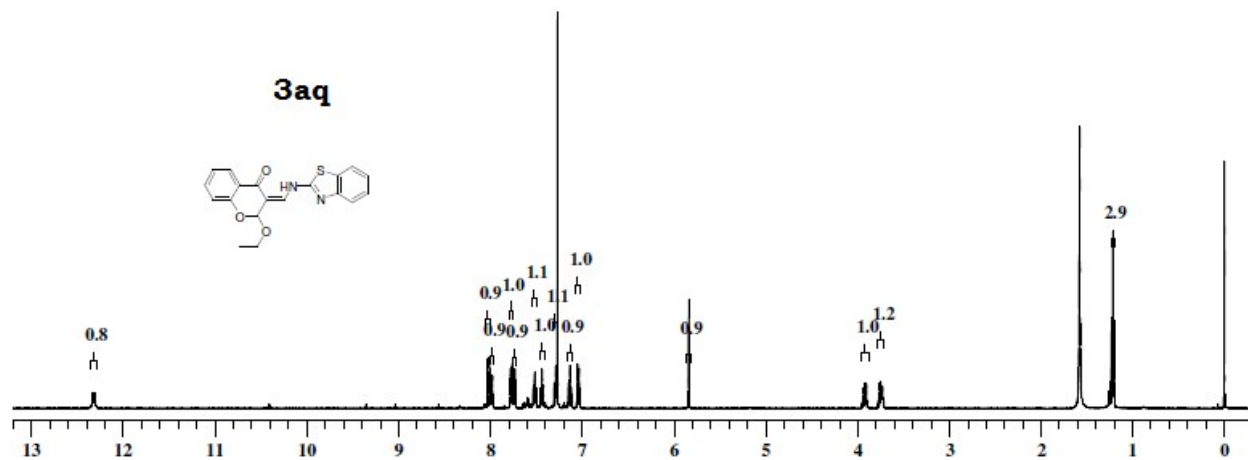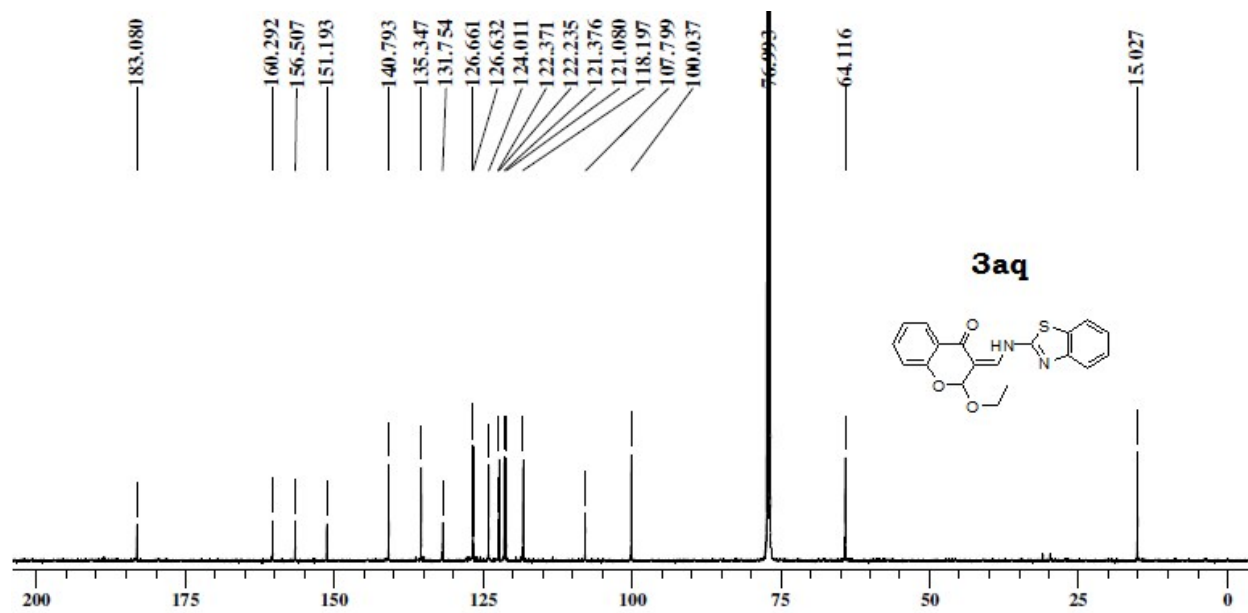

(Z)-2-methoxy-3-((6-methoxybenzo[d]thiazol-2-ylamino)methylene)chroman-4-one (**3ar**).

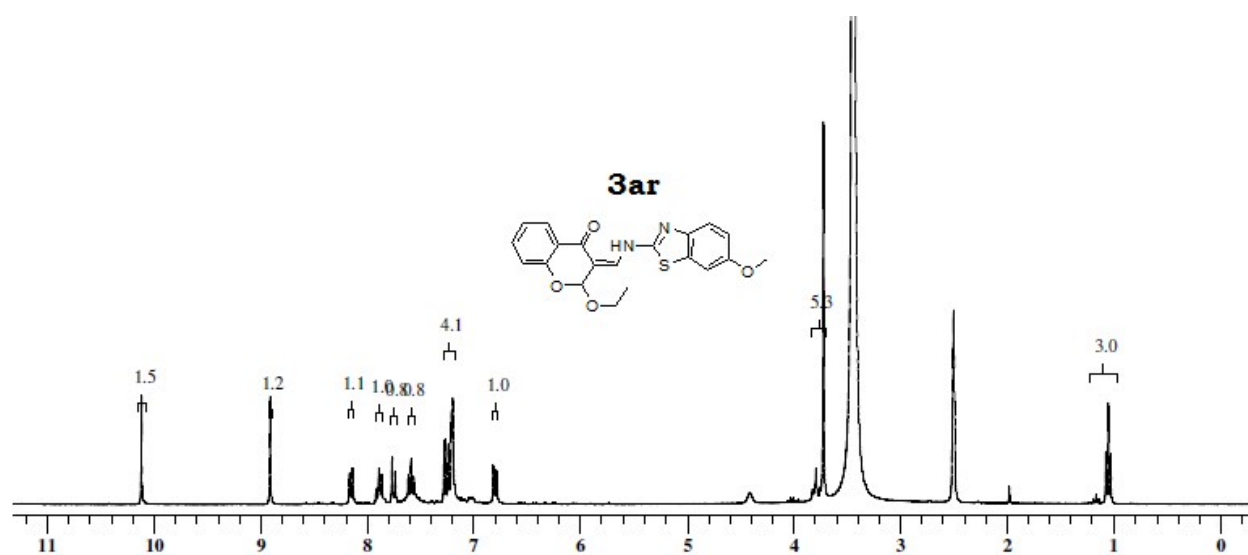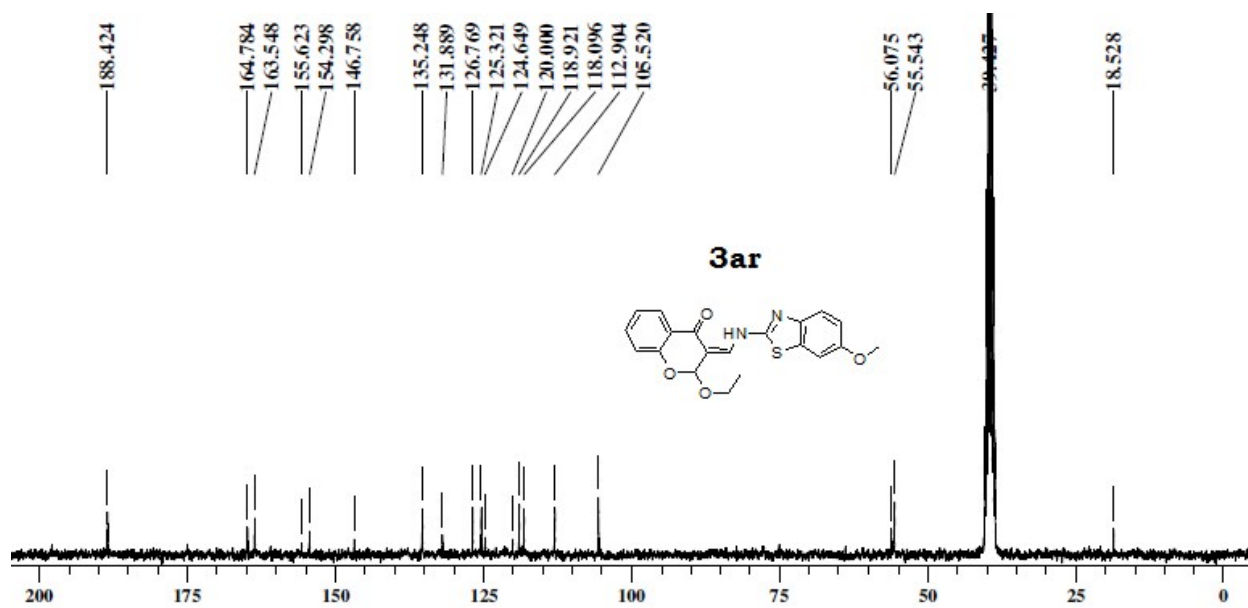



(Z)-6-bromo-2-ethoxy-3-((6-methylbenzo[d]thiazol-2-ylamino)methylene)chroman-4-one (**3at**):

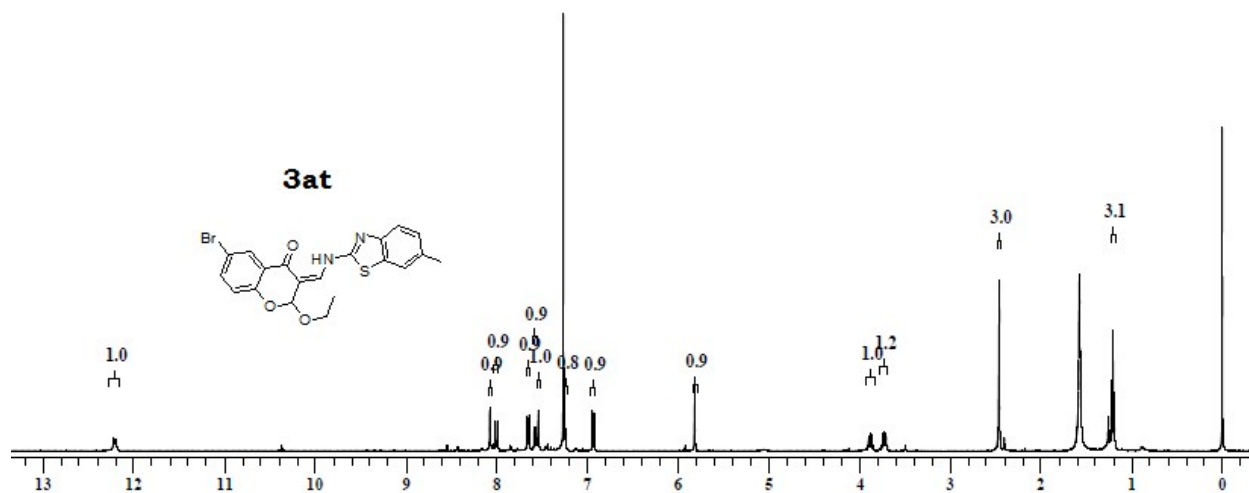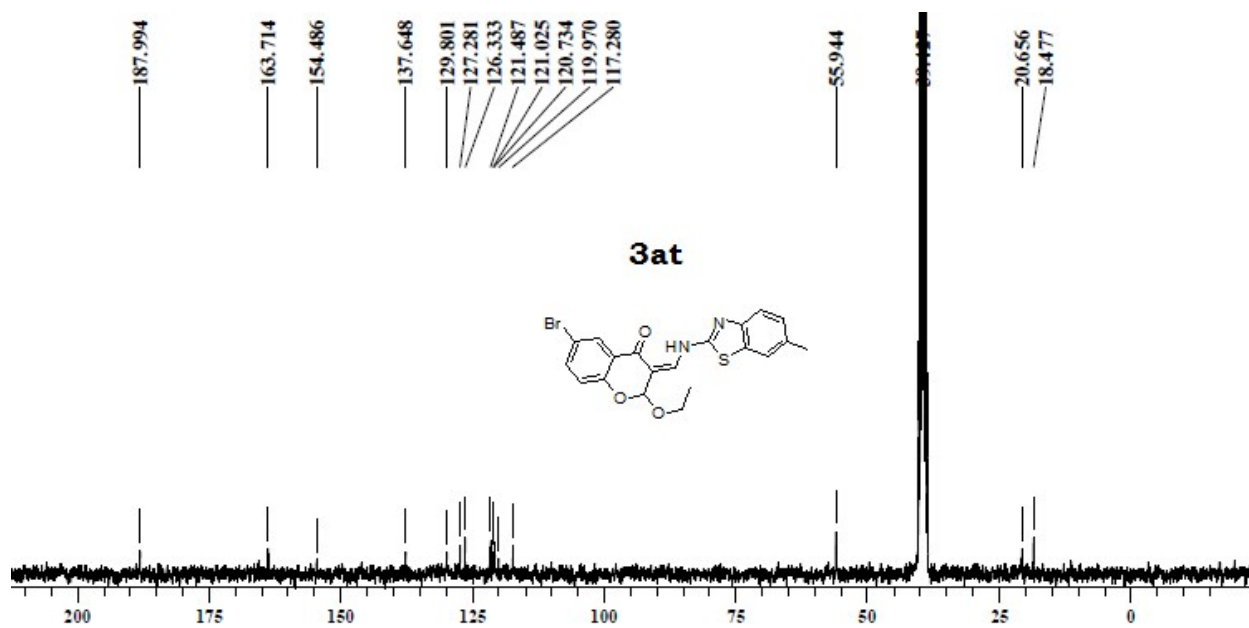





(Z)-2-butoxy-6-chloro-3-((4-chlorobenzothiazol-2-ylamino)methylene)chroman-4-one (**3av**):

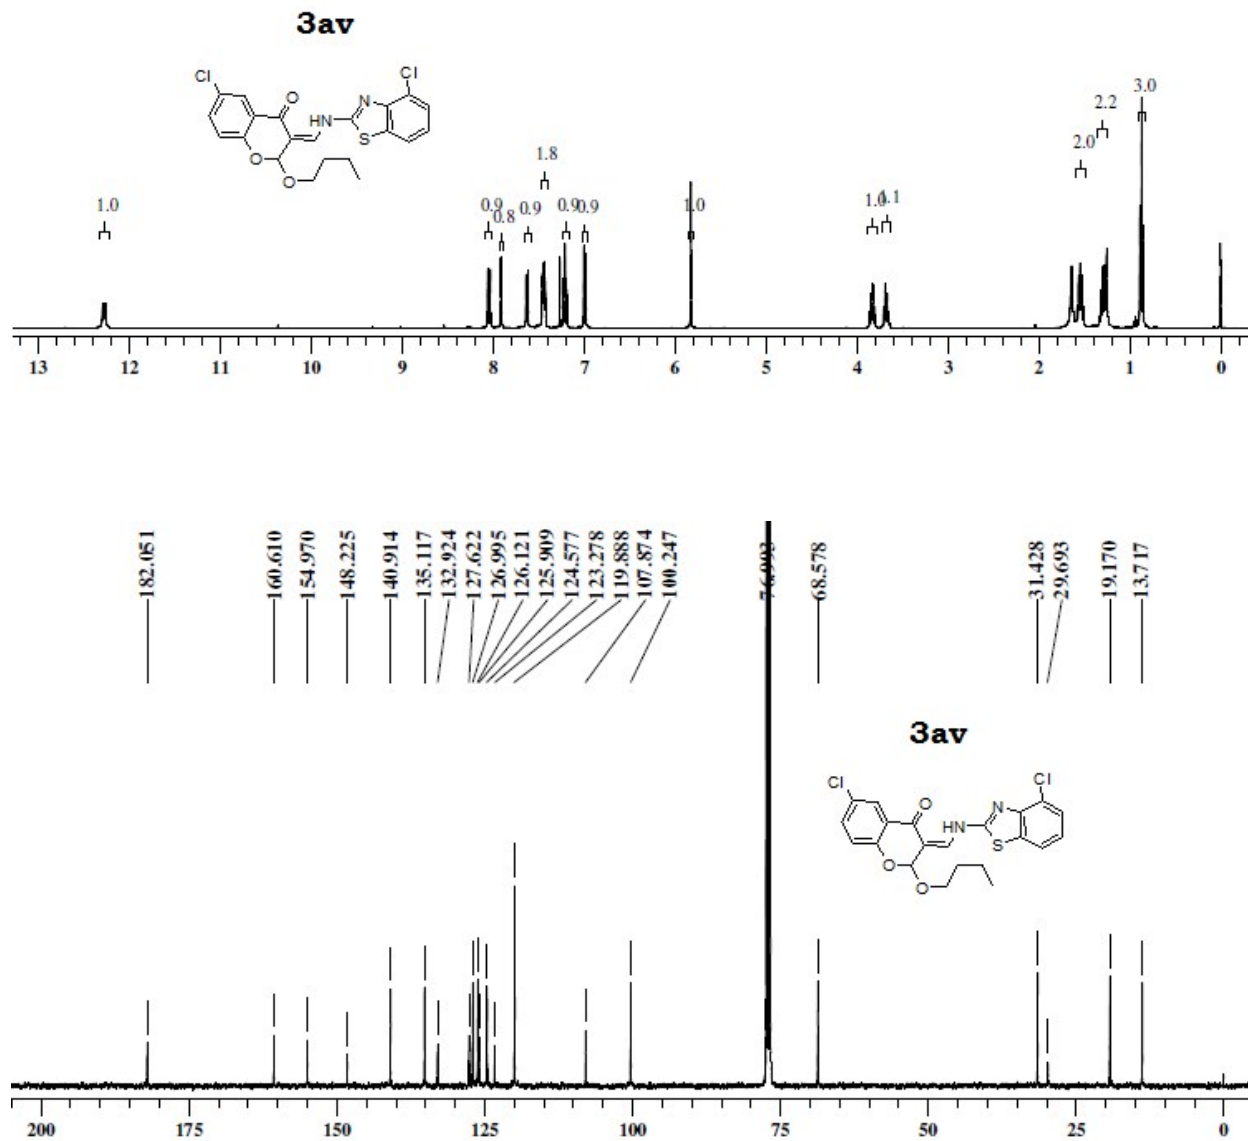

(Z)-2-butoxy-6-chloro-3-((6-methoxybenzo[d]thiazol-2-ylamino)methylene)chroman-4-one (**3aw**).

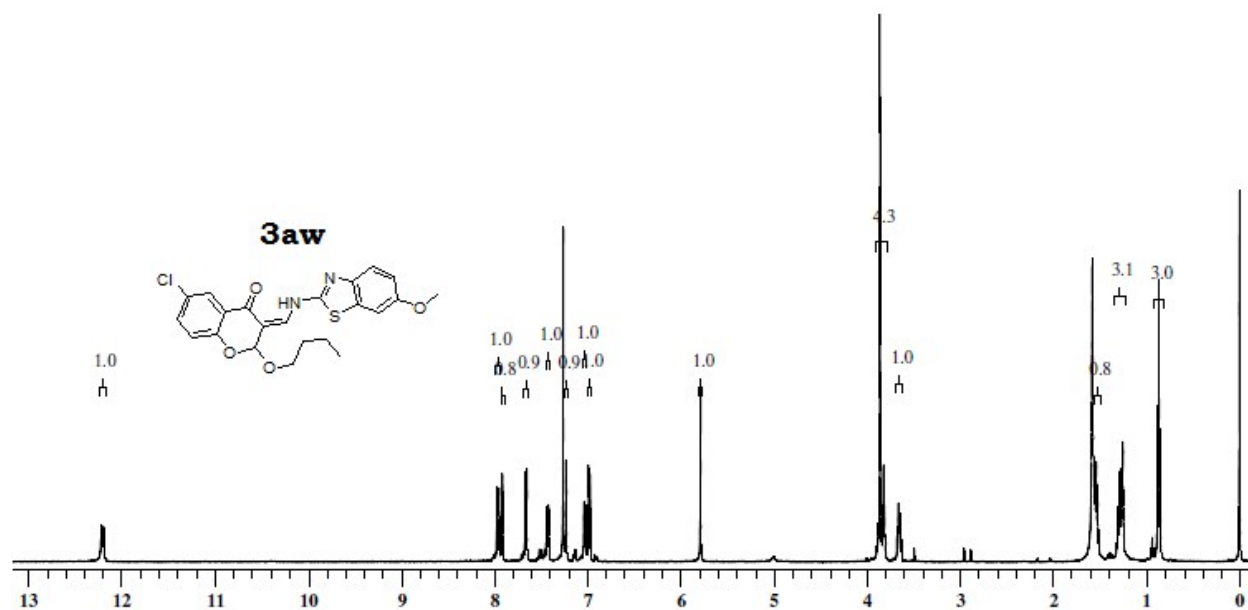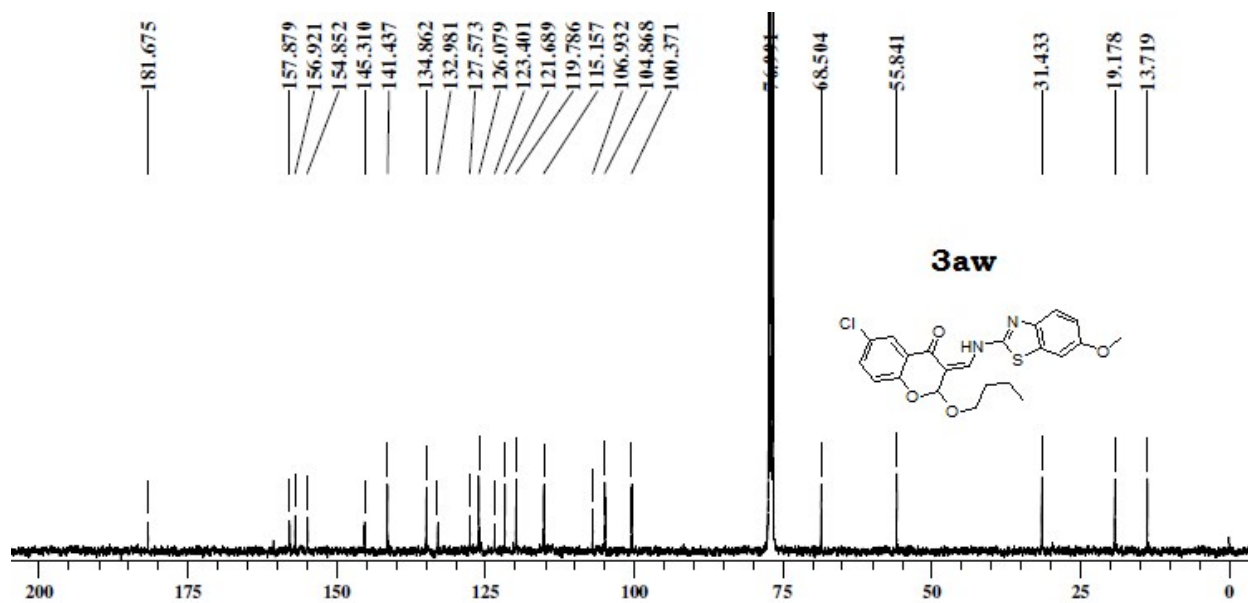

(Z)-6-chloro-3-((4-chlorobenzo[d]thiazol-2-ylamino)methylene)-2-(hexyloxy)chroman-4-one (**3ax**):

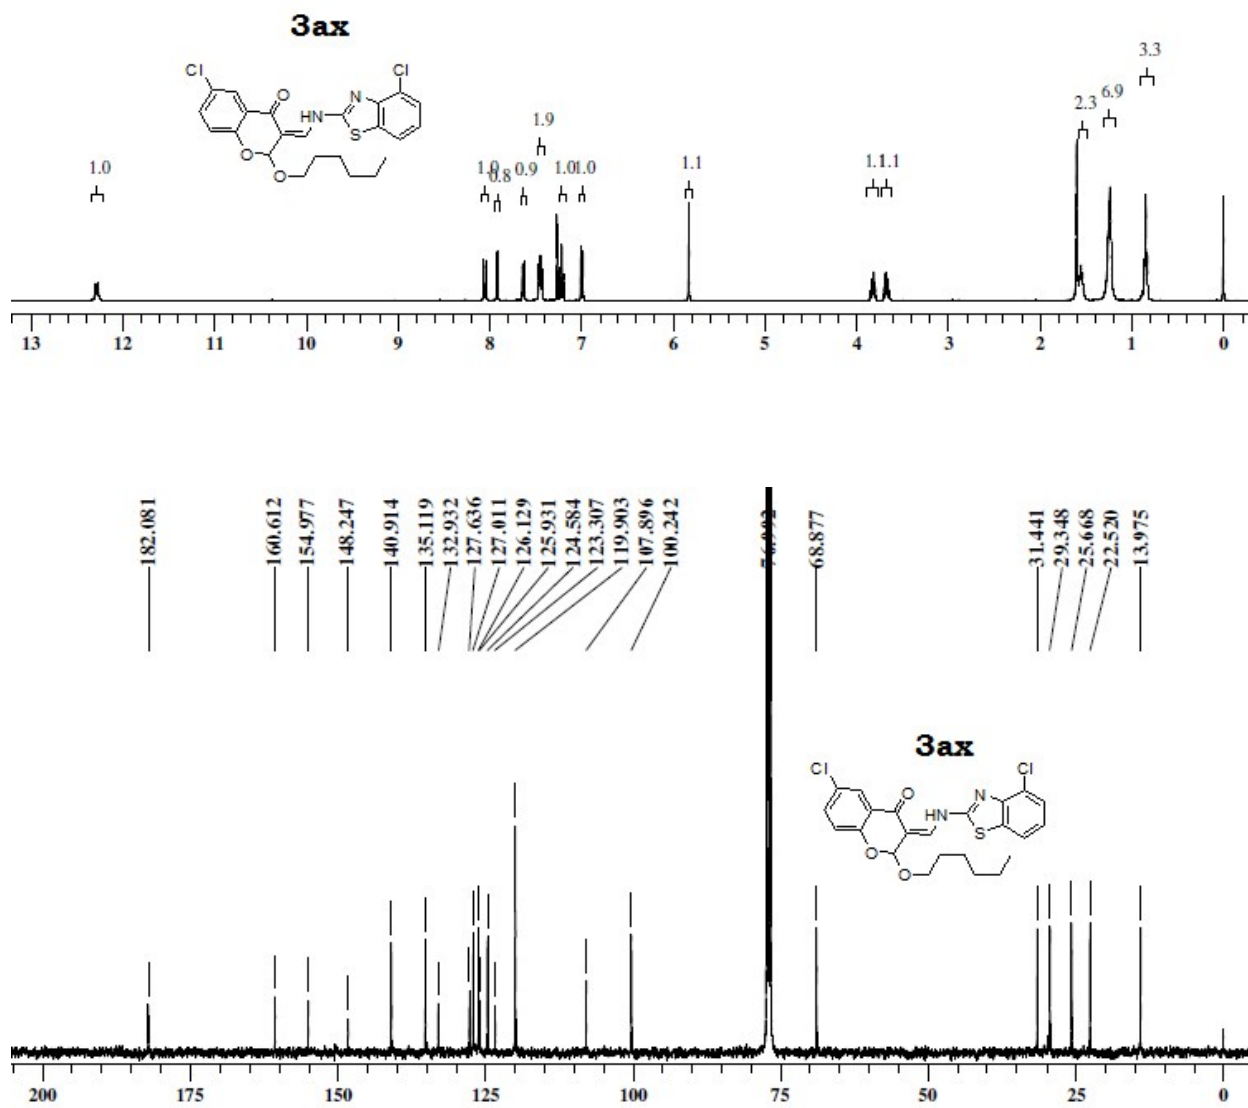

(Z)-6-chloro-3-((4-chlorobenzothiazol-2-ylamino)methylene)-2-(heptyloxy)chroman-4-one (**3ay**):

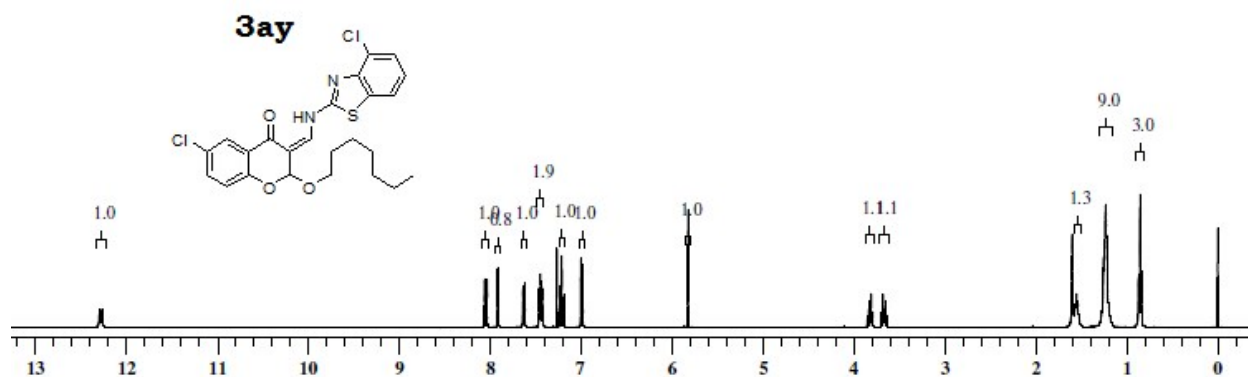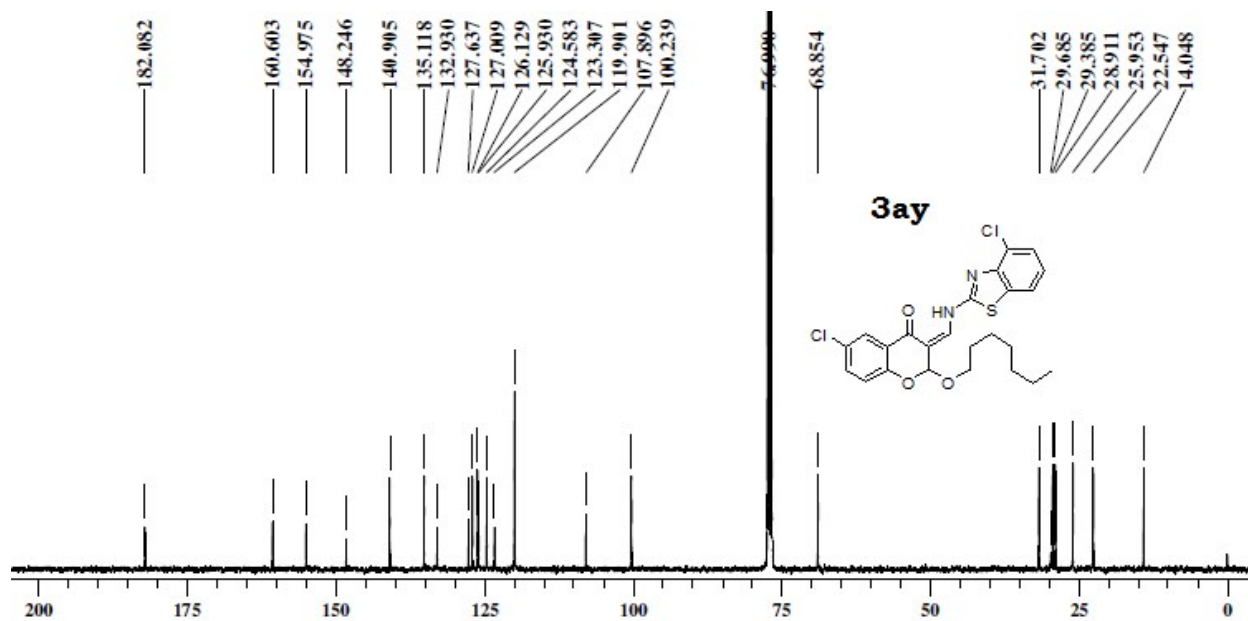

(Z)-6-chloro-3-((4-chlorobenzo[d]thiazol-2-ylamino)methylene)-2-(octyloxy)chroman-4-one (**3az**):

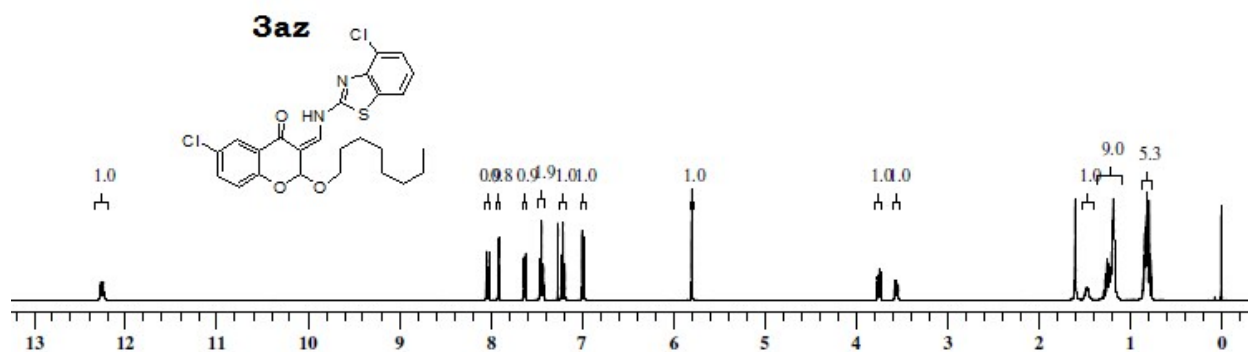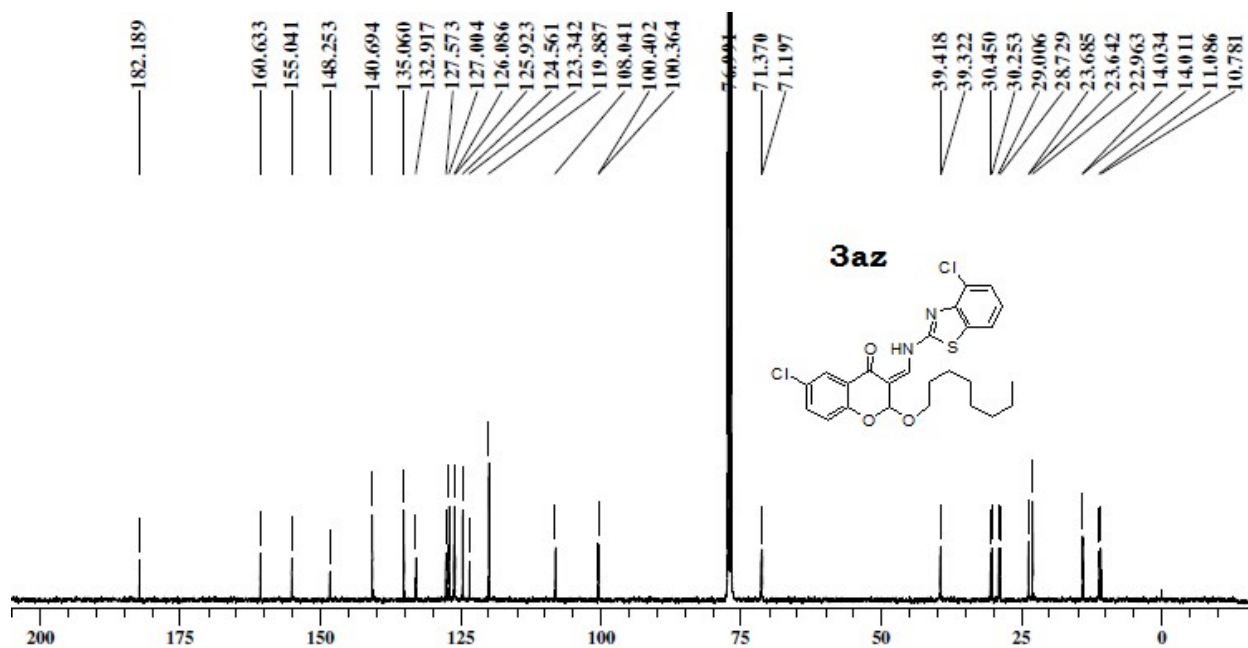

(Z)-3-((4-chlorobenzothiazol-2-ylamino)methylene)-2-isobutoxychroman-4-one (**3ba**):

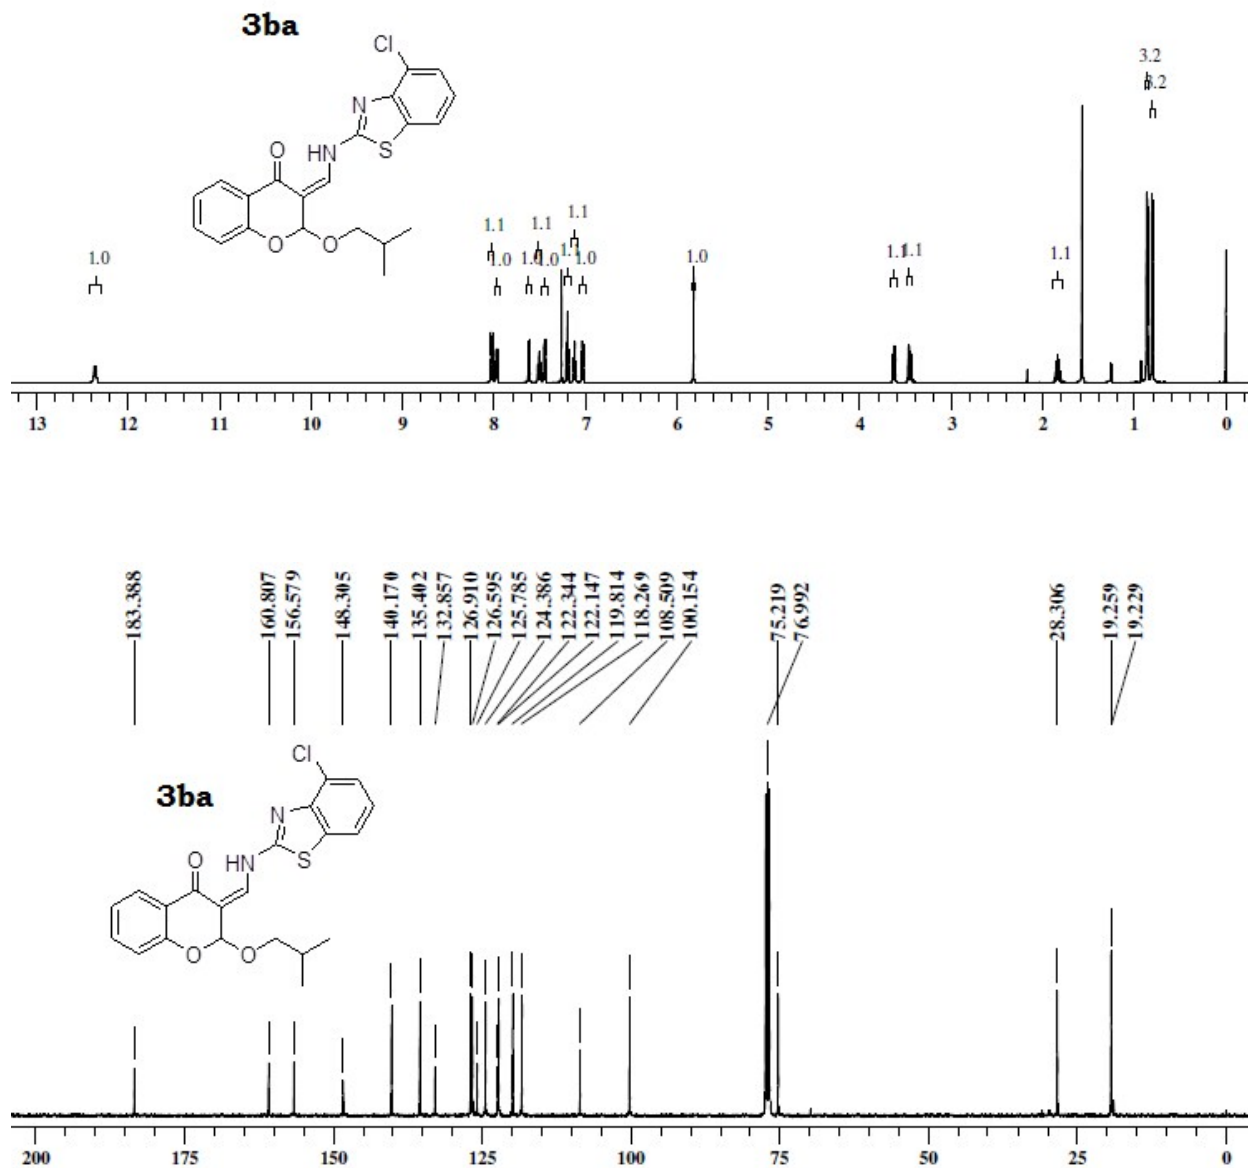

(Z)-6-chloro-3-((4-chlorobenzothiazol-2-ylamino)methylene)-2-isobutoxychroman-4-one (**3bb**):

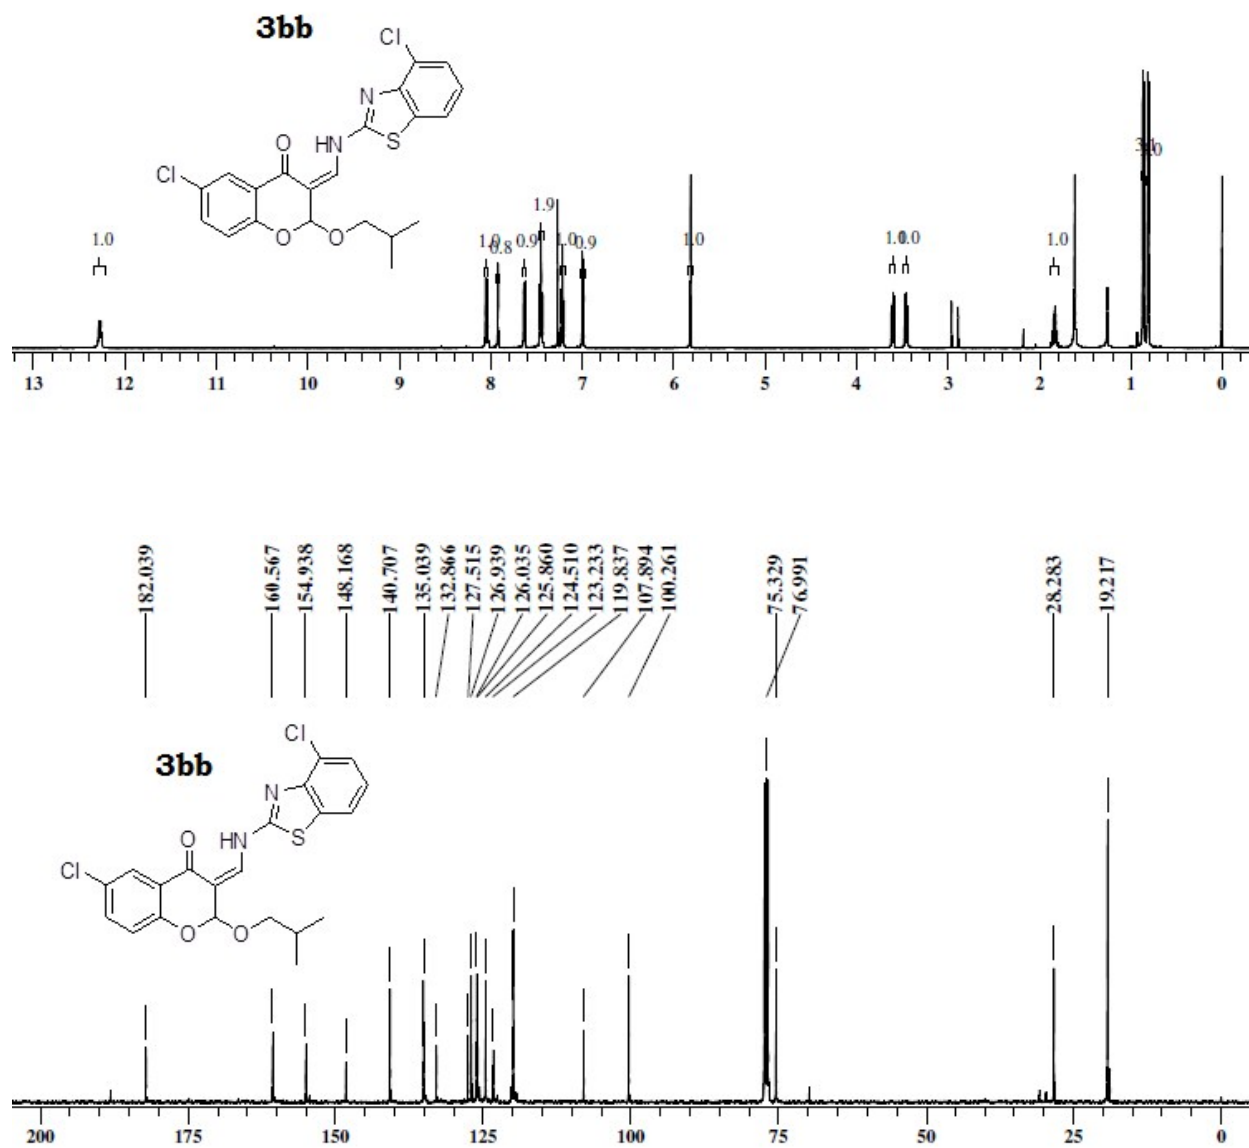



(Z)-3-((benzo[d]thiazol-2-ylamino)methylene)-6-chloro-2-(2-hydroxyethoxy)chroman-4-one (**3bc**):

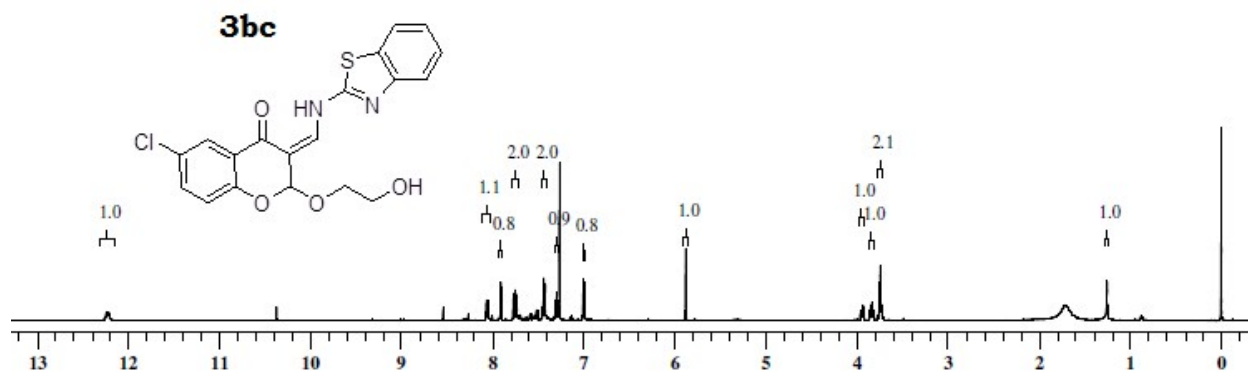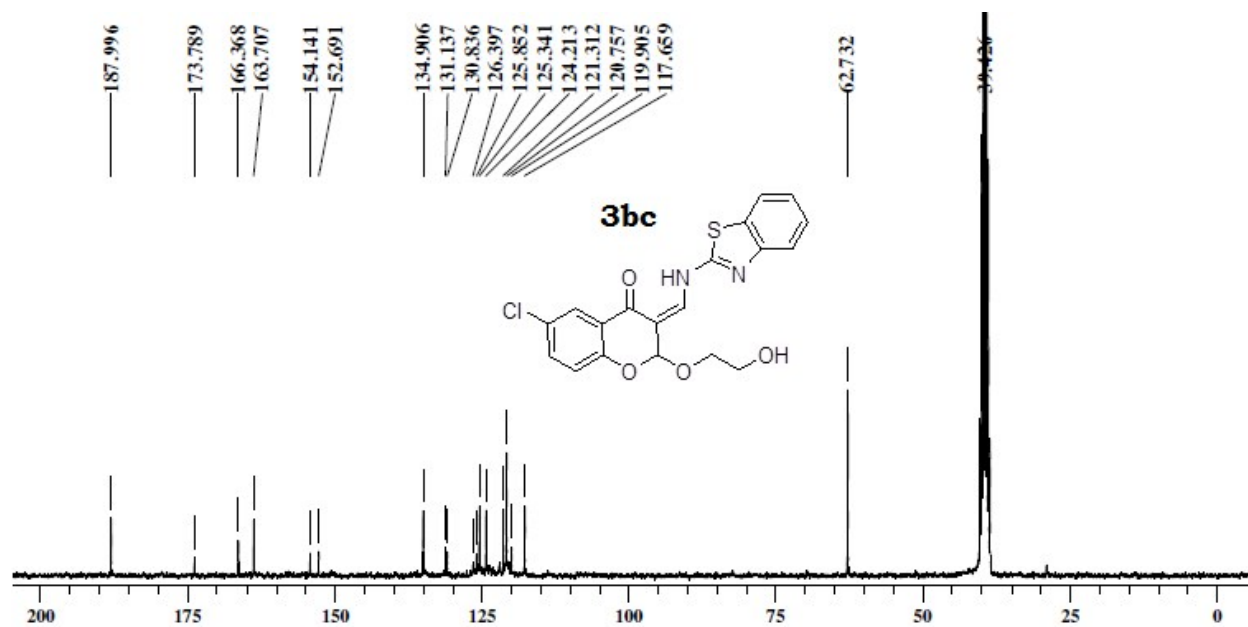

(Z)-6-chloro-3-((4-chlorobenzo[d]thiazol-2-ylamino)methylene)-2-(5-hydroxypentyloxy)chroman-4-one  
**(3bd)**:

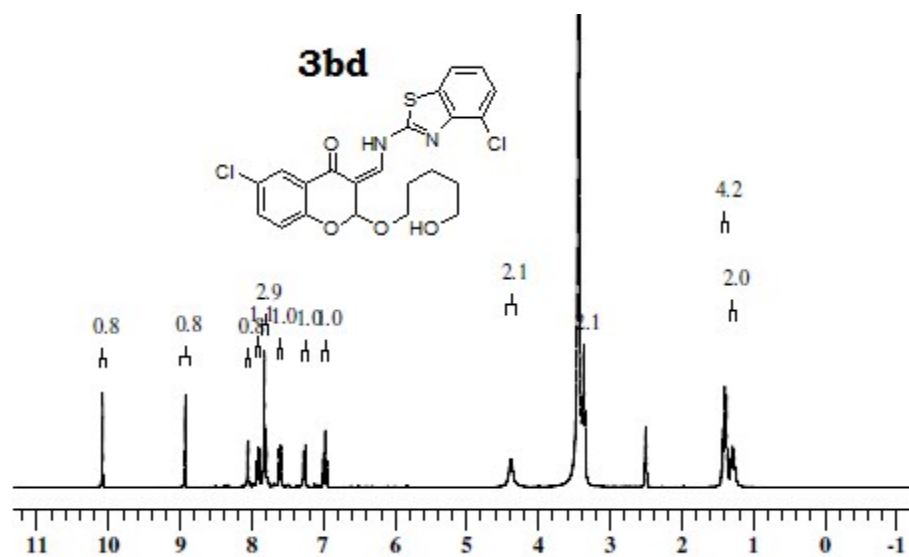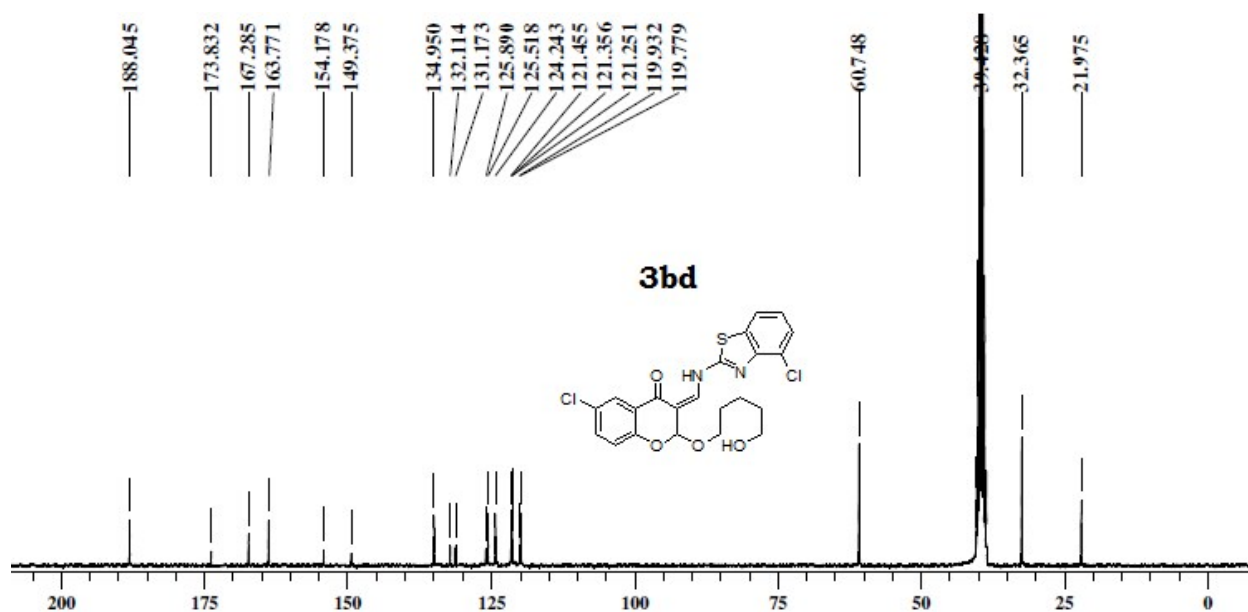

3-(sec-butoxy(4-chlorobenzo[d]thiazol-2-ylamino)methyl)-6-chloro-4H-chromen-4-one (**3be**):

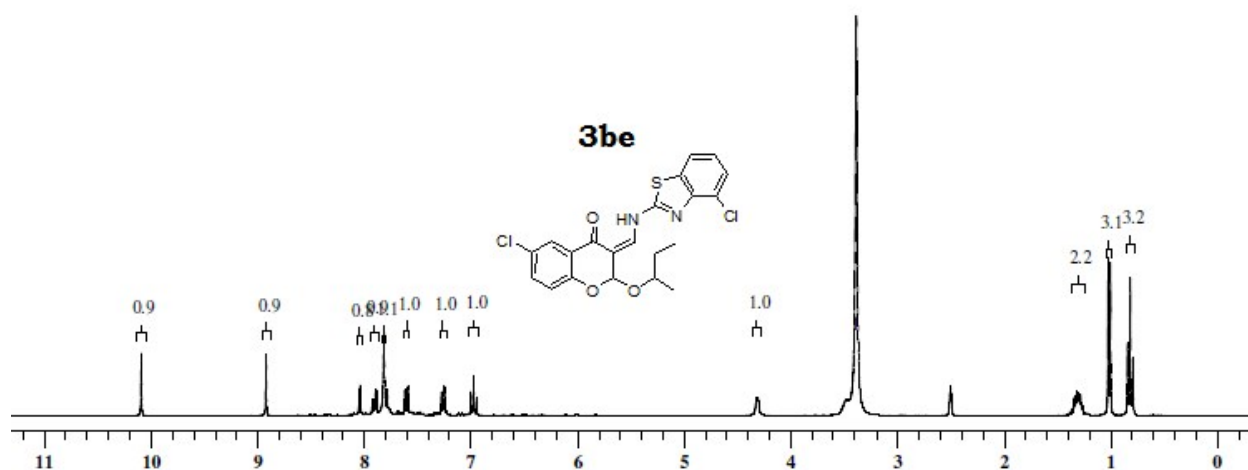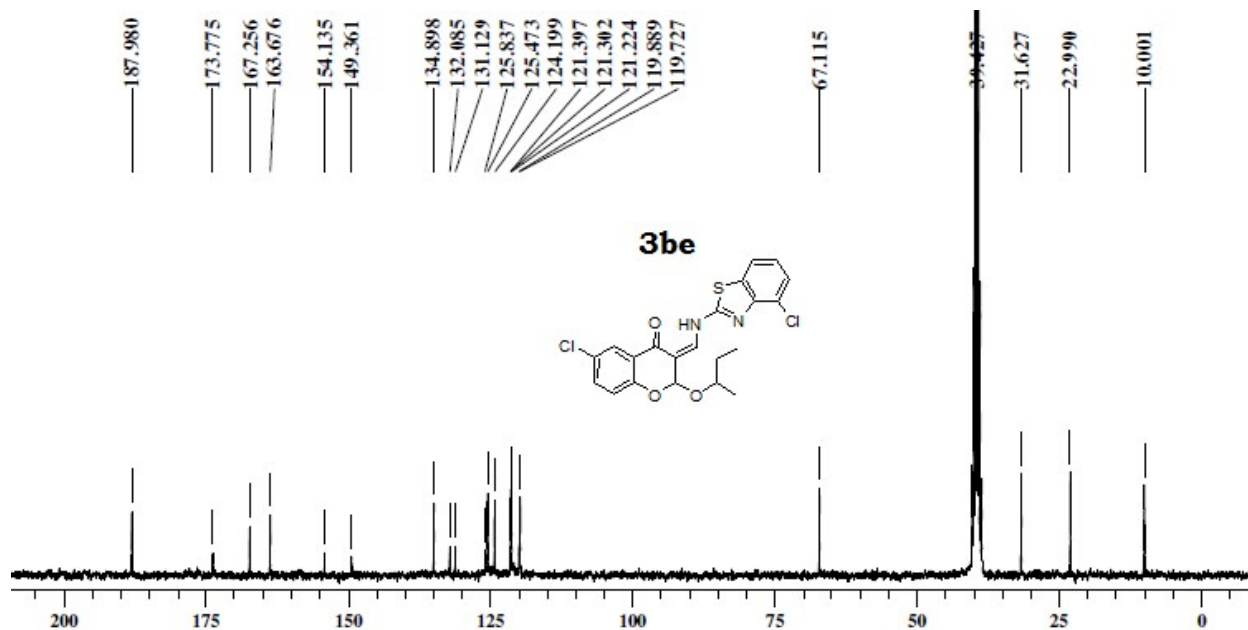

(Z)-2-sec-butoxy-3-((4-chlorophenyl)thiazol-2-ylamino)methylene)chroman-4-one (**3bf**):

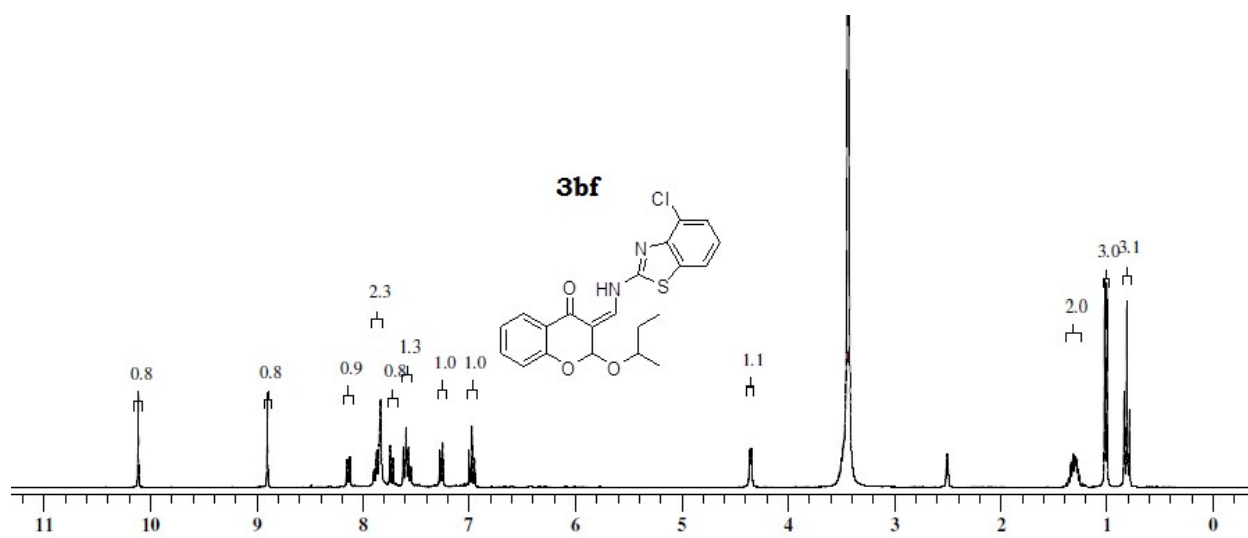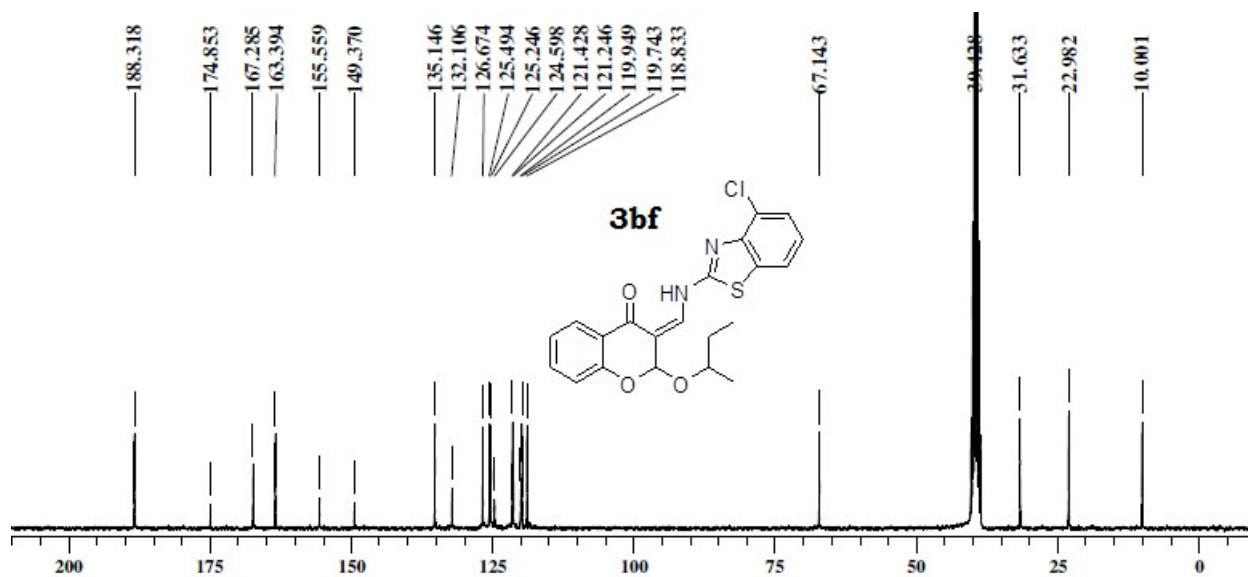



(Z)-6-chloro-3-((4-chlorophenylamino)methylene)-2-methoxychroman-4-one (**3bh**):

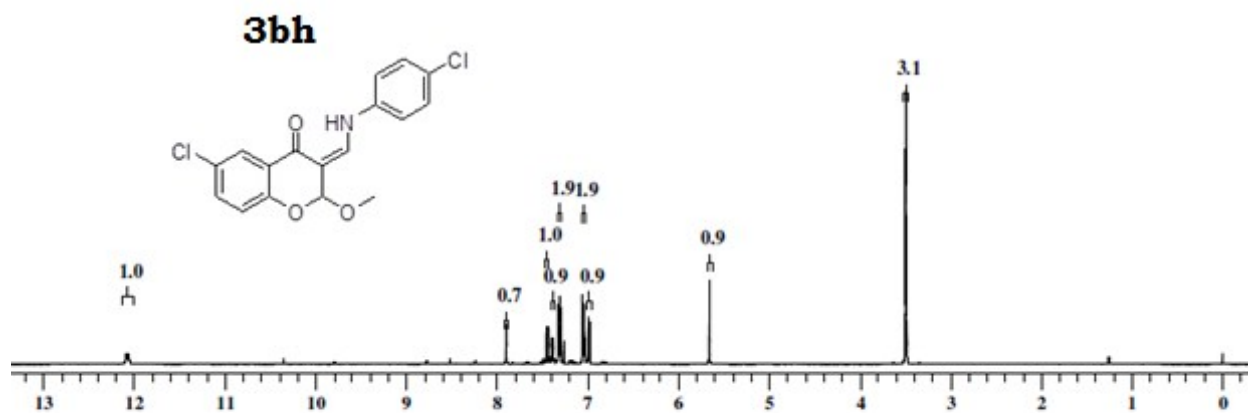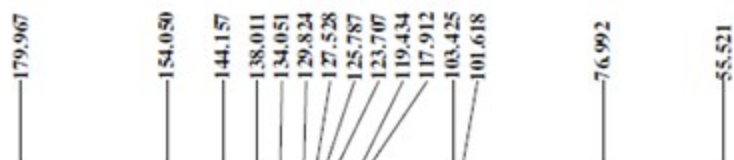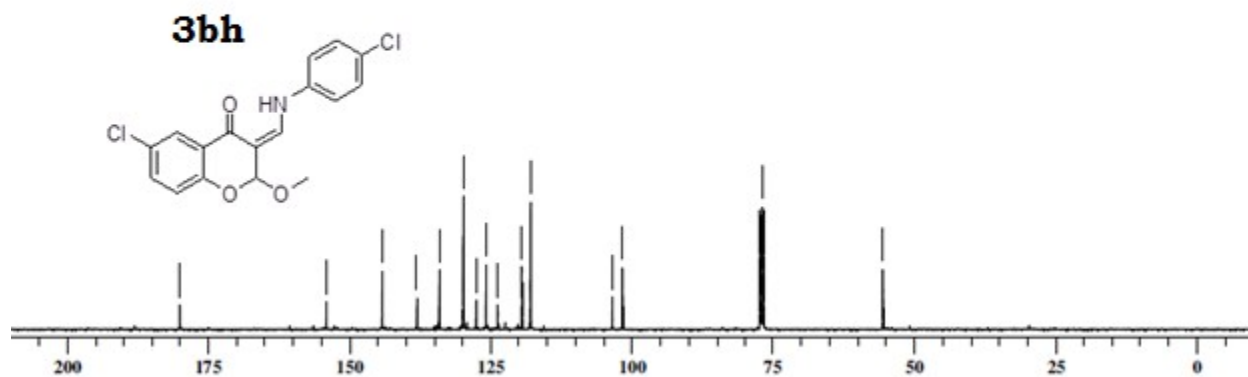

(Z)-6-chloro-3-((6-methoxybenzo[d]thiazol-2-ylamino)methylene)-2-(octyloxy)chroman-4-one (**3bi**):

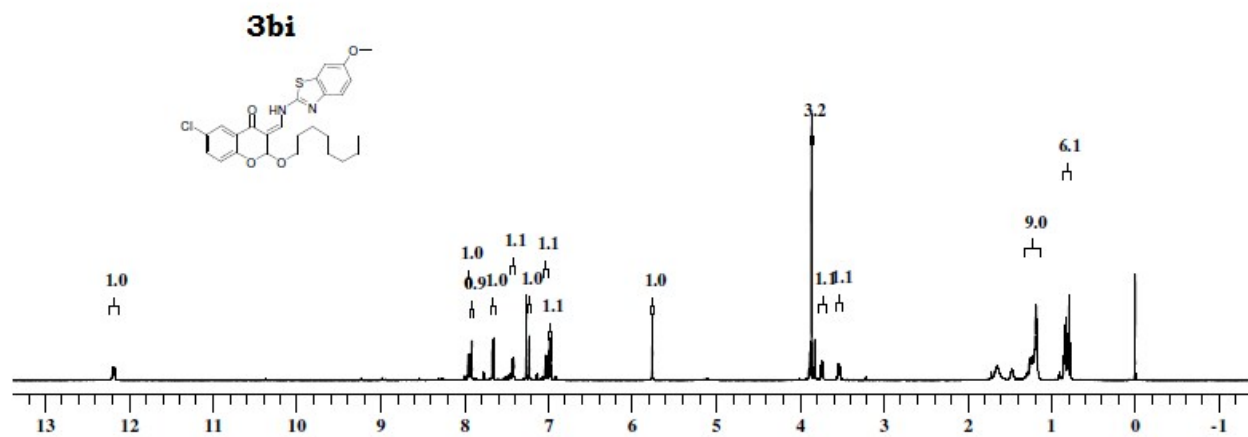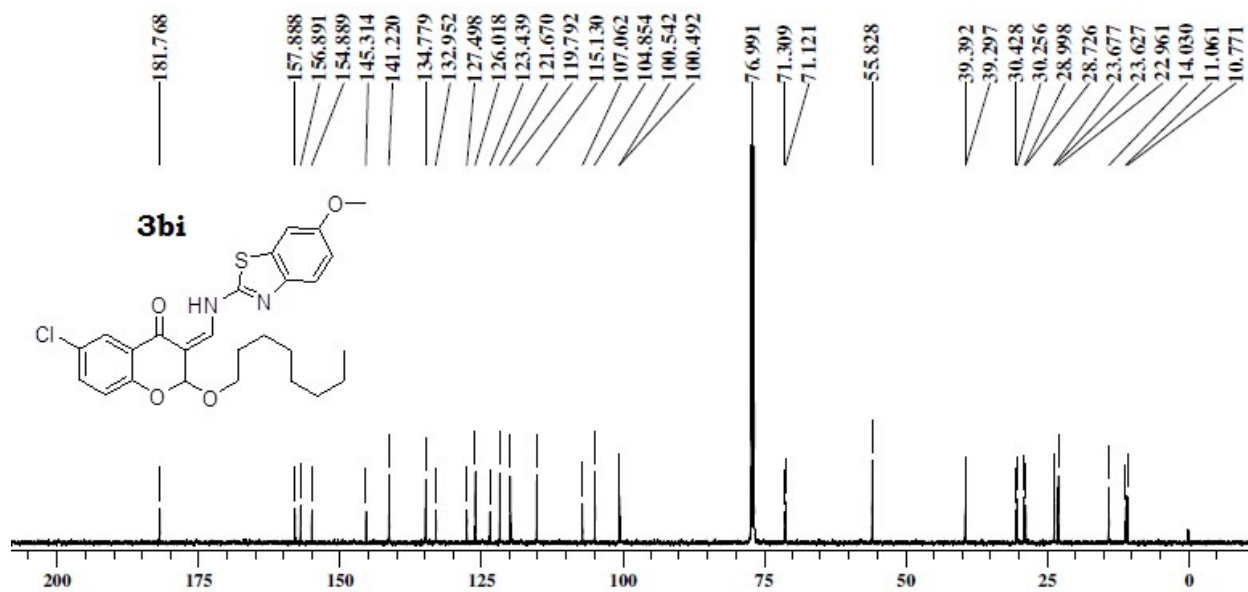

(Z)-6-chloro-3-((4-chlorobenzo[d]thiazol-2-ylamino)methylene)-2-((E)-3,7-dimethylocta-2,6-dienyloxy)chroman-4-one (**3bj**):

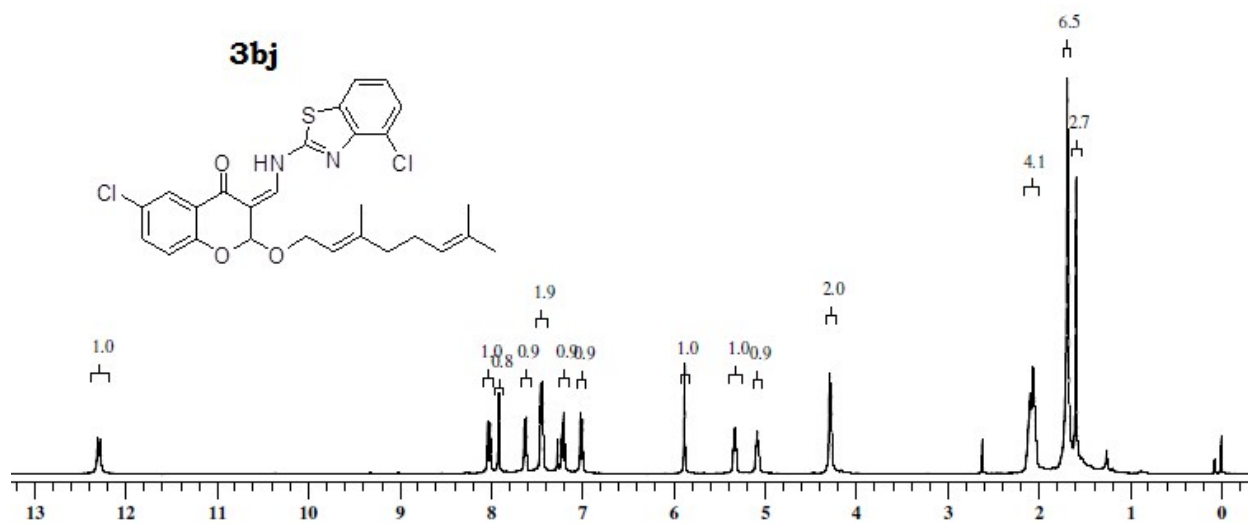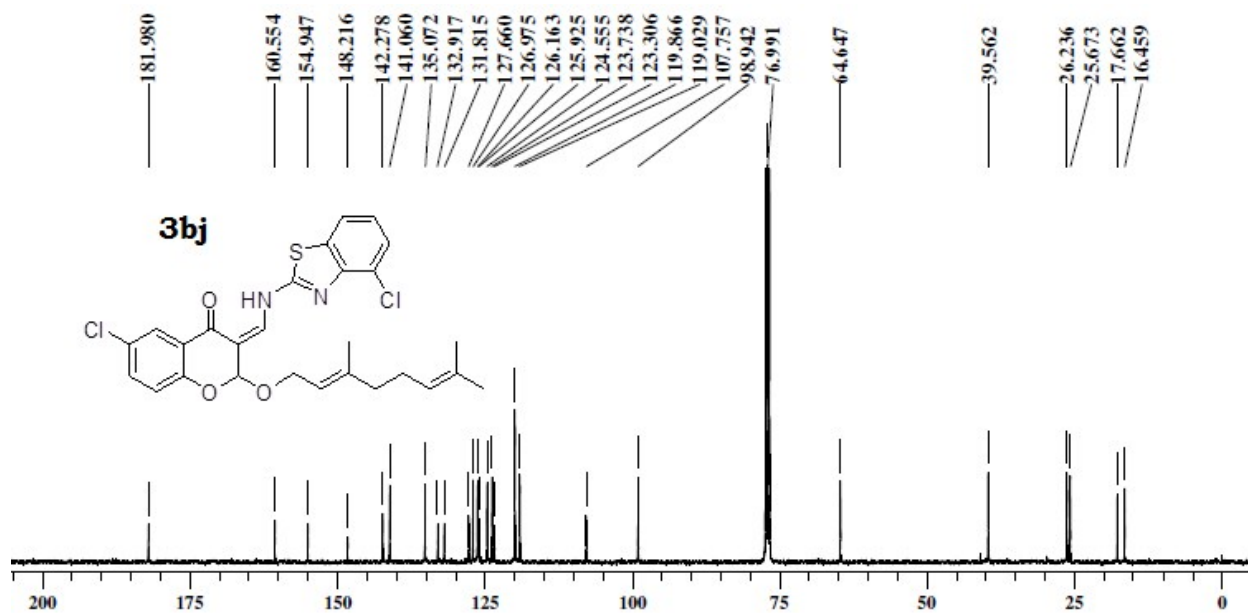





3-((benzo[d]thiazol-2-ylimino)methyl)-4H-chromen-4-one (**4a**).

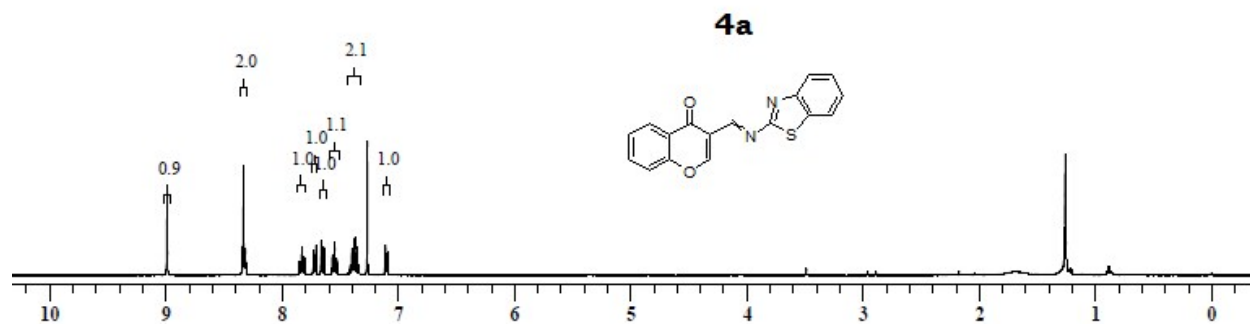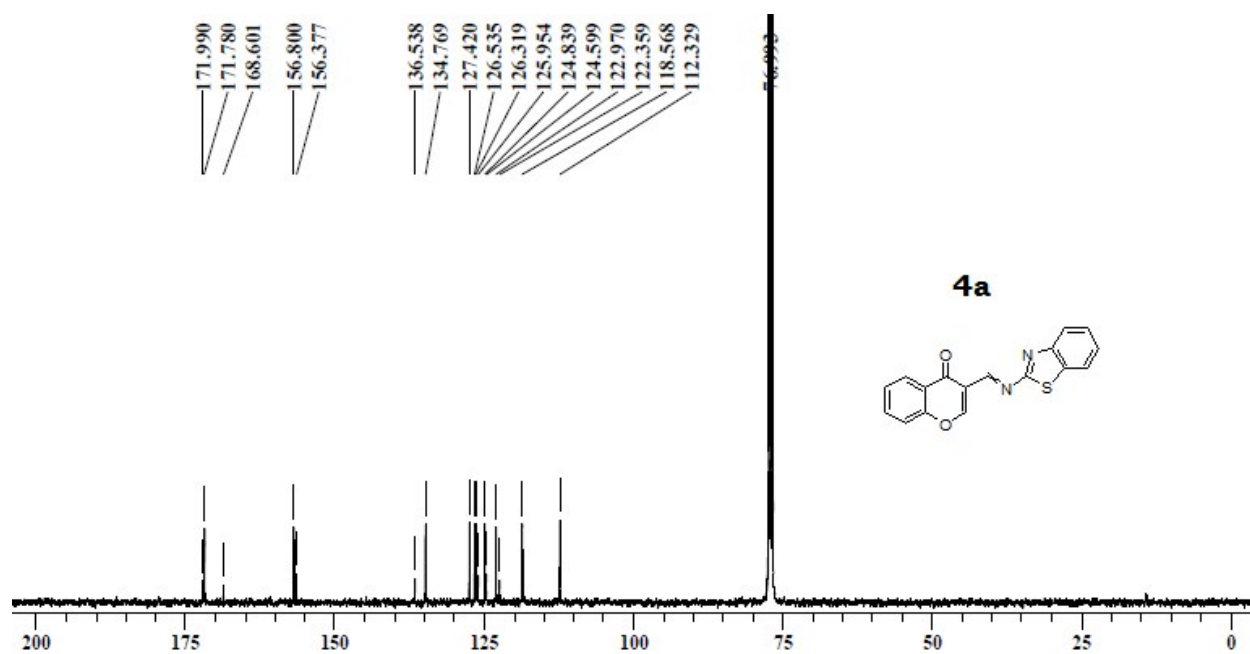

3-((6-methylbenzo[d]thiazol-2-ylimino)methyl)-4H-chromen-4-one (**4b**):

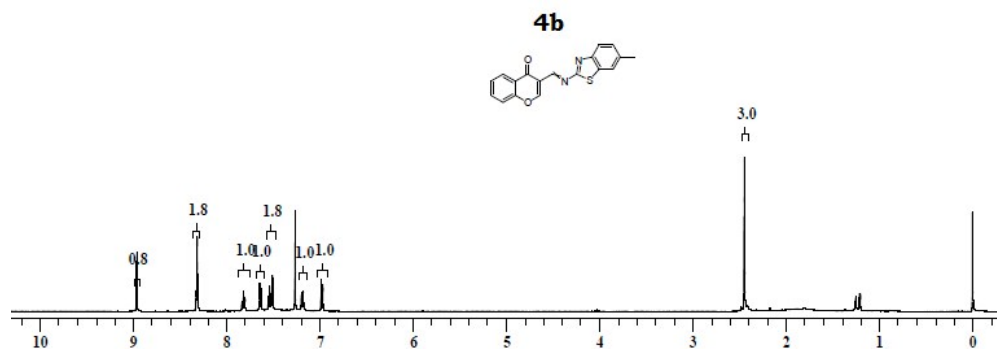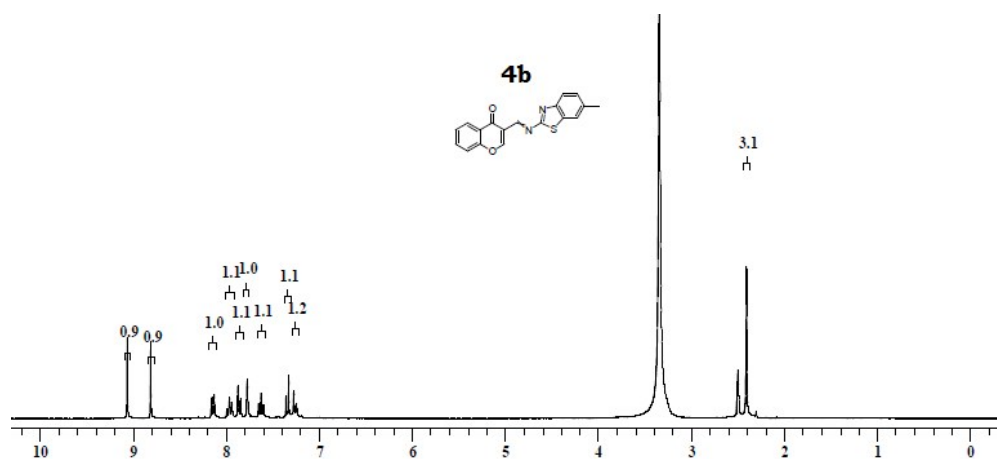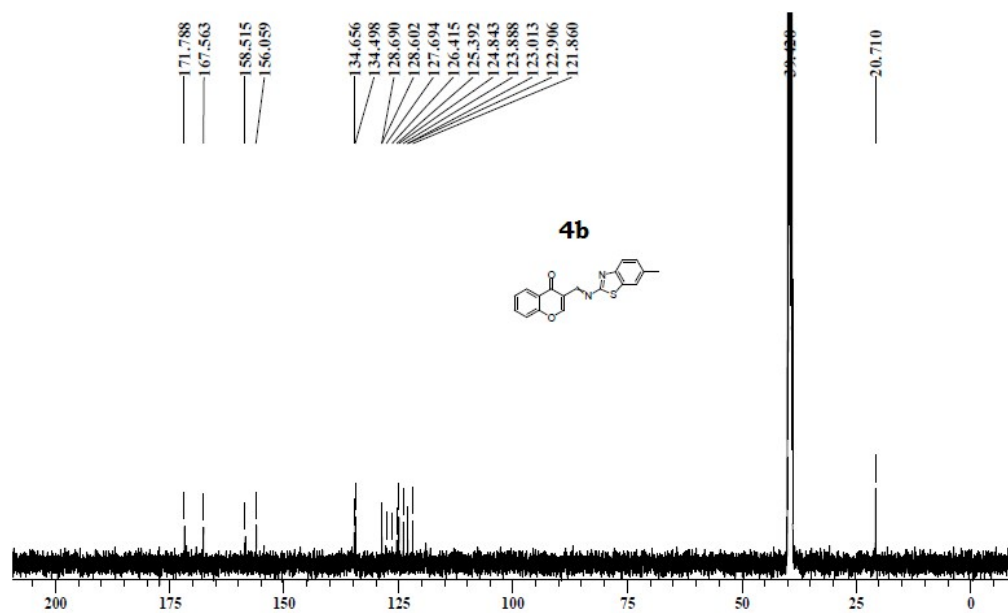

3-((benzo[d]thiazol-2-ylimino)methyl)-6-chloro-4H-chromen-4-one (**4c**):

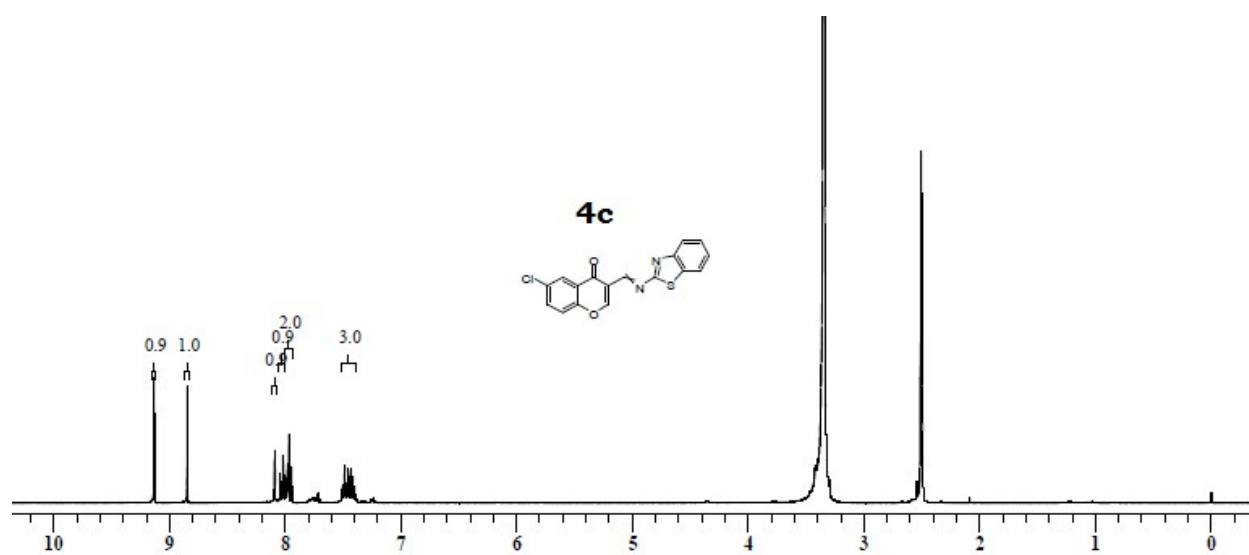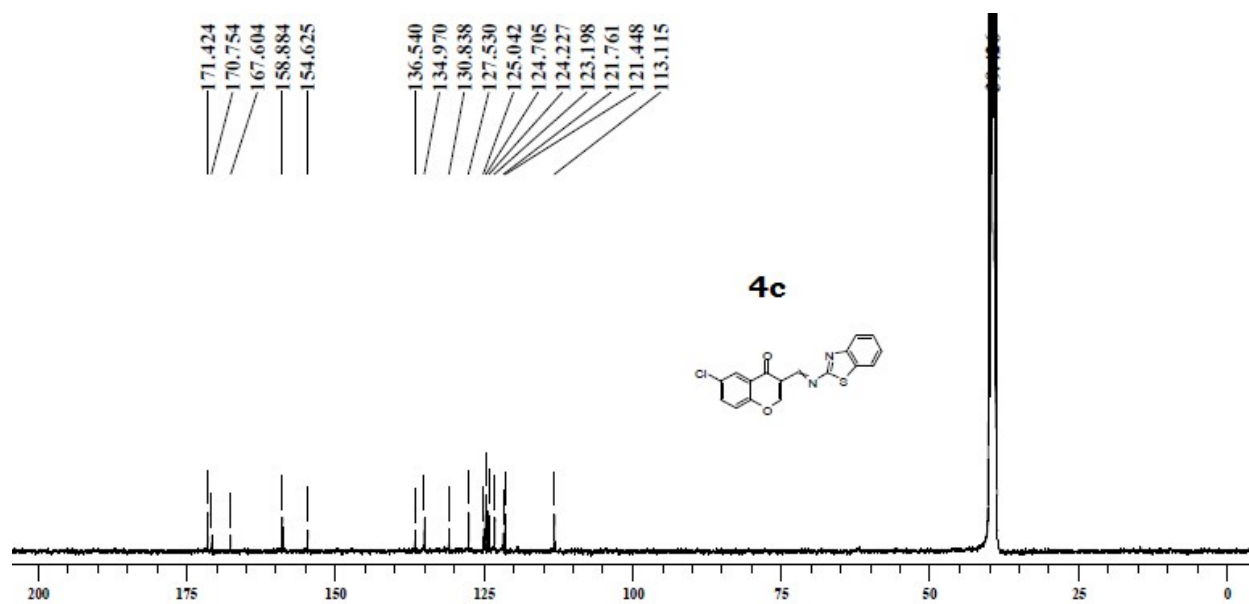

3-((benzo[d]thiazol-2-ylimino)methyl)-6-bromo-4H-chromen-4-one (**4d**):

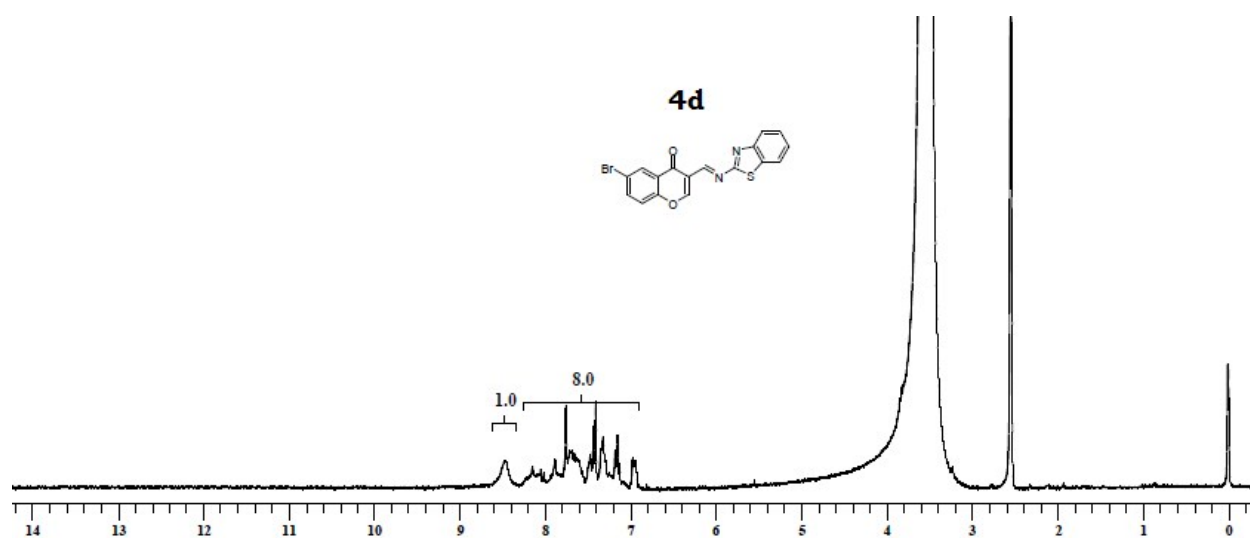

3-((benzo[d]thiazol-2-ylimino)methyl)-6-hydroxy-4H-chromen-4-one (**4e**):

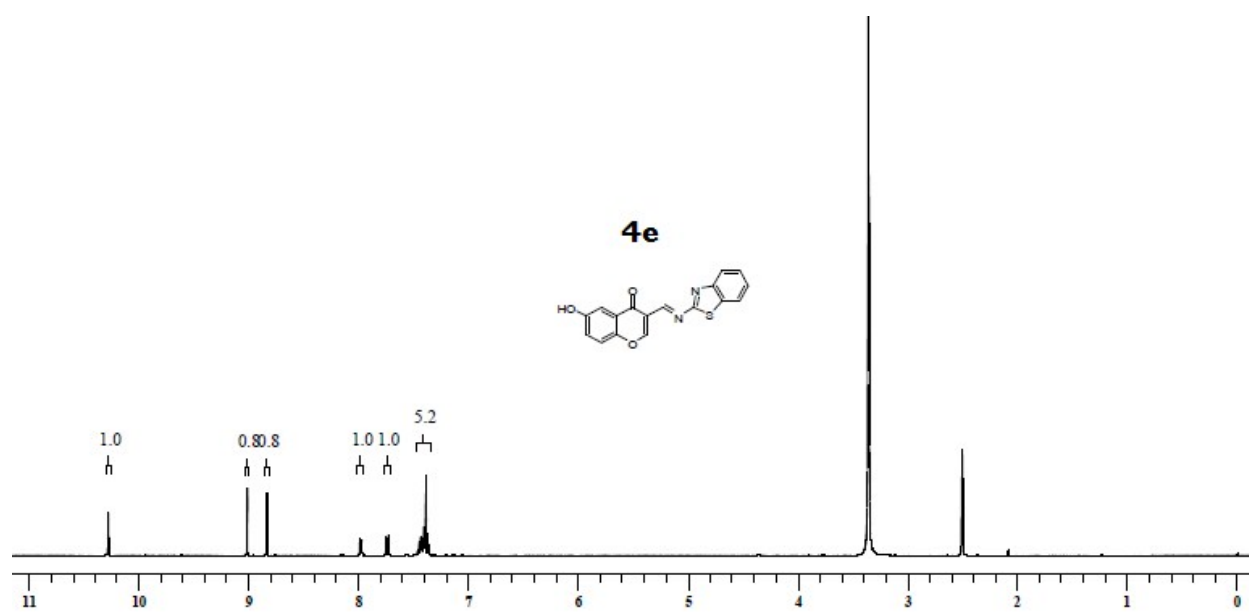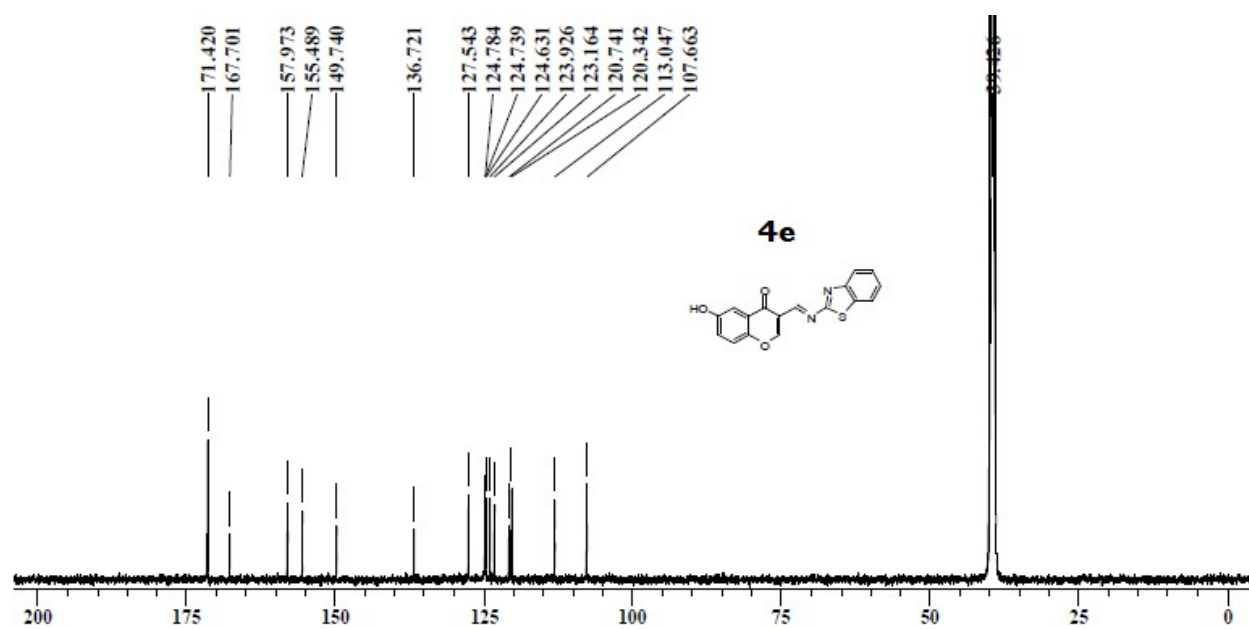

6-chloro-3-((6-methoxybenzo[d]thiazol-2-ylimino)methyl)-4H-chromen-4-one (**4f**):

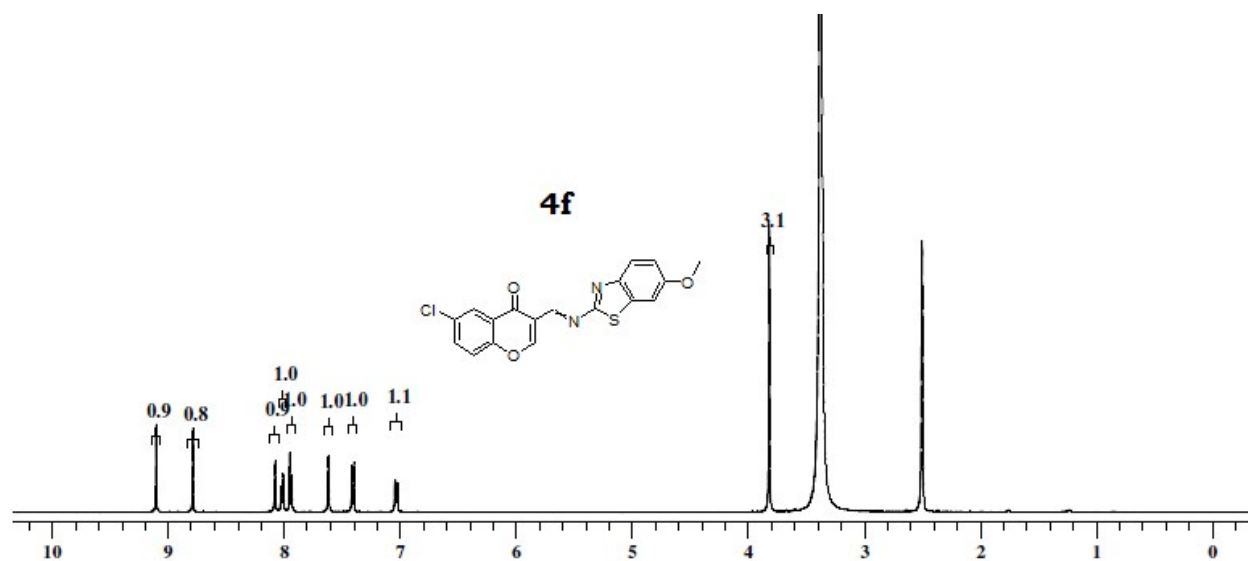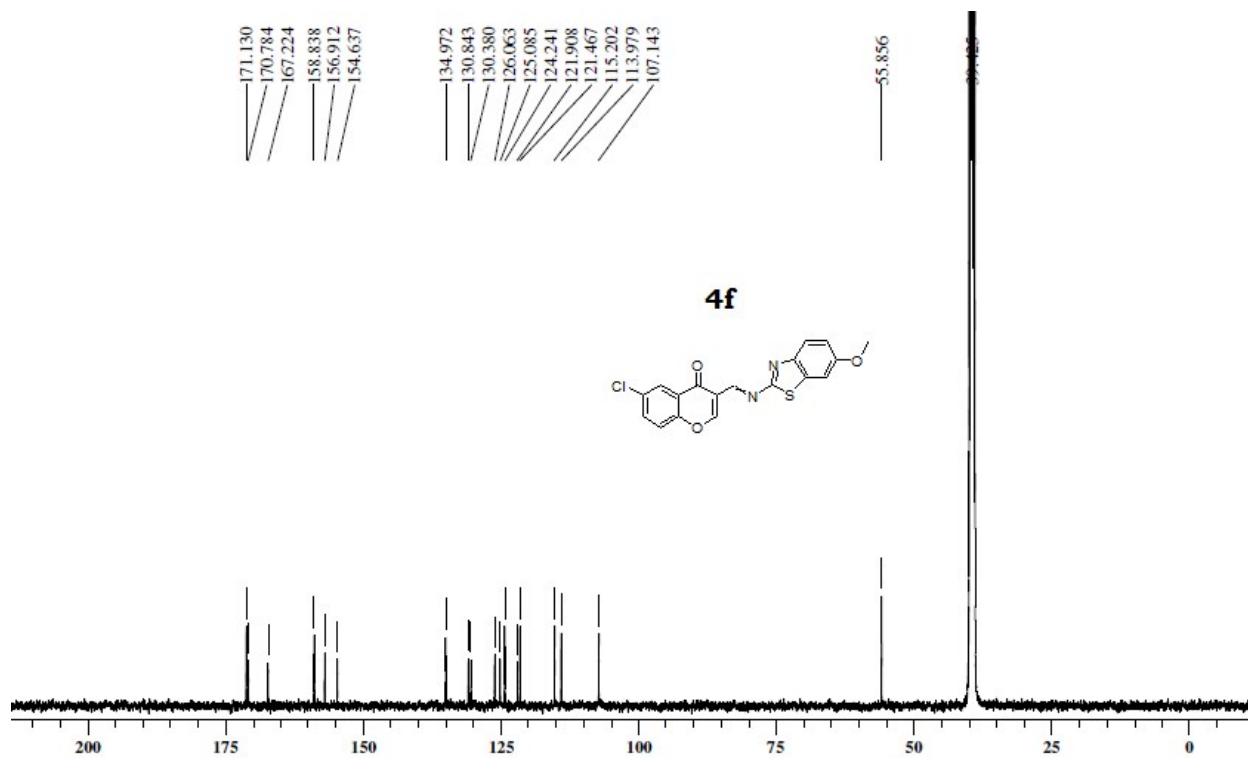





6-chloro-3-(dimethoxymethyl)-4H-chromen-4-one (**5a**):

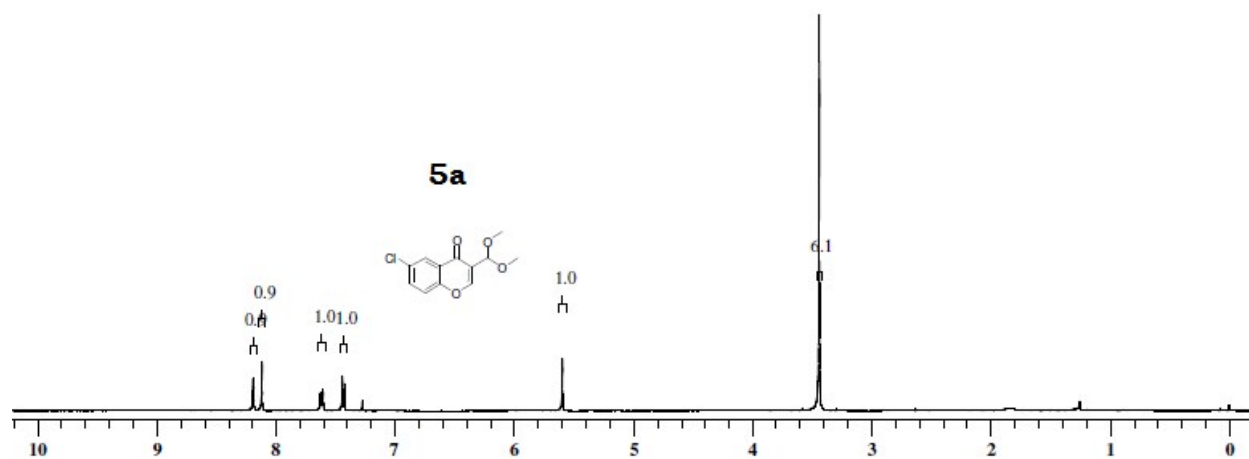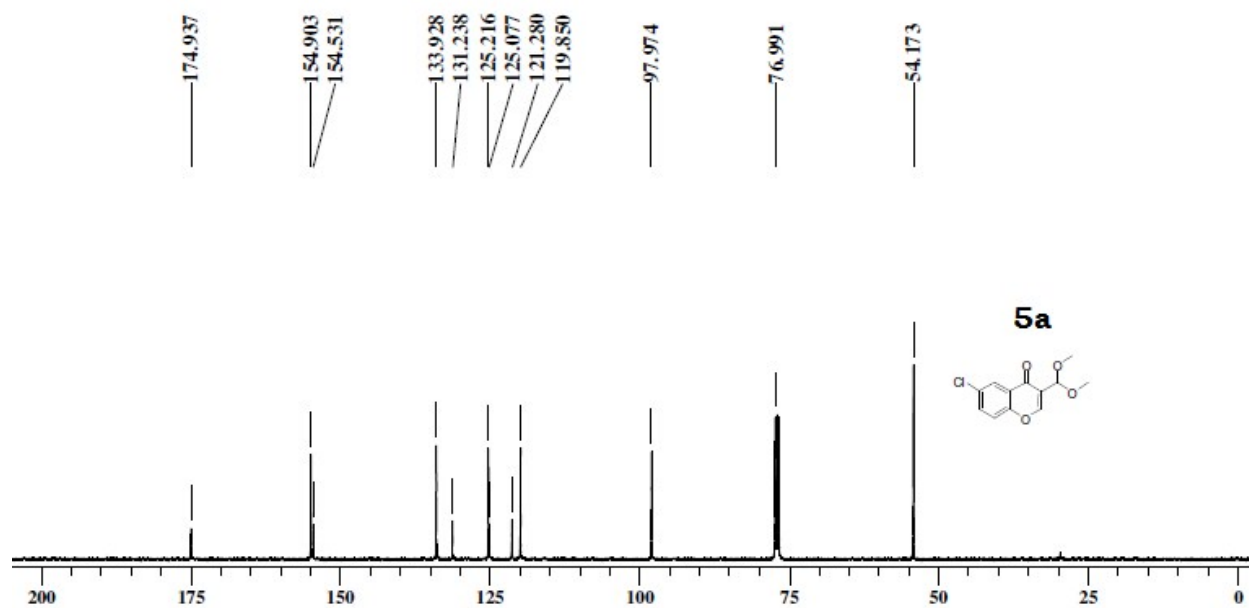

3-(dipropoxymethyl)-4H-chromen-4-one (**5b**)

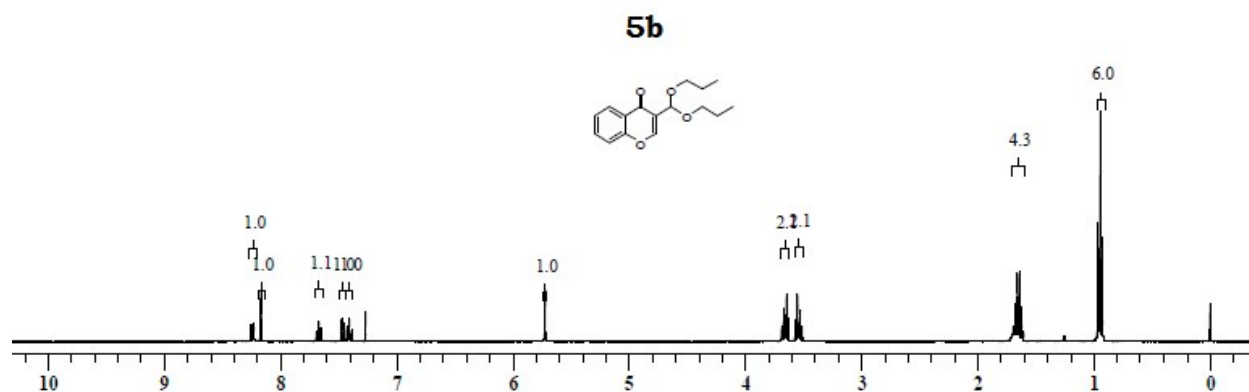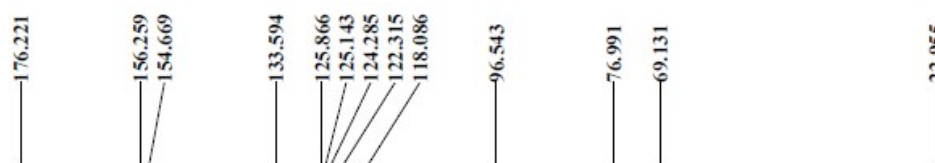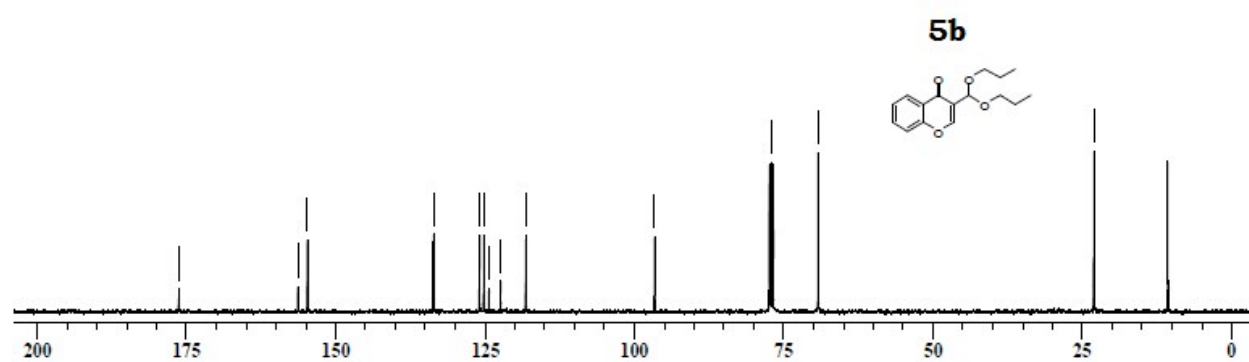

Supplement: c9ra02763g1.pdf [file c9ra02763g1.pdf]
